# Supplementary material for: Characterizing unmet medical need and the potential role of new biologic treatment options in patients with ulcerative colitis and Crohn’s disease: a systematic review and clinician surveys
Source: PubMed Central journal article supplement — Eur J Gastroenterol Hepatol. 2015 Jun 3;27(7):804–12. doi: 10.1097/MEG.0000000000000378 (PMC4892747; doi:10.1097/meg.0000000000000378), 2015-06-03
Supplement: meg-27-804-s001.pdf [file meg-27-804-s001.pdf]

# Supplemental Digital Content 1. Systematic literature review: Results and analysis

## Contents

|                                                               |     |
|---------------------------------------------------------------|-----|
| Section 1. Dose escalation and switching.....                 | 2   |
| 1A. Dose escalation and switching in ulcerative colitis ..... | 2   |
| 1B. Dose escalation and switching in Crohn’s Disease.....     | 4   |
| Section 2. Surgery.....                                       | 8   |
| 2A. Data on surgery in ulcerative colitis.....                | 8   |
| 2A. Data on surgery in Crohn’s Disease.....                   | 20  |
| Section 3. Adverse events .....                               | 35  |
| 3A. Data on adverse events in ulcerative colitis.....         | 35  |
| 3B. Data on adverse events in Crohn’s Disease .....           | 43  |
| Section 4. Resource utilisation .....                         | 60  |
| 4A.Data on resource utilisation in ulcerative colitis.....    | 60  |
| 4B. Data on resource utilisation in Crohn’s Disease.....      | 68  |
| Section 5. Quality of life .....                              | 101 |
| 5A. Data on quality of life in ulcerative colitis.....        | 101 |
| 5B. Data on quality of life in Crohn’s Disease.....           | 107 |
| Section 6. Identified studies .....                           | 121 |
| References.....                                               | 130 |

## Tables

|                                                                    |     |
|--------------------------------------------------------------------|-----|
| Table S1: Dose Escalation and Switching in UC.....                 | 3   |
| Table S2: Dose Escalation and Switching in CD .....                | 4   |
| Table S3. Details of Surgery in Ulcerative Colitis.....            | 8   |
| Table S4. Details of Surgery in Crohn’s Disease.....               | 20  |
| Table S5. Adverse events in ulcerative colitis.....                | 35  |
| Table S6. Adverse events in Crohn’s Disease .....                  | 44  |
| Table S7. Cost and Resource Utilisation in Ulcerative Colitis..... | 60  |
| Table S8. Cost and Resource Use in Crohn’s Disease Patients.....   | 69  |
| Table S9. Quality of life in ulcerative colitis.....               | 101 |
| Table S10. Quality of Life in Crohn’s Disease .....                | 107 |

## **Section 1. Dose escalation and switching**

### **1A. Dose escalation and switching in ulcerative colitis**

Table S1 presents data for dose escalation and switching with second-line anti-TNF $\alpha$  in patients with UC. A total of four studies reported data on either dose escalation or switching. Dose escalation for ADA ranged from 35% (Afif 2009[1]) to 46.2% (Oussalah 2008[2]).

Only one study reported data for switching in UC patients (Mocciaro 2012[3]). In this study, nine patients were switched to azathioprine in the INF treatment group and 13 patients started azathioprine in the cyclosporine treatment group. The rate of switching was 30% in the INF group as compared to 37.1% in the cyclosporine group. Actual rate of switching was calculated as patients responding to treatment\*proportion of patients who continued the treatment\*proportion of patients who switched (INF: 83.3% x 60% x 60%=30% and cyclosporine: 71.4% x 52% =37.1%).

In a study (Taxonera 2011[4]) assessing patients with active UC, treatment with ADA after failure of other therapies including INF resulted in dose escalation from 40 mg every other week to 40 mg weekly in 36.7% patients. The median time to dose escalation was 10 weeks (IQR: 8–23 weeks) (Taxonera 2011[4]). In another study with ADA, 35% patients had dose escalation of ADA between weeks eight and 16, from 40 mg every other week to 40 mg weekly due to incomplete response (Afif 2009[1]).

**Table S1: Dose Escalation and Switching in UC**

| Study name              | Countries | Treatment groups | No. of patients | Study duration                               | Dose escalation: n, %, rate                                                                             | Switching: n (%)                                                                                                                                                                                                                                  |
|-------------------------|-----------|------------------|-----------------|----------------------------------------------|---------------------------------------------------------------------------------------------------------|---------------------------------------------------------------------------------------------------------------------------------------------------------------------------------------------------------------------------------------------------|
| <b>Mocciaro 2012[3]</b> | Italy     | INF              | 30              | Mean (SD) follow-up: 33.6 (15.5) months      | NR                                                                                                      | Actual rate of switching: responders*proportion continued treatment*proportion switched: 83.3% (25/30) x 60% (15/25) x 60% (9/15)=30%<br>15 patients (60%) continued the treatment every 8 weeks but only 9 of them were switched to azathioprine |
| <b>Mocciaro 2012[3]</b> | Italy     | Cyclosporine     | 35              | Mean (SD) follow-up: 74.7 (60.8) months      | NR                                                                                                      | Actual rate of switching: responders*proportion switched: 71.4% (25/35) x 52% (13/25)=37.1%<br>13 of 25 (52%) initial responders started azathioprine                                                                                             |
| <b>Taxonera 2011[4]</b> | Spain     | ADA              | 30              | Mean (SD) follow-up: 74.7 (60.8) months      | 11 (36.7) underwent dose escalation between weeks 4 and 12 from 40 mg every other week to 40 mg weekly. | NR                                                                                                                                                                                                                                                |
| <b>Afif 2009[1]</b>     | USA       | ADA              | 20              | Median (IQR) follow-up: 48 (16-104) weeks    | 7 (35)                                                                                                  | NA                                                                                                                                                                                                                                                |
| <b>Oussalah 2008[2]</b> | France    | ADA              | 13              | 24 weeks                                     | 6 (46.2) had dose frequency increased to weekly                                                         | NR                                                                                                                                                                                                                                                |
|                         |           |                  |                 | Mean (range) follow-up: 41.69 (10-100) weeks |                                                                                                         |                                                                                                                                                                                                                                                   |

## 1B. Dose escalation and switching in Crohn's Disease

Table S2 presents data for dose escalation and switching with second-line anti-TNF $\alpha$  in patients with CD. A total of 17 studies reported data on either dose escalation or switching.

Dose escalation for ADA ranged from 14% (CARE Trial [Louis 2013][5]) to 72% (Cordero-Ruiz 2011[6]). A multinational study (Reenaers 2012[7]) reported dose escalation for semesters. A semester was defined as a six-month period with ADA. A flare semester was defined as deterioration in clinical symptoms requiring treatment modification (ADA reinduction, escalation to weekly ADA injection, initiation of corticosteroids or switch to another biologic), new perianal complication or abdominal surgery for active CD. A remission semester was a semester without a flare on ADA every other week or de-escalation from ADA. This study reported 81% dose escalation with ADA, which indicates that out of total 181 semesters, dose-escalation occurred in 104 semesters.

In the CARE Trial (Louis 2013)[5], dose escalation for ADA was required in 14% of the patients, with median time to dose escalation of 92 days (range: 70–137 days). In another study, 5.2% of patients (4 out of 76) had dose intensification (escalation of dose to INF 10 mg/kg in two patients and decreased interval of infusions to six weekly in the remaining two patients) (Bhalme 2013[8]). Discontinuation occurred in a total of 47.4% of patients. In the same study, 20% of patients in the ADA group required dose escalation due to LOR with a median time to LOR of 7.0 months (IQR: 4.0–12.0 months).

A study (Bultman 2012[9]) assessed the predictors for ADA dose escalation at initiation of ADA. In this study, a total of 122 (61%) CD patients received ADA for at least 3 months at the time of inclusion. Seventy-three patients (60%) had previously been treated with INF. The median length of follow-up after initiation of ADA was 51 weeks (range 12–111). Forty-six (38%) patients needed dose escalation during ADA treatment. The median time to dose escalation was 21 weeks after initiation of ADA (range 4–105). The cumulative probability of requiring dose escalation at 1 year of treatment was 39%. Median time to dose escalation was 79 weeks (95% CI: 58–100). Previous SNRs to INF more often required a dose escalation during ADA treatment than patients who previously responded to INF (57% versus 15%,  $p=0.01$ ). The cumulative probability of needing a dose escalation after 1 year was 60% in the previous SNRs to INF versus 8% in the previous responders to INF ( $p=0.01$ ). Hence this study concluded that more than one-third of patients treated with ADA required dose escalation within a median of 5 months of treatment. Higher BMI and previous non-response to INF treatment at start of ADA treatment were predictive of the need for dose escalation during ADA treatment.

In the WELCOME trial (Sandborn 2010)[10], switching was reported in 24.9% of patients in the CER every two weeks maintenance treatment group and 31.6% in the CER every four weeks maintenance treatment group. In a USA-based study, dose escalation was required in 50% of the population (59/118 patients) and occurred at a median of 4.2 months (range: 0.76 months to 3.0 years) after ADA initiation (Swoger 2010[11]). The cumulative probability of requiring a dose escalation was 54.0% at one year.

In another study in medical refractory CD patients, 59% required dose escalation to ADA 40 mg weekly treatment within six months of therapy (median time of escalation: 0.55 years [IQR: 0.22–1.5]) (Ho 2008[12]). Although ADA was efficacious in INF primary non-responders, many patients required escalation of dosing regimen. A study conducted in CD patients in Spain reported that 72% of patients required dose intensification (increase of ADA to a weekly dose), in order to maintain clinical response (Cordero-Ruiz 2011[6]).

### Table S2: Dose Escalation and Switching in CD

| Study name                                | Countries                                                                                                                                                                    | Treatment groups                                       | No. of patients | Study duration                                                      | Dose escalation: n, %, rate                                                                                          | Switching: n (%)        |
|-------------------------------------------|------------------------------------------------------------------------------------------------------------------------------------------------------------------------------|--------------------------------------------------------|-----------------|---------------------------------------------------------------------|----------------------------------------------------------------------------------------------------------------------|-------------------------|
| <b>Bhalme 2013[8]</b>                     | Netherlands and Germany                                                                                                                                                      | ADA                                                    | 54              | NR                                                                  | 11 (20)                                                                                                              | NR                      |
| <b>Bhalme 2013[8]</b>                     | Netherlands and Germany                                                                                                                                                      | INF                                                    | 76              | NR                                                                  | 4 (5.2)                                                                                                              | NR                      |
| <b>CARE trial (Louis 2013)[5]</b>         | European countries (Austria, Belgium, Czech Republic, Denmark, Finland, France, Germany, Greece, Ireland, Italy, Norway, Portugal, Slovakia, Spain, Sweden, Switzerland, UK) | ADA                                                    | 945             | 20 weeks                                                            | 131 (14)                                                                                                             | NR                      |
| <b>Reenaers 2012[7]</b>                   | Multinational (Belgium and UK)                                                                                                                                               | Maintenance study: Patients treated 12 months with ADA | 181             | NR                                                                  | Semesters:<br>ADA monotherapy<br>ADA dose escalation 104 (81)<br>ADA+IS<br>ADA dose escalation 53 (80), ( $p=0.95$ ) | 1 switch to IFX (0.01%) |
| <b>Cohen 2012[13]</b>                     | USA                                                                                                                                                                          | ADA                                                    | 75              | NR                                                                  | First dose escalation: 31 (41)<br>Second dose escalation (80 mg/week): 10(32%)                                       | NR                      |
| <b>Bultman 2012[9]</b>                    | Netherlands                                                                                                                                                                  | ADA                                                    | 122             | Median (range) follow-up after initiation of ADA: 51 (12-111) weeks | 46(38)                                                                                                               | NR                      |
| <b>ACCESS-trial (Panaccione 2011)[14]</b> | Canada                                                                                                                                                                       | ADA                                                    | 304             | 24 weeks                                                            | 120 (39), patients had their dosage increased to weekly ADA therapy                                                  | NR                      |
| <b>Cordero-Ruiz 2011[6]</b>               | Spain                                                                                                                                                                        | ADA                                                    | 25              | Follow-up: 12 months                                                | 18 (72), patients needed to increase ADA to weekly dose, in order to maintain clinical response                      | NR                      |
| <b>Fortea-Ormaechea 2011[15]</b>          | Spain                                                                                                                                                                        | ADA                                                    | 174             | Median (IQR) follow up: 36 (21-76) weeks                            | 57 (32.8)                                                                                                            | NR                      |
| <b>WELCO ME trial (Sandbo</b>             | Multinational (Austria, Belgium,                                                                                                                                             | CER (every two weeks, maintenance)                     | 161             | 26 weeks                                                            | NR                                                                                                                   | 40 (24.9)               |

| Study name                                | Countries                                                                                                                                  | Treatment groups                    | No. of patients | Study duration                                                                    | Dose escalation: n, %, rate | Switching: n (%)                                                              |
|-------------------------------------------|--------------------------------------------------------------------------------------------------------------------------------------------|-------------------------------------|-----------------|-----------------------------------------------------------------------------------|-----------------------------|-------------------------------------------------------------------------------|
| <b>rn 2010)[10]</b>                       | Canada, Denmark, France, Germany, Italy, Norway, Netherlands, Spain, Sweden, Switzerland, the UK and USA)                                  |                                     |                 |                                                                                   |                             |                                                                               |
| <b>WELCO ME trial (Sandborn 2010)[10]</b> | Multinational (Austria, Belgium, Canada, Denmark, France, Germany, Italy, Norway, Netherlands, Spain, Sweden, Switzerland, the UK and USA) | CER (every four weeks, maintenance) | 168             | 26 weeks                                                                          | NR                          | 53 (31.6)                                                                     |
| <b>Swoger 2010[11]</b>                    | USA                                                                                                                                        | ADA                                 | 118             | Median (range) follow-up: 13.7 months (0.9 months to 4.3 years)                   | 59 (50)                     | NR                                                                            |
| <b>Russo 2010[16]</b>                     | England/Ireland                                                                                                                            | ADA                                 | 61              | 8 months                                                                          | NR                          | NR                                                                            |
| <b>Echarri 2010[17]</b>                   | Spain                                                                                                                                      | NA                                  | 16              | 48 weeks                                                                          | NR                          | 2 (12.5); patients changed to a weekly dose of ADA during maintenance therapy |
| <b>Lees 2009[18]</b>                      | UK                                                                                                                                         | ADA                                 | 30              | Median (IQR) duration of follow-up from initiation of ADA: 0.92 years (0.37-1.84) | 16 (53.3)                   | NR                                                                            |

| Study name                      | Countries   | Treatment groups | No. of patients | Study duration                               | Dose escalation: n, %, rate                                                                                                                                                                                                                                                                              | Switching: n (%) |
|---------------------------------|-------------|------------------|-----------------|----------------------------------------------|----------------------------------------------------------------------------------------------------------------------------------------------------------------------------------------------------------------------------------------------------------------------------------------------------------|------------------|
| <b>Ho 2009[19]</b>              | Scotland    | ADA              | 98              | NR                                           | 24.4%, 30.7% and 55.0% of patients required dose escalation to 40 mg weekly therapy at 6-months, 1-year and 2-year follow-up respectively. Two (28.6%) patients treated with the higher induction regimen (160/80 mg) required dose escalation over a median follow-up period of 0.56 years (0.24-0.72). | NA               |
| <b>West 2008[20]</b>            | Netherlands | ADA              | 30              | NR                                           | 8 (27)                                                                                                                                                                                                                                                                                                   | NA               |
| <b>Ho 2008[12]</b>              | UK          | ADA              | 22              | Median (IQR) follow-up: 1.0 (0.62-2.5) years | 13 (59)                                                                                                                                                                                                                                                                                                  | NR               |
| <b>Peyrin-Biroulet 2007[21]</b> | France      | ADA              | 24              | 52 weeks                                     | 6 (25)                                                                                                                                                                                                                                                                                                   | NR               |

## Section 2. Surgery

### 2A. Data on surgery in ulcerative colitis

Data for details of surgery for UC patients are presented in Table S3.

A study from the USA reported that from 2006 to 2010, 407 and 181 patients underwent initial subtotal colectomy with end ileostomy or total proctocolectomy with IPAA, respectively (Gu 2013[22]). Chaparro (2012)[23] reported a colectomy incidence of 20% per patient-year of follow-up. The cumulative incidence of colectomy was 27%, 29%, 29% and 35% at 12 weeks, 1 year, 2 years and 3 years of follow-up, respectively.

**Table S3. Details of Surgery in Ulcerative Colitis**

| Study name  | Countries | Treatment groups                                                               | No. of patients | Most common surgeries performed for CD and UC | No of patients receiving surgery, and type of surgery n (%)                                                                    | No. of surgeries in one year/ 5 years/ 10 years/ lifetime for CD and UC | Incidence of complications from the surgery types                                                                                                                                                                                                                        | Duration of hospitalisation (as reported)  | Comments |
|-------------|-----------|--------------------------------------------------------------------------------|-----------------|-----------------------------------------------|--------------------------------------------------------------------------------------------------------------------------------|-------------------------------------------------------------------------|--------------------------------------------------------------------------------------------------------------------------------------------------------------------------------------------------------------------------------------------------------------------------|--------------------------------------------|----------|
| Gu 2013[22] | USA       | Biologics: Anti-TNF- $\alpha$ therapy impact on outcomes after TPC/IPAA for UC | 25              | TPC/IPAA                                      | Peripouch data and 30-day outcomes<br>Laparoscopic surgery: 11 (44)<br>J-pouch: 24 (96)<br>Double-stapled anastomosis: 24 (96) | NR                                                                      | Cumulative 1-year complication rate (Kaplan-Meier estimated 1-year cumulative rate of complications after TPC/IPAA)<br>Anastomotic stricture: 2 (8)<br>Pelvic sepsis: 8 (32)<br>Fistula: 2(8)<br>Pouch failure: 0<br>Pouchitis: 1 (4)<br>Small-bowel obstruction: 3 (10) | Postoperative hospital stay: 7 (3-32) days |          |
| Gu          | USA       | No                                                                             | 156             | TPC/IPAA                                      | Peripouch data and 30-day                                                                                                      | NR                                                                      | Cumulative 1-                                                                                                                                                                                                                                                            | Postoperative                              |          |



| Study name         | Countries | Treatment groups                                                                        | No. of patients | Most common surgeries performed for CD and UC | No of patients receiving surgery, and type of surgery n (%)                                            | No. of surgeries in one year/ 5 years/ 10 years/ lifetime for CD and UC | Incidence of complications from the surgery types                                                                                                                                                                                                                                 | Duration of hospitalisation (as reported)  | Comments |
|--------------------|-----------|-----------------------------------------------------------------------------------------|-----------------|-----------------------------------------------|--------------------------------------------------------------------------------------------------------|-------------------------------------------------------------------------|-----------------------------------------------------------------------------------------------------------------------------------------------------------------------------------------------------------------------------------------------------------------------------------|--------------------------------------------|----------|
| <b>2013[22]</b>    |           | Biologics: Anti-TNF- $\alpha$ therapy impact on outcomes after TPC/IPAA for UC          |                 |                                               | outcomes<br>Laparoscopic surgery: 53 (34)<br>J-pouch: 154 (99)<br>Double-stapled anastomosis: 148 (95) |                                                                         | year complication rate (Kaplan-Meier estimated 1-year cumulative rate of complications after TPC/IPAA)<br>Anastomotic stricture: 21 (13)<br>Pelvic sepsis: 25 (16); $p=0.012$<br>Fistula: 9 (6)<br>Pouch failure: 7 (4)<br>Pouchitis: 15 (10)<br>Small-bowel obstruction: 25 (16) | hospital stay: 6 (3-28) days               |          |
| <b>Gu 2013[22]</b> | USA       | Biologics: Anti-TNF- $\alpha$ therapy impact on short-term outcomes after STC/EI for UC | 142             | STC/EI                                        | Urgent surgery: 42 (30)<br>Laparoscopic surgery: 73 (51)                                               | NR                                                                      | Perioperative and 30-day outcomes<br>Pelvic abscess: 3 (2)<br>(Colo)rectal stump leak: 16 (11)<br>Wound infection: 21 (15)<br>Urinary tract infection: 2 (1)<br>Pneumonia: 2 (1)                                                                                                  | Postoperative hospital stay: 5 (2-30) days |          |

| Study name  | Countries | Treatment groups                                                                           | No. of patients | Most common surgeries performed for CD and UC | No of patients receiving surgery, and type of surgery n (%) | No. of surgeries in one year/ 5 years/ 10 years/ lifetime for CD and UC | Incidence of complications from the surgery types                                                                                                                                                                                                                                                                            | Duration of hospitalisation (as reported)  | Comments |
|-------------|-----------|--------------------------------------------------------------------------------------------|-----------------|-----------------------------------------------|-------------------------------------------------------------|-------------------------------------------------------------------------|------------------------------------------------------------------------------------------------------------------------------------------------------------------------------------------------------------------------------------------------------------------------------------------------------------------------------|--------------------------------------------|----------|
|             |           |                                                                                            |                 |                                               |                                                             |                                                                         | Ileus: 17 (12)<br>EPSBO: 6 (4)<br>Postoperative hemorrhage: 3 (2)<br>Stoma complications: 3 (2)<br>Thromboembolic complications: 7 (5)                                                                                                                                                                                       |                                            |          |
| Gu 2013[22] | USA       | No Biologics: Anti-TNF- $\alpha$ impact therapy on short-term outcomes after STC/EI for UC | 265             | STC/EI                                        | Urgent surgery: 96 (36)<br>Laparoscopic surgery: 123 (46)   | NR                                                                      | Perioperative and 30-day outcomes<br>Pelvic abscess: 12 (5)<br>(Colo)rectal stump leak: 24 (9)<br>Wound infection: 28 (11)<br>Urinary tract infection: 8 (3)<br>Pneumonia: 2 (1)<br>Ileus: 34 (13)<br>EPSBO: 12 (5)<br>Postoperative hemorrhage: 9 (3)<br>Stoma complications: 7 (3)<br>Thromboembolic complications: 22 (8) | Postoperative hospital stay: 6 (2-42) days |          |

| Study name         | Countries | Treatment groups                                                                                                                                          | No. of patients | Most common surgeries performed for CD and UC | No of patients receiving surgery, and type of surgery n (%)                                                                       | No. of surgeries in one year/ 5 years/ 10 years/ lifetime for CD and UC | Incidence of complications from the surgery types                                                                                                                                                                                                                        | Duration of hospitalisation (as reported)  | Comments |
|--------------------|-----------|-----------------------------------------------------------------------------------------------------------------------------------------------------------|-----------------|-----------------------------------------------|-----------------------------------------------------------------------------------------------------------------------------------|-------------------------------------------------------------------------|--------------------------------------------------------------------------------------------------------------------------------------------------------------------------------------------------------------------------------------------------------------------------|--------------------------------------------|----------|
| <b>Gu 2013[22]</b> | USA       | Biologics: Anti-TNF- $\alpha$ therapy use before colectomy on short- and long-term outcomes after CP/IPAA for UC in patients who underwent initial STC    | 88              | CP/IPAA with initial STC                      | Peripouch data and 30-day outcomes<br>Laparoscopic surgery: 21 (24)<br>J-pouch: 88 (100)<br>Double-stapled anastomosis: 85 (98)   | NR                                                                      | Cumulative 1-year complication rate (Kaplan-Meier estimated 1-year cumulative rate of complications after TPC/IPAA)<br>Anastomotic stricture: 1 (1)<br>Pelvic sepsis: 5 (6)<br>Fistula: 2 (2)<br>Pouch failure: 0<br>Pouchitis: 2 (2)<br>Small-bowel obstruction: 9 (10) | Postoperative hospital stay: 6 (2-26) days |          |
| <b>Gu 2013[22]</b> | USA       | No Biologics: Anti-TNF- $\alpha$ therapy use before colectomy on short- and long-term outcomes after CP/IPAA for UC in patients who underwent initial STC | 164             | CP/IPAA with initial STC                      | Peripouch data and 30-day outcomes<br>Laparoscopic surgery: 42 (26)<br>J-pouch: 164 (100)<br>Double-stapled anastomosis: 160 (98) | NR                                                                      | Cumulative 1-year complication rate (Kaplan-Meier estimated 1-year cumulative rate of complications after TPC/IPAA)<br>Anastomotic stricture: 8 (5)<br>Pelvic sepsis: 16 (10)<br>Fistula: 8 (5)<br>Pouch failure: 6 (4)                                                  | Postoperative hospital stay: 6 (3-33) days |          |

| Study name               | Countries | Treatment groups | No. of patients | Most common surgeries performed for CD and UC | No of patients receiving surgery, and type of surgery n (%)                                                                               | No. of surgeries in one year/ 5 years/ 10 years/ lifetime for CD and UC                                                                                                                       | Incidence of complications from the surgery types  | Duration of hospitalisation (as reported) | Comments                                                                                                                                                                                                                                                                              |
|--------------------------|-----------|------------------|-----------------|-----------------------------------------------|-------------------------------------------------------------------------------------------------------------------------------------------|-----------------------------------------------------------------------------------------------------------------------------------------------------------------------------------------------|----------------------------------------------------|-------------------------------------------|---------------------------------------------------------------------------------------------------------------------------------------------------------------------------------------------------------------------------------------------------------------------------------------|
|                          |           |                  |                 |                                               |                                                                                                                                           |                                                                                                                                                                                               | Pouchitis: 6 (4)<br>Small-bowel obstruction: 8 (5) |                                           |                                                                                                                                                                                                                                                                                       |
| <b>Chaparro 2012[23]</b> | Spain     | Infliximab       | 47              | Colectomy                                     | Colectomy: 14 (30)                                                                                                                        | The incidence rate of colectomy was 20% per patient-year of follow-up. The cumulative incidence of colectomy was 27%, 29%, 29% and 35% at 12 weeks, 1 year, 2 years and 3 years of follow-up. | NR                                                 | NR                                        | Patients underwent colectomy at a median of 8 weeks (range: 1–162) after the first infliximab infusion. In total, 37 patients avoided colectomy in the corticosteroid-refractory flare, and only four of these 37 patients underwent colectomy after a median of 90 weeks' follow-up. |
| <b>Moccia ro 2012[3]</b> | Italy     | Cyclosporine     | 35              | Colectomy                                     | 3 months: 10 (28.5), $p=0.25$<br>12 months: 17 (48), $p=0.01$<br>2 years: 19 (54)<br>3 years: 20 (57)<br>At the end of follow-up: 21 (60) | NR                                                                                                                                                                                            | NR                                                 | NR                                        |                                                                                                                                                                                                                                                                                       |
| <b>Moccia ro 2012[3]</b> | Italy     | Infliximab       | 30              | Colectomy                                     | 3 months: 5 (17)<br>12 months: 5 (17)<br>2 years: 7 (23)<br>3 years: 8 (27)<br>At the end of follow-up: 9 (30)                            | NR                                                                                                                                                                                            | NR                                                 | NR                                        |                                                                                                                                                                                                                                                                                       |
| <b>Waters</b>            | USA       | Infliximab       | 86              | NR                                            | Pre- vs. Post-Infliximab: 21                                                                                                              | NR                                                                                                                                                                                            | NR                                                 | NR                                        |                                                                                                                                                                                                                                                                                       |

| Study name                | Countries                                           | Treatment groups | No. of patients         | Most common surgeries performed for CD and UC | No of patients receiving surgery, and type of surgery n (%)                                                                                                                              | No. of surgeries in one year/ 5 years/ 10 years/ lifetime for CD and UC | Incidence of complications from the surgery types | Duration of hospitalisation (as reported) | Comments                                                                                                                         |
|---------------------------|-----------------------------------------------------|------------------|-------------------------|-----------------------------------------------|------------------------------------------------------------------------------------------------------------------------------------------------------------------------------------------|-------------------------------------------------------------------------|---------------------------------------------------|-------------------------------------------|----------------------------------------------------------------------------------------------------------------------------------|
| <b>2012[24]</b>           |                                                     |                  |                         |                                               | (24.4) vs. 11 (12.8), <i>p</i> =0.042                                                                                                                                                    |                                                                         |                                                   |                                           |                                                                                                                                  |
| <b>Rosthoder 2012[25]</b> | USA                                                 | Infliximab       | 50 (maintenance cohort) | Colectomy                                     | Patients with moderate UC who received maintenance IFX therapy required a colectomy during follow-up: %<br><br>Overall: 27<br>Dose escalation group: 33<br>Non-dose escalation group: 21 | NR                                                                      | NR                                                | NR                                        | Mean time to colectomy was 17 months (SEM 6) in the cohort.                                                                      |
| <b>Laharie 2012[26]</b>   | Multinational (France, Spain, Belgium, and Finland) | Ciclosporin      | 58                      | Colectomy                                     | 10 (17)                                                                                                                                                                                  | NR                                                                      | NR                                                | NR                                        |                                                                                                                                  |
| <b>Laharie 2012[26]</b>   | Multinational (France, Spain, Belgium, and Finland) | Infliximab       | 57                      | Colectomy                                     | 12 (21)                                                                                                                                                                                  | NR                                                                      | NR                                                | NR                                        |                                                                                                                                  |
| <b>Taxoneira 2011[4]</b>  | Spain                                               | Adalimumab       | 30                      | Colectomy                                     | 6 (20)                                                                                                                                                                                   | NR                                                                      | NR                                                | NR                                        | The probability of avoiding colectomy was 96.7%, 90%, 90%, 83.3%, 83.3% and 80% at 4, 12, 20, 30, 40 and 60 weeks, respectively. |
| <b>Alzafiri</b>           | Canada                                              | Infliximab       | 19                      | NR                                            | NA                                                                                                                                                                                       | NR                                                                      | NR                                                | NR                                        | 2 (8%) UC patients                                                                                                               |

| Study name                      | Countries | Treatment groups                                                  | No. of patients | Most common surgeries performed for CD and UC | No of patients receiving surgery, and type of surgery n (%)                                                                                                                                                                            | No. of surgeries in one year/ 5 years/ 10 years/ lifetime for CD and UC | Incidence of complications from the surgery types | Duration of hospitalisation (as reported)                                           | Comments                                                                                                              |
|---------------------------------|-----------|-------------------------------------------------------------------|-----------------|-----------------------------------------------|----------------------------------------------------------------------------------------------------------------------------------------------------------------------------------------------------------------------------------------|-------------------------------------------------------------------------|---------------------------------------------------|-------------------------------------------------------------------------------------|-----------------------------------------------------------------------------------------------------------------------|
| <b>2011[27]</b>                 |           |                                                                   |                 |                                               |                                                                                                                                                                                                                                        |                                                                         |                                                   |                                                                                     | underwent surgery any time prior to infliximab                                                                        |
| <b>Oussalah 2010[28]</b>        | France    | Infliximab                                                        | 191             | Colectomy                                     | Colectomy: 36 (18.8); (95 % CI = 13.3-24.4 %)<br>Colectomy rates according to mucosal healing: 1/30 (3%) patient who achieved mucosal healing and 13/33 (39%) without mucosal healing had a Colectomy during the follow-up $p=0.004$ . | NR                                                                      | NR                                                | NR                                                                                  |                                                                                                                       |
| <b>Herrlinger 2010[29]</b>      | Germany   | Infliximab                                                        | 24              | Colectomy                                     | Response only: 4<br>Failure: 10<br>total Colectomy: 14 (58.3)                                                                                                                                                                          | NR                                                                      | NR                                                | NR                                                                                  |                                                                                                                       |
| <b>Jurgens 2010[30]</b>         | Germany   | Infliximab                                                        | 90              | Colectomy                                     | 6/90 (6.7)                                                                                                                                                                                                                             | NR                                                                      | NR                                                | NR                                                                                  |                                                                                                                       |
| <b>Gies 2010[31]</b>            | Canada    | Adalimumab (Maintenance)                                          | 20              | Colectomy                                     | Of the six ADA patients who lost response, two chose colectomy as therapy.                                                                                                                                                             | NR                                                                      | NR                                                | NR                                                                                  |                                                                                                                       |
| <b>Gies 2010[31]</b>            | Canada    | Infliximab (Maintenance)                                          | 18              | Colectomy                                     | Of the four IFX patients who lost response, one chose colectomy as therapy.                                                                                                                                                            | NR                                                                      | NR                                                | NR                                                                                  |                                                                                                                       |
| <b>Ananthakrishnan 2009[32]</b> | USA       | Colectomy (Infliximab use)<br>Never: 13 (48.2)<br>Ever: 14 (51.9) | 27              | NR                                            | NR                                                                                                                                                                                                                                     | NR                                                                      | NR                                                | Prior medical hospitalisation required for UC<br>Never: 6 (22.2)<br>Ever: 21 (77.8) | Among patients who required medical hospitalisation for management of disease, one-fifth (21/103, 20.4%) subsequently |

| Study name                      | Countries                                                   | Treatment groups                                                      | No. of patients | Most common surgeries performed for CD and UC | No of patients receiving surgery, and type of surgery n (%)                                                               | No. of surgeries in one year/ 5 years/ 10 years/ lifetime for CD and UC | Incidence of complications from the surgery types | Duration of hospitalisation (as reported)                                                                              | Comments                                                                                                                                                                                          |
|---------------------------------|-------------------------------------------------------------|-----------------------------------------------------------------------|-----------------|-----------------------------------------------|---------------------------------------------------------------------------------------------------------------------------|-------------------------------------------------------------------------|---------------------------------------------------|------------------------------------------------------------------------------------------------------------------------|---------------------------------------------------------------------------------------------------------------------------------------------------------------------------------------------------|
|                                 |                                                             |                                                                       |                 |                                               |                                                                                                                           |                                                                         |                                                   |                                                                                                                        | required colectomy, while only 6 out of 143 patients (4.2%) who had never required hospitalisation underwent colectomy.<br><br>The median time to colectomy after hospitalisation was 2.0 months. |
| <b>Ananthakrishnan 2009[32]</b> | USA                                                         | No colectomy (Infliximab use<br>Never: 170 (77.6)<br>Ever: 49 (22.4)) | 219             | NR                                            | NR                                                                                                                        | NR                                                                      | NR                                                | Prior medical hospitalisation required for UC<br>Never: 137 (62.6)<br>Ever: 82 (37.4);<br><i>p</i> <0.001              |                                                                                                                                                                                                   |
| <b>Ho 2009a[33]</b>             | UK                                                          | Corticosteroids                                                       | 90              | Colectomy                                     | 20 (22.2)                                                                                                                 | NR                                                                      | NR                                                | NR                                                                                                                     |                                                                                                                                                                                                   |
| <b>Ho 2009a[33]</b>             | UK                                                          | Infliximab                                                            | 21              | Colectomy                                     | 11 (52.4)                                                                                                                 | NR                                                                      | NR                                                | NR                                                                                                                     |                                                                                                                                                                                                   |
| <b>Sandborn 2009[34]</b>        | Multinational (USA, Argentina, Australia, Austria, Belgium, | ACT 1 and 2 trial: Placebo                                            | 244             | Colectomy                                     | No. of UC related surgeries/procedures analysis<br>Surgical procedures:<br>0: 197(81)<br>1: 34(14)<br>2: 8(3)<br>>2: 5(2) | Kaplan Meir estimates for colectomy within 54 weeks: 36(17)             | NR                                                | No. of UC related surgeries/procedures analysis<br>Hospitalisations:<br>0: 184(75)<br>1: 46(19)<br>2: 9(4)<br>>2: 5(2) | The numbers of ulcerative colitis-related hospitalisations and surgeries/procedures through 54 weeks were                                                                                         |

| Study name               | Countries                                                                                                                                                        | Treatment groups                   | No. of patients | Most common surgeries performed for CD and UC | No of patients receiving surgery, and type of surgery n (%)                                                               | No. of surgeries in one year/ 5 years/ 10 years/ lifetime for CD and UC | Incidence of complications from the surgery types | Duration of hospitalisation (as reported)                                                                              | Comments                                                                                                                                                                                                                                                                                      |
|--------------------------|------------------------------------------------------------------------------------------------------------------------------------------------------------------|------------------------------------|-----------------|-----------------------------------------------|---------------------------------------------------------------------------------------------------------------------------|-------------------------------------------------------------------------|---------------------------------------------------|------------------------------------------------------------------------------------------------------------------------|-----------------------------------------------------------------------------------------------------------------------------------------------------------------------------------------------------------------------------------------------------------------------------------------------|
|                          | Canada, Czech Republic, Denmark, France, Germany, Israel, Netherlands, New Zealand, Switzerland, UK)                                                             |                                    |                 |                                               |                                                                                                                           |                                                                         |                                                   |                                                                                                                        | expressed as events per 100 patient- years: n=34<br>Total duration of colectomy follow-up is the sum of the complete colectomy follow-up and incomplete colectomy follow-up, and is reported in patient-years(%): 202.5(87.8)                                                                 |
| <b>Sandborn 2009[34]</b> | Multinational (USA, Argentina, Australia, Austria, Belgium, Canada, Czech Republic, Denmark, France, Germany, Israel, Netherlands, New Zealand, Switzerland, UK) | ACT 1 and 2 trial: 5 mg Infliximab | 242             | Colectomy                                     | No. of UC related surgeries/procedures analysis<br>Surgical procedures:<br>0: 207(86)<br>1: 28(12)<br>2: 3(1)<br>>2: 4(2) | Kaplan Meir estimates for colectomy within 54 weeks: 28(12)             | NR                                                | No. of UC related surgeries/procedures analysis<br>Hospitalisations:<br>0: 203(84)<br>1: 31(13)<br>2: 8(3)<br>>2: 0(0) | The numbers of ulcerative colitis-related hospitalisations and surgeries/procedures through 54 weeks were expressed as events per 100 patient- years: n=22<br>Total duration of colectomy follow-up is the sum of the complete colectomy follow-up and incomplete colectomy follow-up, and is |



| Study name               | Countries                                                                                                                                                        | Treatment groups                    | No. of patients | Most common surgeries performed for CD and UC | No of patients receiving surgery, and type of surgery n (%)                                                              | No. of surgeries in one year/ 5 years/ 10 years/ lifetime for CD and UC | Incidence of complications from the surgery types | Duration of hospitalisation (as reported)                                                                                | Comments                                                                                                                                                                                                                                                                                                                                                                                |
|--------------------------|------------------------------------------------------------------------------------------------------------------------------------------------------------------|-------------------------------------|-----------------|-----------------------------------------------|--------------------------------------------------------------------------------------------------------------------------|-------------------------------------------------------------------------|---------------------------------------------------|--------------------------------------------------------------------------------------------------------------------------|-----------------------------------------------------------------------------------------------------------------------------------------------------------------------------------------------------------------------------------------------------------------------------------------------------------------------------------------------------------------------------------------|
| <b>Sandborn 2009[34]</b> | Multinational (USA, Argentina, Australia, Austria, Belgium, Canada, Czech Republic, Denmark, France, Germany, Israel, Netherlands, New Zealand, Switzerland, UK) | ACT 1 and 2 trial: 10 mg Infliximab | 242             | Colectomy                                     | No. of UC related surgeries/procedures analysis<br>Surgical procedures:<br>0: 214(88)<br>1: 18(7)<br>2: 7(3)<br>>2: 3(1) | Kaplan Meir estimates for colectomy within 54 weeks: 18(8)              | NR                                                | No. of UC related surgeries/procedures analysis<br>Hospitalisations:<br>0: 205(85)<br>1: 33(14)<br>2: 3(1)<br>>2: 1(0.4) | reported in patient-years(%): 223.1(94.6)<br><br>The numbers of ulcerative colitis-related hospitalisations and surgeries/procedures through 54 weeks were expressed as events per 100 patient-years: n=19<br>Total duration of colectomy follow-up is the sum of the complete colectomy follow-up and incomplete colectomy follow-up, and is reported in patient-years(%): 220.8(92.4) |
| <b>Aratari 2008[35]</b>  | Italy                                                                                                                                                            | Hydrocortisone                      | 52              | Colectomy                                     | 10 (19)                                                                                                                  | NR                                                                      | NR                                                | NR                                                                                                                       | The number of surgeries indicate overall number; 8 with steroid treatment and 2 with Infliximab                                                                                                                                                                                                                                                                                         |
| <b>Maser 2008[36]</b>    | USA                                                                                                                                                              | Infliximab-salvage                  | 10              | Colectomy                                     | For overall population: 8/19 (42) had a colectomy within 1 year                                                          | NR                                                                      | NR                                                | NR                                                                                                                       | In both groups, all patients who required                                                                                                                                                                                                                                                                                                                                               |

| Study name               | Countries          | Treatment groups      | No. of patients | Most common surgeries performed for CD and UC | No of patients receiving surgery, and type of surgery n (%)                                                                                                                                          | No. of surgeries in one year/ 5 years/ 10 years/ lifetime for CD and UC | Incidence of complications from the surgery types | Duration of hospitalisation (as reported) | Comments                                                                                                                                                                                                    |
|--------------------------|--------------------|-----------------------|-----------------|-----------------------------------------------|------------------------------------------------------------------------------------------------------------------------------------------------------------------------------------------------------|-------------------------------------------------------------------------|---------------------------------------------------|-------------------------------------------|-------------------------------------------------------------------------------------------------------------------------------------------------------------------------------------------------------------|
|                          |                    |                       |                 |                                               |                                                                                                                                                                                                      |                                                                         |                                                   |                                           | colectomy or died had a Lichtiger score of greater than 10.                                                                                                                                                 |
| <b>Maser 2008[36]</b>    | USA                | Ciclosporin e-salvage | 9               | Colectomy                                     |                                                                                                                                                                                                      | NR                                                                      | NR                                                | NR                                        |                                                                                                                                                                                                             |
| <b>Oussalah 2008[21]</b> | France             | Adalimumab            | 13              | Colectomy                                     | After a median duration of follow-up of 41 weeks, 6/13 (46.2) underwent colectomy                                                                                                                    | NR                                                                      | NR                                                | NR                                        | The probability of remaining colectomy-free was 92.3% ( $\pm 7.39\%$ ), 84.6% ( $\pm 10.0\%$ ), 69.2% ( $\pm 12.8\%$ ) and 49.5% ( $\pm 14.9\%$ ) at 1, 3, 6 and 23 months respectively.                    |
| <b>Regueiro 2006[37]</b> | USA                | Infliximab            | 12              | Colectomy                                     | 9 (75)                                                                                                                                                                                               | NR                                                                      | NR                                                | NR                                        |                                                                                                                                                                                                             |
| <b>Gornet 2003[38]</b>   | France             | Infliximab            | 30              | Colectomy                                     | Colectomy: 8/30 (27)<br>Probability of colectomy: The probability of colectomy was 7% (95% CI: 2% to 12%) at month 1, 17% (95% CI: 10% to 24%) at month 3, and 33% (95% CI: 23% to 43%) at month 12. | NR                                                                      | NR                                                | NR                                        | Two variables were associated with a higher rate of colectomy: the severity of the attack (8/19 vs. 0/11; $p < 0.02$ ), and the absence of concomitant use of antimetabolites (5/8 vs. 3/21; $p < 0.001$ ). |
| <b>Probert</b>           | Multinational (UK) | Placebo group         | 20              | Colectomy                                     | One patient underwent colectomy because of toxic                                                                                                                                                     | NR                                                                      | NR                                                | NR                                        |                                                                                                                                                                                                             |

| Study name              | Countries                      | Treatment groups | No. of patients | Most common surgeries performed for CD and UC | No of patients receiving surgery, and type of surgery n (%)                                                                                                                                                                                                                        | No. of surgeries in one year/ 5 years/ 10 years/ lifetime for CD and UC | Incidence of complications from the surgery types                                                              | Duration of hospitalisation (as reported) | Comments |
|-------------------------|--------------------------------|------------------|-----------------|-----------------------------------------------|------------------------------------------------------------------------------------------------------------------------------------------------------------------------------------------------------------------------------------------------------------------------------------|-------------------------------------------------------------------------|----------------------------------------------------------------------------------------------------------------|-------------------------------------------|----------|
| <b>2003[39]</b>         | and Germany)                   |                  |                 |                                               | exacerbation and spontaneous perforation.                                                                                                                                                                                                                                          |                                                                         |                                                                                                                |                                           |          |
| <b>Probert 2003[39]</b> | Multinational (UK and Germany) | Infliximab group | 23              | NR                                            | NR                                                                                                                                                                                                                                                                                 | NR                                                                      | NR                                                                                                             | NR                                        |          |
| <b>Su 2002[40]</b>      | USA                            | Infliximab       | 27              | Proctocolectomy - 5                           | Five of the non-responders subsequently underwent total proctocolectomy 6 to 40 days (median, 10 days) after the last infliximab dose, and one of the partial responders had total proctocolectomy for a lack of sustained response 5 months after his second infliximab infusion. | NR                                                                      | Central venous line sepsis and associated sub acute bacterial endocarditis: 1 patient<br>Candidemia: 1 patient | NR                                        |          |

## 2A. Data on surgery in Crohn's Disease

Table S4 presents details for the most common surgeries performed in CD patients.

The most common surgeries were colectomy, ileostomy, partial bowel resection, total colectomy and end-ileostomy. In one study (Patil 2013[41]), at one year follow-up, patients in the INF group had undergone a mean 0.61 (SD: 1.2) CD-related surgeries; whereas patients in the ADA/CER group had undergone a mean 0.41 (0.68) CD-related surgeries ( $p=0.44$ ).

In a UK based study, the authors reported different types of surgeries. The proportions of patients undergoing colectomy, ileostomy or partial bowel resection were higher in the post-INF period than pre-INF period. During the 0 to 24 month period following initiation of INF, 13 patients (3.4%) underwent colectomy, 11 (2.9%) underwent ileostomy and 26 (6.8%) underwent partial bowel resection. However, patients who had recently undergone major surgery were less likely to be treated with INF; therefore, the number of procedures performed might have been low in the pre-INF group (Lindsay 2013[42]).

In the INF treated group, there were 79 (annual rate/100 person-years: 6.9) surgeries in the first year of follow-up; whereas in the ADA treated group, there were 52 (annual rate/100 person-years: 7.6) surgeries in the first year of follow-up (Osterman 2014[43]).

**Table S4. Details of Surgery in Crohn's Disease**

| Study name     | Countries                               | Treatment groups            | No. of patients | Most common surgeries performed for CD | No of patients receiving surgery, and type of surgery n (%) | No. of surgeries in one year/ 5 years/ 10 years/ lifetime for CD and UC                  | Incidence of complications from the surgery types | Comments                                                                     |
|----------------|-----------------------------------------|-----------------------------|-----------------|----------------------------------------|-------------------------------------------------------------|------------------------------------------------------------------------------------------|---------------------------------------------------|------------------------------------------------------------------------------|
| Patil 2013[41] | USA                                     | Infliximab                  | 31              | NR                                     | NR                                                          | Number of disease related surgeries at 1 year follow-up: Mean (SD): 0.61 (1.2), $p=0.44$ | NR                                                | Two patients were initiated on anti-TNF agents for postoperative prophylaxis |
| Patil 2013[41] | USA                                     | Adalimumab/<br>Certolizumab | 29              | NR                                     | NR                                                          | Number of disease related surgeries at 1 year follow-up: Mean (SD): 0.41 (0.68)          | NR                                                | Two patients were initiated on anti-TNF agents for postoperative prophylaxis |
| Bhalme 2013[8] | Multinational (Netherlands and Germany) | Adalimumab                  | 54              | NR                                     | NR                                                          | NR                                                                                       | NR                                                | Previous surgery: 22 (40.7)                                                  |
| Bhalme 2013[8] | Multinational (Netherlands and Germany) | Infliximab                  | 76              | NR                                     | NR                                                          | NR                                                                                       | NR                                                | Previous surgery: 54 (71.1)                                                  |
| CARE           | Multinational                           | Adalimumab                  | 945             | NR                                     | NR                                                          | NR                                                                                       | NR                                                | Previous Crohn's disease                                                     |

| Study name                   | Countries                                                                                                                                                 | Treatment groups | No. of patients        | Most common surgeries performed for CD        | No of patients receiving surgery, and type of surgery n (%)                                                                                                                     | No. of surgeries in one year/ 5 years/ 10 years/ lifetime for CD and UC                                                        | Incidence of complications from the surgery types | Comments                    |
|------------------------------|-----------------------------------------------------------------------------------------------------------------------------------------------------------|------------------|------------------------|-----------------------------------------------|---------------------------------------------------------------------------------------------------------------------------------------------------------------------------------|--------------------------------------------------------------------------------------------------------------------------------|---------------------------------------------------|-----------------------------|
| <b>Trial (Louis 2013)[5]</b> | (Austria, Belgium, Czech Republic, Denmark, Finland, France, Germany, Greece, Ireland, Italy, Norway, Portugal, Slovakia, Spain, Sweden, Switzerland, UK) |                  |                        |                                               |                                                                                                                                                                                 |                                                                                                                                |                                                   | related surgery: 518 (54.8) |
| <b>Ghazi 2013[44]</b>        | USA                                                                                                                                                       | Step Up          | 39                     | NR                                            | NR                                                                                                                                                                              | Mean (SD)<br>At 1 year, 0.28 (0.8) surgeries                                                                                   | NR                                                |                             |
| <b>Ghazi 2013[44]</b>        | USA                                                                                                                                                       | Early Bio        | 54                     | NR                                            | NR                                                                                                                                                                              | Mean (SD)<br>At 1 year, 0.50 (0.8) surgeries; <i>p</i> =NS                                                                     | NR                                                |                             |
| <b>Lindsay 2013[42]</b>      | UK                                                                                                                                                        | Infliximab       | 380                    | Colectomy, ileostomy, partial bowel resection | During the 0 to 24 month period following initiation of infliximab, 13 patients (3.4%) had a colectomy, 11 (2.9%) had an ileostomy and 26 (6.8%) had a partial bowel resection. | NR                                                                                                                             | NR                                                |                             |
| <b>Osterman 2014[43]</b>     | USA                                                                                                                                                       | Infliximab       | 1459 (Evaluable: 1445) | NR                                            | 122 (5.5)                                                                                                                                                                       | Surgeries in first year of follow-up: 79 (6.9)<br>After censoring follow-up 90 days after discontinuation of therapy: 77 (5.8) | NR                                                |                             |
| <b>Osterman</b>              | USA                                                                                                                                                       | Adalimumab       | 871 (Evaluable: 861)   | NR                                            | 91 (6.9)                                                                                                                                                                        | Surgeries in first year of follow-up: 52 (7.6)                                                                                 | NR                                                |                             |

| Study name               | Countries                      | Treatment groups        | No. of patients | Most common surgeries performed for CD                                         | No of patients receiving surgery, and type of surgery n (%)                                                                                                                                             | No. of surgeries in one year/ 5 years/ 10 years/ lifetime for CD and UC                                                                                   | Incidence of complications from the surgery types | Comments |
|--------------------------|--------------------------------|-------------------------|-----------------|--------------------------------------------------------------------------------|---------------------------------------------------------------------------------------------------------------------------------------------------------------------------------------------------------|-----------------------------------------------------------------------------------------------------------------------------------------------------------|---------------------------------------------------|----------|
| <b>2014[43]</b>          |                                |                         | 865)            |                                                                                |                                                                                                                                                                                                         | After censoring follow-up 90 days after discontinuation of therapy: 47 (7)                                                                                |                                                   |          |
| <b>Seminero 2013[45]</b> | USA                            | Infliximab              | 492             | Intestinal operations                                                          | At least one Intestinal surgery:<br>Prior to infliximab: 272/492 (55)<br>While receiving infliximab: 65/492 (13)<br>Following treatment with infliximab (>12 weeks off of the medication): 136/492 (28) | Median (range) number of intestinal surgeries:<br>Prior to infliximab: 1 (0–9)<br>During infliximab therapy: 0 (0–4)<br>After infliximab therapy: 0 (0-6) | NR                                                |          |
| <b>Sprakes 2012[46]</b>  | UK                             | Infliximab-Continuation | 173             | Intestinal resection                                                           | 13 (7.5)                                                                                                                                                                                                | NR                                                                                                                                                        | NR                                                |          |
| <b>Sakuraba 2013[47]</b> | USA                            | Natalizumab             | 49              | Colectomy - 1 patient who discontinued natalizumab after developing malignancy | 14/25 (56) who discontinued natalizumab required surgical therapy                                                                                                                                       | NR                                                                                                                                                        | NR                                                |          |
| <b>Zorzi 2012[48]</b>    | Italy                          | Infliximab              | 44              | NR                                                                             | Induction:<br>No response requiring urgent surgery after week 2 in 2 (4.5%)<br>Maintenance:<br>3/5 patients with LOR required surgical resection due to refractory disease.                             | NR                                                                                                                                                        | NR                                                |          |
| <b>Zorzi 2012[48]</b>    | Italy                          | Adalimumab              | 49              | NR                                                                             | Maintenance: 4/8 with LOR required elective surgery                                                                                                                                                     | NR                                                                                                                                                        | NR                                                |          |
| <b>Reenaers 2012[7]</b>  | Multinational (Belgium and UK) | Induction study         | 207             | NR                                                                             | NR                                                                                                                                                                                                      | NR                                                                                                                                                        | NR                                                |          |
| <b>Reenaers</b>          | Multinational (Belgium and     | Maintenance study:      | 181             | NR                                                                             | Semesters:<br>Adalimumab monotherapy:                                                                                                                                                                   | NR                                                                                                                                                        | NR                                                |          |

| Study name              | Countries                      | Treatment groups                                                                                                      | No. of patients                                                                                            | Most common surgeries performed for CD                                                                                        | No of patients receiving surgery, and type of surgery n (%)                                                                                                                                                                                       | No. of surgeries in one year/ 5 years/ 10 years/ lifetime for CD and UC | Incidence of complications from the surgery types | Comments                                              |
|-------------------------|--------------------------------|-----------------------------------------------------------------------------------------------------------------------|------------------------------------------------------------------------------------------------------------|-------------------------------------------------------------------------------------------------------------------------------|---------------------------------------------------------------------------------------------------------------------------------------------------------------------------------------------------------------------------------------------------|-------------------------------------------------------------------------|---------------------------------------------------|-------------------------------------------------------|
| <b>2012[7]</b>          | UK)                            | Patients treated 12 months with adalimumab                                                                            |                                                                                                            |                                                                                                                               | Surgery 12 (7)<br>Adalimumab+IS:<br>Surgery 6 (19), ( $p=0.06$ )                                                                                                                                                                                  |                                                                         |                                                   |                                                       |
| <b>Reenaers 2012[7]</b> | Multinational (Belgium and UK) | Maintenance study: Patients treated with Adalimumab +IS during the 1st semester                                       | 45                                                                                                         | NR                                                                                                                            | Abdominal surgery (n=3): 7%                                                                                                                                                                                                                       | NR                                                                      | NR                                                |                                                       |
| <b>Waters 2012[24]</b>  | USA                            | Infliximab                                                                                                            | 182                                                                                                        | NR                                                                                                                            | Pre- vs. Post-Infliximab: 54 (29.7) vs. 18 (9.9), $p<0.0001$                                                                                                                                                                                      | NR                                                                      | NR                                                |                                                       |
| <b>Poza 2012[49]</b>    | Spain                          | One patient received more than one therapy: Antibiotics, Thiopurines, Infliximab, Adalimumab, Surgery, Second surgery | 47 (Antibiotics - 28, Thiopurines - 38, Infliximab - 30, Adalimumab - 4, Surgery - 18, Second surgery - 4) | Seton placement and drainage of associated abscesses, fistuloraphia or fistuloplastia, with advancement flaps, and ileostomy. | Surgical therapy was attempted in 18 patients. Five were treated with seton placement and drainage of associated abscesses, five patients with fistuloraphia or fistuloplastia, four with advancement flaps, and two with a definitive ileostomy. | NR                                                                      | NR                                                |                                                       |
| <b>Cohen 2012[13]</b>   | USA                            | Adalimumab                                                                                                            | 75                                                                                                         | NR                                                                                                                            | Out of 75, 31 patients who required dose escalation, of these 31, 19 (61%) required surgery<br>Out of 75, 44 patients who did not require dose escalation, 29 (66%) required surgery                                                              | NR                                                                      | NR                                                |                                                       |
| <b>Katz 2012[50]</b>    | Europe, USA, and Israel        | Infliximab: 10 mg/kg/8w                                                                                               | 112                                                                                                        | NR                                                                                                                            | NR                                                                                                                                                                                                                                                | NR                                                                      | NR                                                | Previous intestinal surgery: 10 mg/kg/8w: 41/112 (43) |
| <b>Katz 2012[50]</b>    | Multinational (Europe, USA,    | Infliximab: 5 mg/kg/4w                                                                                                | 56                                                                                                         | NR                                                                                                                            | NR                                                                                                                                                                                                                                                | NR                                                                      | NR                                                | Previous intestinal surgery: 10 mg/kg/8w: 15/56 (32)  |

| Study name               | Countries   | Treatment groups                                              | No. of patients                                                                                            | Most common surgeries performed for CD | No of patients receiving surgery, and type of surgery n (%)                              | No. of surgeries in one year/ 5 years/ 10 years/ lifetime for CD and UC | Incidence of complications from the surgery types | Comments                                                                                                                                                                                                                                                                  |
|--------------------------|-------------|---------------------------------------------------------------|------------------------------------------------------------------------------------------------------------|----------------------------------------|------------------------------------------------------------------------------------------|-------------------------------------------------------------------------|---------------------------------------------------|---------------------------------------------------------------------------------------------------------------------------------------------------------------------------------------------------------------------------------------------------------------------------|
|                          | and Israel) |                                                               |                                                                                                            |                                        |                                                                                          |                                                                         |                                                   |                                                                                                                                                                                                                                                                           |
| <b>Bultman 2012[9]</b>   | Netherlands | Adalimumab                                                    | 122                                                                                                        | NR                                     | NR                                                                                       | NR                                                                      | NR                                                | Previous resection: 52 (43%)                                                                                                                                                                                                                                              |
| <b>Sprakes 2012[46]</b>  | UK          | Infliximab-Induction                                          | 210                                                                                                        | Intestinal resection                   | 7 (3.3)                                                                                  | NR                                                                      | NR                                                | Previous Crohn's-related surgery: 131 (62.4)<br>Major abdominal surgery: 99 (47.1)<br>Examination under anaesthesia: 43 (20.5)<br>N1 surgical intervention: 70 (33.3)                                                                                                     |
|                          |             |                                                               | 380                                                                                                        |                                        |                                                                                          |                                                                         |                                                   |                                                                                                                                                                                                                                                                           |
| <b>Chaparro 2012[51]</b> | Spain       | Adalimumab                                                    | Anti-TNF naïve: 120<br>Anti-TNF experienced: 260                                                           | NR                                     | NR                                                                                       | NR                                                                      | NR                                                | Previous surgery, n (%)<br>Overall: 178 (47)<br>Anti-TNF naïve: 39%<br>Anti-TNF experienced: 51%                                                                                                                                                                          |
| <b>Chaparro 2012[52]</b> | Spain       | Infliximab                                                    | 33                                                                                                         | NR                                     | Among 6/13 patients with partial response to intensified regimen<br>Surgery: 2/6 (66.67) | NR                                                                      | NR                                                | Previous surgery: 19 (58)                                                                                                                                                                                                                                                 |
| <b>Chaparro 2011[53]</b> | Spain       | Infliximab                                                    | 309                                                                                                        | NR                                     | NR                                                                                       | NR                                                                      | NR                                                | Previous surgery: 87 (63)                                                                                                                                                                                                                                                 |
| <b>Haveran 2011[54]</b>  | USA         | Infliximab only; AZA/6-MP only; Both<br>Infliximab/(AZA/6-MP) | 22<br>(Infliximab only- 4;<br>AZA/6-MP only- 8;<br>Both<br>Infliximab/(AZA/6-MP)- 9;<br>lost to follow up- | NR                                     | NR                                                                                       | NR                                                                      | NR                                                | Before institution of either AZA/6-MP or IFX<br>Fistulising patient group: required an average of 3.9 surgical procedures per patient<br>After treatment this fell to 0.5 per fistulising patient (although 6 patients had received stomas).<br>In the remaining patients |



| Study name                       | Countries | Treatment groups     | No. of patients | Most common surgeries performed for CD | No of patients receiving surgery, and type of surgery n (%)                  | No. of surgeries in one year/ 5 years/ 10 years/ lifetime for CD and UC | Incidence of complications from the surgery types | Comments                                                                                                                                                                                  |
|----------------------------------|-----------|----------------------|-----------------|----------------------------------------|------------------------------------------------------------------------------|-------------------------------------------------------------------------|---------------------------------------------------|-------------------------------------------------------------------------------------------------------------------------------------------------------------------------------------------|
|                                  |           |                      | 1)              |                                        |                                                                              |                                                                         |                                                   | with stricture and severe pouchitis (8 total), 4 operations were required before institution of AZA/6-MP (and one patient with IFX) therapy and no surgeries were required after therapy. |
| <b>Leombruno 2011[55]</b>        | Canada    | Infliximab users     | 338             | NR                                     | CD-related intra-abdominal surgery during the observation period: 34 (10.1)  | NR                                                                      | NR                                                |                                                                                                                                                                                           |
| <b>Leombruno 2011[55]</b>        | Canada    | Infliximab non-users | 670             | NR                                     | CD-related intra-abdominal surgery during the observation period: 112 (16.7) | NR                                                                      | NR                                                |                                                                                                                                                                                           |
| <b>Cordero-Ruiz 2011[6]</b>      | Spain     | Adalimumab           | 25              | NR                                     | 2 (8)                                                                        | NR                                                                      | NR                                                | Previous intestinal surgery: 8/25 (32%)                                                                                                                                                   |
| <b>Sprakes 2011[56]</b>          | UK        | Adalimumab           | 44              | NR                                     | 7/9; among 9 non-responders 7 patients required surgery                      | NR                                                                      | NR                                                | 20(45.5%) patients underwent previous CD-related surgery                                                                                                                                  |
| <b>Alzafiri 2011[27]</b>         | Canada    | Infliximab           | 55              | NR                                     | 5 (9.09)                                                                     | NR                                                                      | NR                                                | 17 (24%) CD patients underwent surgery any time prior to infliximab                                                                                                                       |
| <b>Fortea-Ormaechea 2011[15]</b> | Spain     | Adalimumab           | 174             | NR                                     | NR                                                                           | NR                                                                      | NR                                                | Previous surgery:<br>Resections: 48 (27.6)<br>Perianal: 17 (9.8)<br>Combination of both: 22 (12.6)<br>Not defined: 17 (9.8)                                                               |
| <b>Billioud 2011[57]</b>         | France    | Adalimumab           | 108             | NR                                     | NR                                                                           | NR                                                                      | NR                                                | Previous surgery, n (%)<br>Small intestine resection: 35 (32.4)<br>Colonic resection: 29 (26.9)<br>Perineal surgery: 21 (19.4)                                                            |
| <b>Nugent 2010[58]</b>           | Canada    | Infliximab           | 126             | Thirty-eight percent of infliximab and | NR                                                                           | NR                                                                      | NR                                                |                                                                                                                                                                                           |

| Study name                       | Countries                                                                     | Treatment groups              | No. of patients           | Most common surgeries performed for CD                                                                                                     | No of patients receiving surgery, and type of surgery n (%)                                               | No. of surgeries in one year/ 5 years/ 10 years/ lifetime for CD and UC | Incidence of complications from the surgery types | Comments                                                                        |
|----------------------------------|-------------------------------------------------------------------------------|-------------------------------|---------------------------|--------------------------------------------------------------------------------------------------------------------------------------------|-----------------------------------------------------------------------------------------------------------|-------------------------------------------------------------------------|---------------------------------------------------|---------------------------------------------------------------------------------|
|                                  |                                                                               |                               |                           | 26 % of azathioprine subjects had gastrointestinal surgery before being prescribed infliximab or azathioprine, respectively ( $p=0.011$ ). |                                                                                                           |                                                                         |                                                   |                                                                                 |
| <b>ADHERE (Panacci 2010)[59]</b> | Multinational (Europe, USA, Canada)                                           | Placebo                       | 261 (139 entered ADHERE)  | NR                                                                                                                                         | ADHERE: 1/261 (0.4)<br>Overall in 2 years: 22/261 (8.4)                                                   | NR                                                                      | NR                                                |                                                                                 |
| <b>ADHERE (Panacci 2010)[59]</b> | Multinational (Europe, USA, Canada)                                           | Adalimumab eow                | 260 (144 entered ADHERE)  | NR                                                                                                                                         | ADHERE: 4/260 (1.5)<br>Overall in 2 years: 14/260 (5.4)                                                   | NR                                                                      | NR                                                |                                                                                 |
| <b>ADHERE (Panacci 2010)[59]</b> | Multinational (Europe, USA, Canada)                                           | Adalimumab weekly             | 257 ( 184 entered ADHERE) | NR                                                                                                                                         | ADHERE: 5/257 (2)<br>Overall in 2 years: 14/257 (5.4)                                                     | NR                                                                      | NR                                                |                                                                                 |
| <b>Allez 2010[60]</b>            | Multinational (France, Belgium, Switzerland, European centres (Leuven, Roma)) | Certolizumab pegol/Adalimumab | 40/27                     | NR                                                                                                                                         | NR                                                                                                        | NR                                                                      | NR                                                | Previously 31 (46%) patients underwent surgery.                                 |
| <b>Sprakes 2010[61]</b>          | UK                                                                            | Infliximab                    | 100                       | Intestinal resections and examinations under                                                                                               | 60/100 patients had undergone at least one previous surgical intervention (either intestinal resection or | 1 previous operation: 24<br>>1 previous operation: 36                   | NR                                                | Number of acute surgical admissions<br>Pre-infliximab: 34<br>Post-infliximab: 5 |

| Study name                                | Countries                                                                                                                                   | Treatment groups                         | No. of patients | Most common surgeries performed for CD | No of patients receiving surgery, and type of surgery n (%)                                                                                                           | No. of surgeries in one year/ 5 years/ 10 years/ lifetime for CD and UC | Incidence of complications from the surgery types | Comments                                                                                               |
|-------------------------------------------|---------------------------------------------------------------------------------------------------------------------------------------------|------------------------------------------|-----------------|----------------------------------------|-----------------------------------------------------------------------------------------------------------------------------------------------------------------------|-------------------------------------------------------------------------|---------------------------------------------------|--------------------------------------------------------------------------------------------------------|
|                                           |                                                                                                                                             |                                          |                 | anesthesia (EUAs)                      | EUA) at some point following their initial diagnosis, and prior to the commencement of infliximab therapy, with 36 (60%) of these having had more than one operation. |                                                                         |                                                   | Mean length of stay per surgical admission (days)<br>Pre-infliximab: 7<br>Post-infliximab: 9           |
| <b>WELCO ME trial (Sandborn 2010)[10]</b> | Multinational (Austria, Belgium, Canada, Denmark, France, Germany, Italy, Norway, Netherlands, Spain, Sweden, Switzerland, the UK, and USA) | Certolizumab (Induction)                 | 539             | NR                                     | NR                                                                                                                                                                    | NR                                                                      | NR                                                | Number of resections;<br>0: 294 (54.5)<br>1: 120 (22.3)<br>2: 77 (14.3)<br>3: 28 (5.2)<br>>3: 20 (3.7) |
| <b>WELCO ME trial (Sandborn 2010)[10]</b> | Multinational (Austria, Belgium, Canada, Denmark, France, Germany, Italy, Norway, Netherlands, Spain, Sweden, Switzerland, the UK, and USA) | Certolizumab (every 2 week, maintenance) | 161             | NR                                     | NR                                                                                                                                                                    | NR                                                                      | NR                                                | Number of resections;<br>0: 82 (50.9)<br>1: 41 (25.5)<br>2: 26 (16.1)<br>3: 8 (5.0)<br>>3: 4 (2.5)     |
| <b>WELCO ME trial (Sandborn)</b>          | Multinational (Austria, Belgium, Canada,                                                                                                    | Certolizumab (every 4 week, maintenance) | 168             | NR                                     | NR                                                                                                                                                                    | NR                                                                      | NR                                                | Number of resections;<br>0: 96 (57.1)<br>1: 46 (27.4)<br>2: 14 (8.3)                                   |

| Study name                | Countries                                                                                          | Treatment groups                      | No. of patients                     | Most common surgeries performed for CD | No of patients receiving surgery, and type of surgery n (%)   | No. of surgeries in one year/ 5 years/ 10 years/ lifetime for CD and UC                                      | Incidence of complications from the surgery types | Comments                                                                                                                                  |
|---------------------------|----------------------------------------------------------------------------------------------------|---------------------------------------|-------------------------------------|----------------------------------------|---------------------------------------------------------------|--------------------------------------------------------------------------------------------------------------|---------------------------------------------------|-------------------------------------------------------------------------------------------------------------------------------------------|
| <b>2010)[10]</b>          | Denmark, France, Germany, Italy, Norway, Netherlands, Spain, Sweden, Switzerland, the UK, and USA) | )                                     |                                     |                                        |                                                               |                                                                                                              |                                                   | 3: 8 (4.8)<br>>3: 4 (2.4)                                                                                                                 |
| <b>Swoger 2010[11]</b>    | USA                                                                                                | Adalimumab                            | 118                                 | NR                                     | 34 (29) patients underwent 45 separate surgical interventions | 1 year cumulative probability of surgery: 26.6% (95% CI: 16.9-35.7)                                          | NR                                                | 25 (21%) reported total of 36 CR related intestinal complications.                                                                        |
| <b>Stein 2010[62]</b>     | USA                                                                                                | Infliximab                            | Prior Irregular (PI) Exposure, n=40 | CD-related surgeries                   | NR                                                            | Rates of CD-related surgeries: 48.7%<br>First year: 12.5%<br>Second year: 20%<br>Third year: 15%             | NR                                                | CD-related surgeries prior to infliximab initiation: 55%.<br>CD-related medical hospitalisations prior to infliximab initiation: 37.5%.   |
| <b>Stein 2010[62]</b>     | USA                                                                                                | Infliximab                            | Scheduled Maintenance (SM), n=64    |                                        | NR                                                            | Rates of CD-related surgeries: 21.8, $p=0.004$<br>First year: 9.3%<br>Second year: 10.9%<br>Third year: 1.6% | NR                                                | CD-related surgeries prior to infliximab initiation: 60.9%.<br>CD-related medical hospitalisations prior to infliximab initiation: 35.9%. |
| <b>Echarri 2010[17]</b>   | Spain                                                                                              | Adalimumab                            | 16                                  | NR                                     | NR                                                            | NR                                                                                                           | NR                                                | Two patients had undergone perianal surgery.                                                                                              |
| <b>Hamzaoglu 2010[63]</b> | USA                                                                                                | Infliximab without Immunosuppressants | 160                                 | NR                                     | NR                                                            | NR                                                                                                           | NR                                                | In all, 152 patients (51%) had prior bowel resection for CD.                                                                              |
| <b>Taxonera 2009[64]</b>  | Spain                                                                                              | Infliximab                            | Luminal CD: 84                      | NR                                     | NR                                                            | NR                                                                                                           | NR                                                | Overall, 21.6% of the patients had been hospitalised and undergone surgery during the pre-IFX period (34.8% fistulising and               |

| Study name                | Countries | Treatment groups | No. of patients | Most common surgeries performed for CD                                                        | No of patients receiving surgery, and type of surgery n (%)                        | No. of surgeries in one year/ 5 years/ 10 years/ lifetime for CD and UC | Incidence of complications from the surgery types                                                                                                                                                                                                                                                                                                                                                                                                               | Comments                                                                                                                                                                                                                                                                                                                                                                                                                                                                   |
|---------------------------|-----------|------------------|-----------------|-----------------------------------------------------------------------------------------------|------------------------------------------------------------------------------------|-------------------------------------------------------------------------|-----------------------------------------------------------------------------------------------------------------------------------------------------------------------------------------------------------------------------------------------------------------------------------------------------------------------------------------------------------------------------------------------------------------------------------------------------------------|----------------------------------------------------------------------------------------------------------------------------------------------------------------------------------------------------------------------------------------------------------------------------------------------------------------------------------------------------------------------------------------------------------------------------------------------------------------------------|
|                           |           |                  |                 |                                                                                               |                                                                                    |                                                                         |                                                                                                                                                                                                                                                                                                                                                                                                                                                                 | 10.7% luminal).                                                                                                                                                                                                                                                                                                                                                                                                                                                            |
| <b>Ho 2009[19]</b>        | Scotland  | Adalimumab       | 98              | Total colectomy, end-ileostomy                                                                | 20 (20.4)                                                                          | NR                                                                      | NR                                                                                                                                                                                                                                                                                                                                                                                                                                                              | 36 (36.7%) patients had previous surgical resections including 11 (11.2%) with total colectomy and end-ileostomy, 17 (17.3%) with more than two small bowel resections and 7 (7.3%) with multiple perianal abscess and fistulae requiring surgical treatment.                                                                                                                                                                                                              |
| <b>Ho 2008[12]</b>        | UK        | Adalimumab       | 22              | NR                                                                                            | 6 (27)                                                                             | NR                                                                      | NR                                                                                                                                                                                                                                                                                                                                                                                                                                                              | Three patients had surgery (two colectomies, one small bowel resection) prior to initiation of adalimumab.                                                                                                                                                                                                                                                                                                                                                                 |
| <b>Schlueder 2007[65]</b> | USA       | Study cohort     | 151             | A complete mucosectomy and temporary diverting ileostomy were both performed in all patients. | Ileal pouch-anal anastomosis (IPAA): 112 (74)<br>Subtotal colectomy (STC): 39 (36) | NR                                                                      | Overall postoperative complications: 43/151 (28)<br>Medical complications:<br>Major: 8 patients (pneumonia - 3, deep vein thrombosis - 2, pancreatitis -1, acute renal failure - 1, cerebrovascular accident - 1)<br>Minor: 6 patients (dehydration - 3, superficial thrombophlebitis - 1, pyoderma gangrenosum - 1, urinary retention - 1)<br>Surgical complications:<br>Major: 14 (readmission for small bowel obstruction - 9, large peristomal abscess - 2, | Median length of stay after surgery was 6 (3-22) days<br>Influence of Infliximab with Other<br>Immunosuppressive Agents (1)<br>Complications in the 6MP/Infliximab Patient Subsets<br>(a) 6MP + Infliximab<br>No of patients: 16<br>Overall complications: 6 (38)<br>Medical complications: 2 (13)<br>Major - 0<br>Minor - 2<br>Surgical complications: 4 (25)<br>Major - 2<br>Minor - 2<br>Infectious complications: 2 (13)<br>(b) 6MP - Infliximab<br>No of patients: 59 |

| Study name | Countries | Treatment groups | No. of patients | Most common surgeries performed for CD | No of patients receiving surgery, and type of surgery n (%) | No. of surgeries in one year/ 5 years/ 10 years/ lifetime for CD and UC | Incidence of complications from the surgery types                                                                                                                                                                                                                         | Comments                                                                                                                                                                                                                                                                                                                                                                                                                                                                                                                                                                                                                                                                                                                                              |
|------------|-----------|------------------|-----------------|----------------------------------------|-------------------------------------------------------------|-------------------------------------------------------------------------|---------------------------------------------------------------------------------------------------------------------------------------------------------------------------------------------------------------------------------------------------------------------------|-------------------------------------------------------------------------------------------------------------------------------------------------------------------------------------------------------------------------------------------------------------------------------------------------------------------------------------------------------------------------------------------------------------------------------------------------------------------------------------------------------------------------------------------------------------------------------------------------------------------------------------------------------------------------------------------------------------------------------------------------------|
|            |           |                  |                 |                                        |                                                             |                                                                         | major bleeding requiring reoperation - 1, infected pyoderma gangrenosum requiring surgical debridement - 1, rectal stump leak - 1) Minor: 15 (superficial wound infection - 8, ileus - 5, minor bleeding requiring transfusion - 1) Infectious complications: 14 patients | Overall complications: 25 (42), $p=1$<br>Medical complications: 7 (12), $p=1$<br>Major - 2<br>Minor - 5<br>Surgical complications: 18 (31), $p=0.76$<br>Major - 9<br>Minor - 9<br>Infectious complications: 8 (14), $p=1$<br>(2) Complications in the CsA/Infliximab Patient Subsets<br>(a) CsA + Infliximab<br>No of patients: 5<br>Overall complications: 4 (80)<br>Medical complications: 1 (20)<br>Major - 0<br>Minor - 1<br>Surgical complications: 3 (60)<br>Major - 1<br>Minor - 2<br>Infectious complications: 3 (60)<br>(b) CsA - Infliximab<br>No of patients: 56<br>Overall complications: 16 (29), $p=0.04$<br>Medical complications: 5 (9), $p=0.41$<br>Major - 4<br>Minor - 1<br>Surgical complications: 11 (20), $p=0.08$<br>Major - 5 |

| Study name         | Countries | Treatment groups   | No. of patients | Most common surgeries performed for CD                                                        | No of patients receiving surgery, and type of surgery n (%)                                        | No. of surgeries in one year/ 5 years/ 10 years/ lifetime for CD and UC | Incidence of complications from the surgery types                                                                                                                                                                                                                                 | Comments                                                   |
|--------------------|-----------|--------------------|-----------------|-----------------------------------------------------------------------------------------------|----------------------------------------------------------------------------------------------------|-------------------------------------------------------------------------|-----------------------------------------------------------------------------------------------------------------------------------------------------------------------------------------------------------------------------------------------------------------------------------|------------------------------------------------------------|
|                    |           |                    |                 |                                                                                               |                                                                                                    |                                                                         |                                                                                                                                                                                                                                                                                   | Minor - 6 Infectious complications: 7 (13), <i>p</i> =0.03 |
| Schlueder 2007[65] | USA       | With Infliximab    | 17              | A complete mucosectomy and temporary diverting ileostomy were both performed in all patients. | IPAA: 15/17 (88)<br>STC: 2/17 (12)                                                                 | NR                                                                      | Medical complications: 1/17 (6)<br>Surgical complications: 5/17 (30)<br>Infectious complications: 3/17 (18)<br><br>Postoperative complications noted after initial subtotal colectomy (STC) or ileal pouch-anal anastomosis (IPAA):<br>Initial STC: 1/2 (50)<br>IPAA: 5/15 (33)   |                                                            |
| Schlueder 2007[65] | USA       | Without Infliximab | 134             | A complete mucosectomy and temporary diverting ileostomy were both performed in all patients. | NR                                                                                                 |                                                                         | Medical complications: 13/134 (10)<br>Surgical complications: 24/134 (18)<br>Infectious complications: 11/134 (8)<br><br>Postoperative complications noted after initial subtotal colectomy (STC) or ileal pouch-anal anastomosis (IPAA):<br>Initial STC: 7 (19)<br>IPAA: 30 (31) |                                                            |
| Saro 2007[66]      | Spain     | Infliximab         | 34              | NR                                                                                            | Pre- vs. Post-Infliximab, per year, Mean (CI);<br>Overall surgeries: 0.335 (0.158–0.511) vs. 0.105 | NR                                                                      | NR                                                                                                                                                                                                                                                                                |                                                            |

| Study name                                 | Countries                                         | Treatment groups                        | No. of patients | Most common surgeries performed for CD | No of patients receiving surgery, and type of surgery n (%)                                                                                                                                                                                                                                                                                                                                                                                                                                                                                                    | No. of surgeries in one year/ 5 years/ 10 years/ lifetime for CD and UC | Incidence of complications from the surgery types | Comments                                                                        |
|--------------------------------------------|---------------------------------------------------|-----------------------------------------|-----------------|----------------------------------------|----------------------------------------------------------------------------------------------------------------------------------------------------------------------------------------------------------------------------------------------------------------------------------------------------------------------------------------------------------------------------------------------------------------------------------------------------------------------------------------------------------------------------------------------------------------|-------------------------------------------------------------------------|---------------------------------------------------|---------------------------------------------------------------------------------|
|                                            |                                                   |                                         |                 |                                        | (0.011–0.198), $p=0.004$<br>Specific<br>Perineal abscess drainage: 0.199 (0.041–0.356) vs. 0.012 (0–0.029), $p=0.004$<br>Terminal ileum resection: 0.039 (0–0.080) vs. 0.015 (0–0.046), $p=0.249$<br>Ileo-colic resection: 0.009 (0–0.018) vs. 0.004 (0–0.012), $p=0.500$<br>Abdominal-perineal resection of rectum-sigmoid: 0.009 (0–0.026) vs. 0.000<br>Laparotomy: 0.010 (0–0.023) vs. 0.000<br>Fistulectomy: 0.028 (0–0.073) vs. 0.015 (0–0.043), $p=0.593$<br>Partial colectomy: 0.003 (0–0.08) vs. 0.006 (0–0.017), $p=0.655$<br>Others: 0.039 vs. 0.052 |                                                                         |                                                   |                                                                                 |
| <b>Jewell 2005[67]</b>                     | UK                                                | Infliximab                              | 202             | NR                                     | NR                                                                                                                                                                                                                                                                                                                                                                                                                                                                                                                                                             | NR                                                                      | NR                                                | Number of patients who had resectional surgery prior to study period: 100 (49%) |
| <b>ACCENT I Trial (Rutgeerts 2004)[68]</b> | Multinational (North America, Europe, and Israel) | Placebo (Episodic strategy)             | 188             | NR                                     | 14/188 (7.4)                                                                                                                                                                                                                                                                                                                                                                                                                                                                                                                                                   | NR                                                                      | NR                                                | Previous segmental resection: 95/188 (51)                                       |
| <b>ACCENT I Trial (Rutgeerts 2004)[68]</b> | Multinational (North America, Europe, and Israel) | Infliximab 5 mg/kg (Scheduled strategy) | 192             | NR                                     | 5/193 (2.5), $p=0.04$ vs. placebo                                                                                                                                                                                                                                                                                                                                                                                                                                                                                                                              | NR                                                                      | NR                                                | Previous segmental resection: 100/192 (52)                                      |



| Study name                                 | Countries                                         | Treatment groups                         | No. of patients                                                                   | Most common surgeries performed for CD                                                                      | No of patients receiving surgery, and type of surgery n (%) | No. of surgeries in one year/ 5 years/ 10 years/ lifetime for CD and UC | Incidence of complications from the surgery types | Comments                                                                                                                                                                                                                                                                                                                     |
|--------------------------------------------|---------------------------------------------------|------------------------------------------|-----------------------------------------------------------------------------------|-------------------------------------------------------------------------------------------------------------|-------------------------------------------------------------|-------------------------------------------------------------------------|---------------------------------------------------|------------------------------------------------------------------------------------------------------------------------------------------------------------------------------------------------------------------------------------------------------------------------------------------------------------------------------|
| <b>ACCENT I Trial (Rutgeerts 2004)[68]</b> | Multinational (North America, Europe, and Israel) | Infliximab 10 mg/kg (Scheduled strategy) | 193                                                                               | NR                                                                                                          | 6/192 (3.1), $p=0.07$ vs. placebo                           | NR                                                                      | NR                                                | Previous segmental resection: 96/193 (48)                                                                                                                                                                                                                                                                                    |
| <b>ACCENT II Trial (Sands 2004)[69]</b>    | Multinational (North America, Europe, and Israel) | Placebo maintenance                      | Evaluable N=99 (Responders at the time of randomisation) (Total randomised N=143) | Major surgeries: Resection of the bowel<br>Fistula resection or fistulotomy<br>Ostomy placement or revision | NR                                                          | NR                                                                      | NR                                                | Previous segmental resection in responders: 54/99 (55)<br>Previous segmental resection in overall non-responders (N=87): 47/87 (54)<br>The most frequently occurring major surgeries were resection of the bowel (8), fistula-related surgeries (fistula resection or fistulotomy (3), and Ostomy placement or revision (5). |
| <b>ACCENT II Trial (Sands 2004)[69]</b>    | Multinational (North America, Europe, and Israel) | Infliximab maintenance                   | Evaluable N=96 (Responders at the time of randomisation) (Total randomised N=139) | Major surgeries: Resection of the bowel<br>Fistula resection or fistulotomy<br>Ostomy placement or revision | NR                                                          | NR                                                                      | NR                                                | Previous segmental resection in responders: 55/96 (57)<br>Previous segmental resection in overall non-responders (N=87): 47/87 (54)<br>The most frequently occurring major surgeries were resection of the bowel (1), fistula-related surgeries (fistula resection or fistulotomy (2), and Ostomy placement or revision (0). |
| <b>Vermeire 2002[70]</b>                   | Belgium                                           | Infliximab                               | Refractory CD, n=137                                                              | NR                                                                                                          | NR                                                          | NR                                                                      | NR                                                | Previous abdominal surgery: 51 (37.2)                                                                                                                                                                                                                                                                                        |

| Study name               | Countries | Treatment groups | No. of patients       | Most common surgeries performed for CD | No of patients receiving surgery, and type of surgery n (%)                      | No. of surgeries in one year/ 5 years/ 10 years/ lifetime for CD and UC | Incidence of complications from the surgery types | Comments                                                             |
|--------------------------|-----------|------------------|-----------------------|----------------------------------------|----------------------------------------------------------------------------------|-------------------------------------------------------------------------|---------------------------------------------------|----------------------------------------------------------------------|
| <b>Vermeire 2002[70]</b> | Belgium   | Infliximab       | Fistulising CD, n=103 | NR                                     | NR                                                                               | NR                                                                      | NR                                                | Previous abdominal surgery: 31 (30.1)                                |
| <b>Arnott 2001[71]</b>   | UK        | Infliximab       | 39                    | NR                                     | Of the eight who did not respond, 3 had surgical resection                       | NR                                                                      | NR                                                | 20 out of the 39 patients had undergone previous surgical resections |
| <b>Arnott 2001[71]</b>   | UK        | Infliximab       | 6                     | NR                                     | When assessed at 4 weeks, of the two patients who did not respond 1 had surgery. | NR                                                                      | NR                                                | All 6 patients had undergone previous surgical resections            |

## Section 3. Adverse events

### 3A. Data on adverse events in ulcerative colitis

Data for any AEs, serious AEs and withdrawals for UC patients are reported in Table S5.

The occurrence of any AEs was 7.1% (Gies 2010[31]) to 91% (ACT 1 [Sandborn 2009[34]]) in UC patients treated with infliximab and 4% (Gies 2010[31]) to 82.9% ULTRA 2 Trial [Sandborn 2013[72]]) in UC patients treated with adalimumab.

In ULTRA 2 Trial (Sandborn 2013[72] and Sandborn 2012[73]), 39.3% patients experienced AEs related to adalimumab. A total of 36.4% patients discontinued this study. A significantly high proportion of adalimumab treated patients experienced injection-site reactions compared to placebo (31 [12.1%] versus 10 [3.8%],  $p < 0.001$ ). In another study (Rostholder 2012[25]), a total of 10% patients experienced infusion reactions related to infliximab.

**Table S5. Adverse events in ulcerative colitis**

| Study name                              | Countries                                                                 | Treatment groups | No. of patients | Any adverse events (n, %) | Serious adverse events (n, %) | Adverse events related to treatment (n, %) | Total withdrawals (due to lack of tolerance to treatment/any adverse events/ serious adverse events related to inadequate treatment response)                                                                                           | Comments |
|-----------------------------------------|---------------------------------------------------------------------------|------------------|-----------------|---------------------------|-------------------------------|--------------------------------------------|-----------------------------------------------------------------------------------------------------------------------------------------------------------------------------------------------------------------------------------------|----------|
| <b>ULTRA2 Trial (Sandborn 2013)[72]</b> | Multinational (North America, Europe, Australia, New Zealand, and Israel) | Adalimumab       | 257             | 213 (82.9)                | 31 (12.1)                     | 101 (39.3)                                 | Discontinuation: 94 (36.4)<br>Reasons for discontinuation: n (%)<br>Lack of efficacy: 63 (24.4)<br>Adverse events: 12 (4.6)<br>Withdrew consent: 8 (3.1)<br>Lost to follow-up: 1 (0.3)<br>Protocol violation: 1 (0.3)<br>Other: 9 (3.4) |          |
| <b>ULTRA2 Trial (Sandborn 2013)[72]</b> | Multinational (North America, Europe, Australia, New Zealand, and Israel) | Placebo          | 260             | 218 (83.8)                | 32 (12.3)                     | 86 (33.1)                                  | Discontinuation: 115 (44.2)<br>Reasons for discontinuation: n (%)<br>Lack of efficacy: 70 (26.9)<br>Adverse events: 25 (9.6)<br>Withdrew consent: 4 (1.5)<br>Protocol violation: 5 (1.9)<br>Other: 11 (4.2)                             |          |

|                            |                                                     |              |                         |           |          |                                                                                                                                                                                       |                                                                                                                                                                                                            |                                                                                                                                 |
|----------------------------|-----------------------------------------------------|--------------|-------------------------|-----------|----------|---------------------------------------------------------------------------------------------------------------------------------------------------------------------------------------|------------------------------------------------------------------------------------------------------------------------------------------------------------------------------------------------------------|---------------------------------------------------------------------------------------------------------------------------------|
| <b>Chaparro 2012[23]</b>   | Spain                                               | Infliximab   | 47                      | 11 (23)   | NR       | NR                                                                                                                                                                                    | Of the 37 patients with an initial response to infliximab, 12 discontinued after a median of 10.5 months (range 1–20 months).                                                                              | Seven patients discontinued infliximab after the second infusion. Patients who discontinued infliximab remained on thiopurines. |
| <b>Mocciaro 2012[3]</b>    | Italy                                               | Cyclosporine | 35                      | 1 (2.9)   | 0        | NR                                                                                                                                                                                    | NR                                                                                                                                                                                                         |                                                                                                                                 |
| <b>Mocciaro 2012[3]</b>    | Italy                                               | Infliximab   | 30                      | 6 (20)    | 0        | NR                                                                                                                                                                                    | Total withdrawals: 6 due to adverse events                                                                                                                                                                 |                                                                                                                                 |
| <b>Rostholder 2012[25]</b> | USA                                                 | Infliximab   | 50 (maintenance cohort) | NR        | NR       | Infusion reactions: 5/50 (10)<br>Mild: 4/5<br>Acute: 3/5                                                                                                                              | NR                                                                                                                                                                                                         |                                                                                                                                 |
| <b>Laharie 2012[26]</b>    | Multinational (France, Spain, Belgium, and Finland) | Ciclosporin  | 58                      | NR        | 9 (16)   | NR                                                                                                                                                                                    | NR                                                                                                                                                                                                         |                                                                                                                                 |
| <b>Laharie 2012[26]</b>    | Multinational (France, Spain, Belgium, and Finland) | Infliximab   | 57                      | NR        | 14 (25)  | NR                                                                                                                                                                                    | NR                                                                                                                                                                                                         |                                                                                                                                 |
| <b>Oussalah 2010[28]</b>   | France                                              | Infliximab   | 191                     | 53 (27.8) | 13 (6.8) | NR                                                                                                                                                                                    | Number of adverse events leading to infliximab withdrawal 6 (3.1)                                                                                                                                          |                                                                                                                                 |
| <b>Herrlinger 2010[29]</b> | Germany                                             | Infliximab   | 24                      | 8 (66.7)  | 2 (8.3)  | NR                                                                                                                                                                                    | 2 (8.3) adverse events were judged as severe (allergic reaction and viral pneumonia) and therapy with infliximab was stopped.                                                                              |                                                                                                                                 |
| <b>Jurgens 2010[30]</b>    | Germany                                             | Infliximab   | 90                      | 9/90 (10) | NR       | Side effects likely to be related to IFX treatment were arthralgia (n= 2), nausea and vomiting (n= 4), and viral respiratory infection (n = 3). Allergic infusion reaction: 9/90 (10) | In one case, delayed IFX-induced reaction was observed to appear as generalised exanthema. Therefore, IFX therapy was discontinued in this patient (after receiving a total number of nine IFX infusions). |                                                                                                                                 |

|                          |                                                                                                                                                 |                          |     |            |           |                                                                                |                                                            |                                                                                                                                                                                                                                                       |
|--------------------------|-------------------------------------------------------------------------------------------------------------------------------------------------|--------------------------|-----|------------|-----------|--------------------------------------------------------------------------------|------------------------------------------------------------|-------------------------------------------------------------------------------------------------------------------------------------------------------------------------------------------------------------------------------------------------------|
| <b>Taxonera 2011[4]</b>  | Spain                                                                                                                                           | Adalimumab               | 30  | 6 (20)     | NR        | NR                                                                             | 15 (50)                                                    |                                                                                                                                                                                                                                                       |
| <b>Tursi 2010[74]</b>    | Italy                                                                                                                                           | Infliximab               | 23  | 2 (8.69)   | NR        | NR                                                                             | NR                                                         | One patient (4.34%) affected by left-sided colitis experienced headache, not requiring suspension of the treatment; another one patient affected by pancolitis developed sepsis by <i>Proteus</i> strain, requiring stopping treatment and colectomy. |
| <b>Gies 2010[31]</b>     | Canada                                                                                                                                          | Adalimumab (Induction)   | 25  | 1 (4)      | NR        | NR                                                                             | NR                                                         |                                                                                                                                                                                                                                                       |
| <b>Gies 2010[31]</b>     | Canada                                                                                                                                          | Infliximab (Induction)   | 28  | 2 (7.1)    | NR        | 1 (3.5)                                                                        | NR                                                         |                                                                                                                                                                                                                                                       |
| <b>Gies 2010[31]</b>     | Canada                                                                                                                                          | Adalimumab (Maintenance) | 20  | NR         | NR        | NR                                                                             | NR                                                         |                                                                                                                                                                                                                                                       |
| <b>Gies 2010[31]</b>     | Canada                                                                                                                                          | Infliximab (Maintenance) | 18  | 3 (33.3)   | NR        | 1 (5.5)                                                                        | NR                                                         |                                                                                                                                                                                                                                                       |
| <b>Afif 2009[1]</b>      | USA                                                                                                                                             | Adalimumab               | 20  | 17 (85)    | 6 (30)    | 0 (0)                                                                          | Nine patients with adverse events withdrew from the trial. |                                                                                                                                                                                                                                                       |
| <b>Sandborn 2009[34]</b> | Multinational (USA, Argentina, Australia, Austria, Belgium, Canada, Czech Republic, Denmark, France, Germany, Israel, Netherlands, New Zealand, | ACT 1 trial: Placebo     | 121 | 103 (85.1) | 31 (25.6) | Data was reported for adverse events occurring in >10% of any treatment group. |                                                            | 57                                                                                                                                                                                                                                                    |

|                          |                                                                                                                                                                  |                               |     |            |           |                                                                                |    |
|--------------------------|------------------------------------------------------------------------------------------------------------------------------------------------------------------|-------------------------------|-----|------------|-----------|--------------------------------------------------------------------------------|----|
|                          | Switzerland, UK)                                                                                                                                                 |                               |     |            |           |                                                                                |    |
| <b>Sandborn 2009[34]</b> | Multinational (USA, Argentina, Australia, Austria, Belgium, Canada, Czech Republic, Denmark, France, Germany, Israel, Netherlands, New Zealand, Switzerland, UK) | ACT 1 trial: 5 mg Infliximab  | 121 | 106 (87.6) | 26 (21.5) | Data was reported for adverse events occurring in >10% of any treatment group. | 39 |
| <b>Sandborn 2009[34]</b> | Multinational (USA, Argentina, Australia, Austria, Belgium, Canada, Czech Republic, Denmark, France, Germany, Israel, Netherlands, New Zealand, Switzerland, UK) | ACT 1 trial: 10 mg Infliximab | 122 | 111 (91)   | 29 (23.8) | Data was reported for adverse events occurring in >10% of any treatment group. | 39 |
| <b>Sandborn 2009[34]</b> | Multinational (USA, Argentina, Australia,                                                                                                                        | ACT 2 trial: Placebo          | 123 | 90 (73.2)  | 24 (19.5) | Data was reported for adverse events occurring in >10% of any treatment group. | 50 |

Austria,  
Belgium,  
Canada,  
Czech  
Republic,  
Denmark,  
France,  
Germany,  
Israel,  
Netherlands  
, New  
Zealand,  
Switzerland,  
UK)

|                              |                                                                                                                                                                                                                       |                                     |     |           |           |                                                                                         |    |
|------------------------------|-----------------------------------------------------------------------------------------------------------------------------------------------------------------------------------------------------------------------|-------------------------------------|-----|-----------|-----------|-----------------------------------------------------------------------------------------|----|
| <b>Sandborn<br/>2009[34]</b> | Multination<br>al (USA,<br>Argentina,<br>Australia,<br>Austria,<br>Belgium,<br>Canada,<br>Czech<br>Republic,<br>Denmark,<br>France,<br>Germany,<br>Israel,<br>Netherlands<br>, New<br>Zealand,<br>Switzerland,<br>UK) | ACT 2 trial:<br>5 mg<br>Infliximab  | 121 | 99 (81.8) | 13 (10.7) | Data was reported<br>for adverse events<br>occurring in >10% of<br>any treatment group. | 24 |
| <b>Sandborn<br/>2009[34]</b> | Multination<br>al (USA,<br>Argentina,<br>Australia,<br>Austria,<br>Belgium,<br>Canada,<br>Czech<br>Republic,<br>Denmark,<br>France,                                                                                   | ACT 2 trial:<br>10 mg<br>Infliximab | 120 | 96 (80)   | 11 (9.2)  | Data was reported<br>for adverse events<br>occurring in >10% of<br>any treatment group. | 24 |

Germany,  
Israel,  
Netherlands  
, New  
Zealand,  
Switzerland,  
UK)

|                         |        |                      |    |                                                                                                                                                                                                                                                   |                                                                              |    |                                                                              |                                                                                                                                                                                                                                                       |
|-------------------------|--------|----------------------|----|---------------------------------------------------------------------------------------------------------------------------------------------------------------------------------------------------------------------------------------------------|------------------------------------------------------------------------------|----|------------------------------------------------------------------------------|-------------------------------------------------------------------------------------------------------------------------------------------------------------------------------------------------------------------------------------------------------|
| <b>Maser 2008[36]</b>   | USA    | Infliximab-salvage   | 10 | NR                                                                                                                                                                                                                                                | Sepsis and died: 1/10 (10)                                                   | NR | NR                                                                           | Adverse events were attributed to acute salvage therapy if they occurred within 4 weeks of receiving the salvage drug and if they were thought to be caused by immune suppression or known metabolic toxicities of either cyclosporine or infliximab. |
| <b>Maser 2008[36]</b>   | USA    | Ciclosporine-salvage | 9  | Minor adverse events: 3/9 (33.33)<br>Fatigue, leg cramps, weakness - 1 patient<br>Fatigue and tingling in fingers - 1 patient<br>Nonproductive cough for 3 weeks after cyclosporine salvage without evidence of infection - 1 patient<br>5 (38.5) | Herpetic esophagitis: 1/9 (11.1)<br>Pancreatitis and bacteraemia: 1/9 (11.1) | NR | NR                                                                           |                                                                                                                                                                                                                                                       |
| <b>Oussalah 2008[2]</b> | France | Adalimumab           | 13 | Adverse events<br>Labial herpes and arthralgia: 1<br>Psoriasis de novo: 1<br>Erysipelas: 1<br>Urinary tract                                                                                                                                       | 0 (0)                                                                        | NR | ADA Withdrawal due to adverse event (exacerbation of psoriasis): 1/13 (7.69) |                                                                                                                                                                                                                                                       |



|                         |                                |                  |    |                                                                       |                                                                                                                                                                                                                             |    |    |  |                                                                                                                                                                                                                                                                                                                                                                                |
|-------------------------|--------------------------------|------------------|----|-----------------------------------------------------------------------|-----------------------------------------------------------------------------------------------------------------------------------------------------------------------------------------------------------------------------|----|----|--|--------------------------------------------------------------------------------------------------------------------------------------------------------------------------------------------------------------------------------------------------------------------------------------------------------------------------------------------------------------------------------|
|                         |                                |                  |    |                                                                       | infection: 1<br>Exacerbation of psoriasis: 1                                                                                                                                                                                |    |    |  |                                                                                                                                                                                                                                                                                                                                                                                |
|                         |                                |                  |    |                                                                       | 9/30 (30)                                                                                                                                                                                                                   |    |    |  | Infection - 4 (13)<br>Cutaneous herpes -2 (7) (1 case associated with keratitis)<br>Oesophageal candidosis and a superinfection of colitis by cytomegalovirus - 1 (3)<br>Bronchitis requiring a short hospitalization 4 months after the infliximab infusion - 1 (3)<br><br>Minor adverse events possibly related to infliximab<br>Headache: 1 (3)<br>Delayed urticaria: 1 (3) |
| <b>Gornet 2003[38]</b>  | France                         | Infliximab       | 30 | These patients experienced adverse events during the follow-up period | NR                                                                                                                                                                                                                          | NR | NR |  |                                                                                                                                                                                                                                                                                                                                                                                |
|                         |                                |                  |    |                                                                       | Two serious adverse events, which qualified as life threatening or severe, were recorded. One patient suffered septic complications. Another underwent colectomy because of toxic exacerbation and spontaneous perforation. |    |    |  |                                                                                                                                                                                                                                                                                                                                                                                |
| <b>Probert 2003[39]</b> | Multinational (UK and Germany) | Placebo group    | 20 | NR                                                                    |                                                                                                                                                                                                                             | NR | NR |  |                                                                                                                                                                                                                                                                                                                                                                                |
| <b>Probert 2003[39]</b> | Multinational (UK and Germany) | Infliximab group | 23 | NR                                                                    |                                                                                                                                                                                                                             | NR | NR |  | All other serious adverse events were rated as mild and were not significantly different in frequency between infliximab and placebo treated patients.                                                                                                                                                                                                                         |

No significant infusion reactions were seen.

|                            |         |                                                            |    |                                                                                                                                                                                                                                                               |    |                                         |    |
|----------------------------|---------|------------------------------------------------------------|----|---------------------------------------------------------------------------------------------------------------------------------------------------------------------------------------------------------------------------------------------------------------|----|-----------------------------------------|----|
| <b>Steenholdt 2013[75]</b> | Denmark | Infliximab: UC patients in remission                       | 10 | NR                                                                                                                                                                                                                                                            | NR | Infusion reaction to infliximab: 0 (0)  | NR |
| <b>Steenholdt 2013[75]</b> | Denmark | Infliximab: UC patients not in remission                   | 12 | NR                                                                                                                                                                                                                                                            | NR | Infusion reaction to infliximab: 3 (25) | NR |
| <b>Cottone 2011[76]</b>    | Italy   | UC (Elderly patients treated with biologics)               | 37 | Eleven severe infections (4 cases of pneumonia, 2 abscesses, 2 severe sepsis, 1 case of tuberculosis, 1 case of aspergillosis, and 1 case of interstitial pneumonia) and 3 cancers (rectal cancer, prostatic cancer, and basal cell carcinoma) were reported. | NR | NR                                      | NR |
| <b>Cottone 2011[76]</b>    | Italy   | UC (Adult matched control subjects treated with biologics) | 74 | Thirteen (7%) minor infections, no neoplasms, and 2 (1%) deaths (due to postoperative complications) were also observed.                                                                                                                                      | NR | NR                                      | NR |
| <b>Cottone 2011[76]</b>    | Italy   | UC (Elderly control subjects not treated with biologics)   | 74 | NR                                                                                                                                                                                                                                                            | NR | NR                                      | NR |

### **3B. Data on adverse events in Crohn's Disease**

Data for any AEs, serious AEs and withdrawals for CD patients are reported in Table S6.

The range of reported AE data was generally wide, reflecting significant variation in the nature and design of the various clinical studies (different sample sizes, study designs and follow-up periods) and in the time points of assessment (e.g. induction versus maintenance stages of treatment). The wide variation in AEs could also be due to the difference in type of AEs as reported in the studies.

Any AEs occurred in 7.69% (Tursi 2010[74]) to 94.6% (Rutgeerts 1999[77]) of CD patients treated with infliximab and in 0.5% (1 out of 181 patients; Reenaers 2012[7]) to 96.3% (251 out of 261 patients; CHARM trial [Colombel 2009[78]]) of CD patients treated with adalimumab. The lower limit, 0.5% (1 out of 181 patients) was a severe AE from a retrospective study evaluating adalimumab maintenance therapy for 12 months (Reenaers 2012[7]). The higher limit, 96.3% (251 out of 261 patients) was for any AEs from a RCT evaluating the safety profile of adalimumab induction therapy over 56 weeks (in this study, AEs occurred when patients switched to open-label therapy) (CHARM [Colombel 2009[78]]). If this study (Reenaers 2012[7]) is excluded from the qualitative reporting, the lower range changes to 12.6% with adalimumab therapy for any AEs (Chapparo 2012[51]).

In the CARE trial (Louis 2013[5]), 19.2% of patients experienced serious AEs, which may be attributable to the disease severity of included patients (moderate to severe). Among the serious AEs reported in this study, the most common serious infections were abscesses. A total of 47.3% of patients experienced AEs related to adalimumab. A total of 17% patients withdrew from the study. In the ACCESS-trial (Panaccione 2011[14]), a total of 47.4% patients experienced AEs related to adalimumab.

In the WELCOME trial (Sandborn 2010[10]), 7.4% patients experienced serious AEs with certolizumab induction therapy, 10.8% patients experienced AEs related to certolizumab maintenance therapy administered every two weeks and 12.8% patients experienced AEs related to certolizumab maintenance therapy administered every four weeks.

**Table S6. Adverse events in Crohn's Disease**

| Study name                        | Countries                                                                                                                                                               | Treatment groups | No. of patients | Any adverse events (n, %)                                                                                                                                                                                                                                                               | Serious adverse events (n, %) | Adverse events related to treatment (n, %) | Total withdrawals (due to lack of tolerance to treatment/any adverse events/ serious adverse events related to inadequate treatment response)                                                                                                            | Comments                                                                                                                                                                                                                                                                                                                                                              |
|-----------------------------------|-------------------------------------------------------------------------------------------------------------------------------------------------------------------------|------------------|-----------------|-----------------------------------------------------------------------------------------------------------------------------------------------------------------------------------------------------------------------------------------------------------------------------------------|-------------------------------|--------------------------------------------|----------------------------------------------------------------------------------------------------------------------------------------------------------------------------------------------------------------------------------------------------------|-----------------------------------------------------------------------------------------------------------------------------------------------------------------------------------------------------------------------------------------------------------------------------------------------------------------------------------------------------------------------|
| <b>CARE Trial (Louis 2013)[5]</b> | Multinational (Austria, Belgium, Czech Republic, Denmark, Finland, France, Germany, Greece, Ireland, Italy, Norway, Portugal, Slovakia, Spain, Sweden, Switzerland, UK) | Adalimumab       | 945             | 754 (79.8)                                                                                                                                                                                                                                                                              | 181 (19.2)                    | 447 (47.3)                                 | 160 (17)<br>Reasons for discontinuation: n (%)<br>Adverse events: 57 (6)<br>Lack of efficacy: 54 (5.7)<br>Protocol violations: 24 (2.5)<br>Other reasons: 14 (1.5)<br>Withdrew consent: 8 (0.8)<br>Lost to follow-up: 2 (0.2)<br>Administrative: 1 (0.1) |                                                                                                                                                                                                                                                                                                                                                                       |
| <b>Lindsay 2013[42]</b>           | UK                                                                                                                                                                      | Infliximab       | 380             | NR                                                                                                                                                                                                                                                                                      | 10 (2.6)                      | NR                                         | NR                                                                                                                                                                                                                                                       | 25 infusion-related SAEs were experienced by 10 patients during the study.<br>6 cancer-related SAEs<br>8 infection-related SAEs                                                                                                                                                                                                                                       |
| <b>Seminario 2013[45]</b>         | USA                                                                                                                                                                     | Infliximab       | 492             | Infectious adverse events with infliximab treatment, n (%)<br>Major<br>Septic shock: 3 (0.6)<br>Septicemia: 6 (1)<br>Abscess (abdominal or pelvic)<br>1 Abscess: 47 (10)<br>2 Abscesses: 8 (2)<br>3 Abscesses: 1 (0.2)<br>Tuberculosis: 0 (0)<br>Other mycobacterial infection: 1 (0.2) | NR                            | NR                                         | NR                                                                                                                                                                                                                                                       | All adverse events were compiled over the entire study period but counted as an adverse event only when they occurred within 12 weeks of infliximab exposure (with the exceptions of malignancy and death, which were captured at any time during follow-up). Therefore, all adverse events noted were considered as being possibly associated with infliximab usage. |

|  |  |  |  |                                                                                                                                                                                                                                                                                                                                                              |  |  |  |
|--|--|--|--|--------------------------------------------------------------------------------------------------------------------------------------------------------------------------------------------------------------------------------------------------------------------------------------------------------------------------------------------------------------|--|--|--|
|  |  |  |  | Histoplasmosis: 3 (1)<br>Other fungal infection: 10 (2)<br>Minor<br>Pneumonia: 15 (3)<br>Hepatitis: 2 (0.4)<br>Respiratory tract infection: 19 (4)<br>Escherichia coli infection: 4 (1)<br>Clostridium difficile infection: 4(1)<br>Other bacterial infection: 28 (5)<br>Herpes viral infection: 8 (2)<br>Other viral infection: 8 (2)<br>Candidiasis: 8 (2) |  |  |  |
|--|--|--|--|--------------------------------------------------------------------------------------------------------------------------------------------------------------------------------------------------------------------------------------------------------------------------------------------------------------------------------------------------------------|--|--|--|

|                          |     |             |    |          |          |    |         |                                                                                                                                                                                                                                                                                      |
|--------------------------|-----|-------------|----|----------|----------|----|---------|--------------------------------------------------------------------------------------------------------------------------------------------------------------------------------------------------------------------------------------------------------------------------------------|
| <b>Sakuraba 2013[47]</b> | USA | Natalizumab | 49 | 9 (18.4) | 5 (10.2) | NR | 25 (51) | No patient discontinued treatment because of infusion reactions.<br>Adverse reactions to Natalizumab:<br>Serious infections: 2/49 (4)<br>Recurrence of herpes simplex virus meningitis: 1/49 (2)<br>Sepsis: 1/49 (2)<br>Mild immediate hypersensitivity infusion reactions: 4/49 (8) |
|--------------------------|-----|-------------|----|----------|----------|----|---------|--------------------------------------------------------------------------------------------------------------------------------------------------------------------------------------------------------------------------------------------------------------------------------------|

|                       |       |            |    |    |                                                  |    |                                                                                                                                                                                   |
|-----------------------|-------|------------|----|----|--------------------------------------------------|----|-----------------------------------------------------------------------------------------------------------------------------------------------------------------------------------|
| <b>Zorzi 2012[48]</b> | Italy | Infliximab | 44 | NR | Induction: 13 (29.5)<br>Maintenance: 5/33 (15.2) | NR | Induction, Total withdrawals: 10;<br>No response: 2<br>Severe adverse events: 8 (18.2)<br>Maintenance, Total withdrawals: 10;<br>LOR: 5 (15.2)<br>Severe adverse events: 5 (15.2) |
|-----------------------|-------|------------|----|----|--------------------------------------------------|----|-----------------------------------------------------------------------------------------------------------------------------------------------------------------------------------|

|                       |       |            |    |                                                |                                  |    |                                                                                                                                       |
|-----------------------|-------|------------|----|------------------------------------------------|----------------------------------|----|---------------------------------------------------------------------------------------------------------------------------------------|
| <b>Zorzi 2012[48]</b> | Italy | Adalimumab | 49 | One patient developed herpes zoster infection. | Induction: 0 (0)<br>Maintenance: | NR | Induction, Total withdrawals: 0;<br>Maintenance, Total withdrawals: 16 (32.7);<br>LOR: 8 (24.2)<br>Delayed hypersensitivity reaction: |
|-----------------------|-------|------------|----|------------------------------------------------|----------------------------------|----|---------------------------------------------------------------------------------------------------------------------------------------|

1/33  
(6.1)

1 (2)  
Herpes Zoster Infection: 1 (2)  
Dysplasia of uterine cervix: 1(2)  
Lost to follow-up, ectopic pregnancy, remission while on combined azathioprine, low compliance or pregnancy, patients decision: 5 (10.2)

|                          |                                |                                                                         |     |           |    |    |                                                                                                                                                                                                                                                                                                                                               |                                                    |
|--------------------------|--------------------------------|-------------------------------------------------------------------------|-----|-----------|----|----|-----------------------------------------------------------------------------------------------------------------------------------------------------------------------------------------------------------------------------------------------------------------------------------------------------------------------------------------------|----------------------------------------------------|
| <b>Reenaers 2012[7]</b>  | Multinational (Belgium and UK) | Induction study                                                         | 207 | 0         | NR | NR | NR                                                                                                                                                                                                                                                                                                                                            |                                                    |
| <b>Reenaers 2012[7]</b>  | Multinational (Belgium and UK) | Maintenance study: Patients treated 12 months with ADA                  | 181 | 1 (0.5)   | NR | NR | NR                                                                                                                                                                                                                                                                                                                                            |                                                    |
| <b>Reenaers 2012[7]</b>  | Multinational (Belgium and UK) | Maintenance study: Patients treated with ADA+IS during the 1st semester | 45  | 1 (2)     | NR | NR | NR                                                                                                                                                                                                                                                                                                                                            |                                                    |
| <b>Chaparro 2012[79]</b> | Spain                          | Infliximab                                                              | 15  | 2 (13.3)  | NR | NR | NR                                                                                                                                                                                                                                                                                                                                            | Adalimumab discontinuation in 3 patients due to AE |
| <b>Sprakes 2012[46]</b>  | UK                             | Infliximab                                                              | 210 | 59 (28.1) | NR | NR | <p>During induction therapy<br/>Total withdrawals, n=37;<br/>Primary non-response: 18<br/>Intolerable adverse events: 10<br/>Other reasons: 9</p> <p>During continuation therapy<br/>Total withdrawals, n=59;<br/>Secondary non-response: 32<br/>Intolerable adverse events: 18<br/>Malignancy: 3<br/>Reactivation of varicella zoster: 2</p> | Infections: 14 (6.7)                               |

| Other reasons: 4                              |                                |                       |                                                         |                                                                                          |    |                                                                                                                     |                                                                                      |                                                                                                                                                                                                                                                                                                                                                                                                                                                                                                    |
|-----------------------------------------------|--------------------------------|-----------------------|---------------------------------------------------------|------------------------------------------------------------------------------------------|----|---------------------------------------------------------------------------------------------------------------------|--------------------------------------------------------------------------------------|----------------------------------------------------------------------------------------------------------------------------------------------------------------------------------------------------------------------------------------------------------------------------------------------------------------------------------------------------------------------------------------------------------------------------------------------------------------------------------------------------|
| <b>Chaparro 2012[51]</b>                      | Spain                          | Adalimumab            | 380<br>Anti-TNF naïve: 120<br>Anti-TNF experienced: 260 | Overall: 48 (12.6)<br>Anti-TNF naïve: 15/120 (12)<br>Anti-TNF experienced: 33/260 (12.7) | NR | NR                                                                                                                  | Overall: 12 (5.5)<br>Anti-TNF naïve: 9/120 (7)<br>Anti-TNF experienced: 12/260 (4.6) |                                                                                                                                                                                                                                                                                                                                                                                                                                                                                                    |
| <b>Chaparro 2012[52]</b>                      | Spain                          | Infliximab            | 33                                                      | Herpes zoster infection: 1/33 (3)<br>Infusion reaction after 36 doses: 1/33 (3)          | NR | NR                                                                                                                  | NR                                                                                   |                                                                                                                                                                                                                                                                                                                                                                                                                                                                                                    |
| <b>Barreiro-de-Acosta 2012[80]</b>            | Spain                          | Adalimumab            | 42                                                      | NR                                                                                       | NR | 4 (9.4): 2 (4.7) due to adverse events related to adalimumab, 2 (4.7) due to absence of CD response after 10 weeks. | NR                                                                                   |                                                                                                                                                                                                                                                                                                                                                                                                                                                                                                    |
| <b>TREAT registry (Lichtenstein 2012)[81]</b> | Multinational (USA and Canada) | Infliximab            | 3420                                                    | NR                                                                                       | NR | NR                                                                                                                  | 1819 (53.2)                                                                          | Of the 3,420 registry patients in the infliximab-treated group, 3,322 had data available for assessment of infusion reactions. Three percent (1,571 / 53,003) of infliximab infusions were associated with an infusion reaction; 0.047 % of reactions were serious.<br>Number of patients (number of events)<br>Neoplasia: 3,764 (139)<br>Mortality: 3,764 (109)<br>Serious infection: 3,420 (333)<br>Serious infection according to infliximab exposure within the previous 3 months: 2,942 (163) |
| <b>TREAT registry (Lichtenstein 2012)[81]</b> | Multinational (USA and Canada) | Other treatments only | 2853                                                    | NR                                                                                       | NR | NR                                                                                                                  | 1744 (61.1)                                                                          | Number of patients (number of events)<br>Neoplasia : 4,010 (113)<br>Mortality: 4,113 (82)                                                                                                                                                                                                                                                                                                                                                                                                          |

|                                                      |                                           |                |                                |            |              |            |                                                                                                                                                                                                                            |                                                                                                                                                                                                                       |
|------------------------------------------------------|-------------------------------------------|----------------|--------------------------------|------------|--------------|------------|----------------------------------------------------------------------------------------------------------------------------------------------------------------------------------------------------------------------------|-----------------------------------------------------------------------------------------------------------------------------------------------------------------------------------------------------------------------|
| nstein<br>2012)[8<br>1]                              |                                           |                |                                |            |              |            |                                                                                                                                                                                                                            | Serious infection: 4,557 (147)<br>Serious infection according to infliximab<br>exposure within the previous 3 months:<br>5,597 (317)                                                                                  |
| ACCESS<br>-trial<br>(Panac<br>cione<br>2011)[1<br>4] | Canada                                    | Adalimuma<br>b | 304                            | 242 (79.6) | 44<br>(14.4) | 144 (47.4) | Total withdrawals, n= 50:<br>Adverse events: 33 (10.9)<br>Withdrew consent: 6<br>Lost to follow-up: 2<br>Other reasons: 17                                                                                                 | Infections: 90 (29.6)                                                                                                                                                                                                 |
| Corder<br>o-Ruiz<br>2011[6<br>]                      | Spain                                     | Adalimuma<br>b | 25                             | 5 (20)     | 2 (8)        | NR         | In 5 patients (20%) adverse events<br>were observed, leading to drug<br>withdrawal in 2 cases (8%).<br>In 4 out of 25 patients (16%), ADA<br>was suspended before the end of<br>the follow-up period.                      |                                                                                                                                                                                                                       |
| Sprake<br>s<br>2011[5<br>6]                          | UK                                        | Adalimuma<br>b | 44                             | 9 (20.5)   | NR           | NR         | Nine (20.5%) patients were<br>classified as primary non-<br>responders to adalimumab, and<br>one patient had adalimumab<br>therapy withdrawn during<br>induction due to an adverse event<br>(a hypersensitivity reaction). |                                                                                                                                                                                                                       |
| Alzafiri<br>2011[2<br>7]                             | Canada                                    | Infliximab     | 71                             | NR         | NR           | NR         | NR                                                                                                                                                                                                                         |                                                                                                                                                                                                                       |
| Fortea-<br>Ormae<br>chea<br>2011[1<br>5]             | Spain                                     | Adalimuma<br>b | 174                            | 32 (18.4)  | 7 (21)       | NR         | Drug discontinuation due to<br>serious adverse events: 7 (21%),<br>anaphylactic reaction: 2, psoriasis<br>and loss of consciousness: 2                                                                                     | NR                                                                                                                                                                                                                    |
| Oussal<br>ah<br>2010[8<br>2]                         | France                                    | Infliximab     | 48                             | NR         | NR           | NR         | NR                                                                                                                                                                                                                         | 3 of 48 developed infliximab intolerance,<br>data already entered in first failure tab.                                                                                                                               |
| ADHER<br>E<br>(Panac<br>cione<br>2010)[5<br>9]       | Multinational<br>(Europe, USA,<br>Canada) | Placebo        | 261 (139<br>entered<br>ADHERE) | NR         | NR           | NR         | NR                                                                                                                                                                                                                         | Adverse events were reported in 94.1%<br>(804) of patients, 25.6% (219) of patients<br>experienced a serious adverse event and<br>20.4% (174) of patients discontinued from<br>the study because of an adverse event. |



|                                    |                                                                               |                               |                                           |           |           |    |                                                                                                                                                                                                                                                                                           |                                                                                                                                                                                                                                                                                 |
|------------------------------------|-------------------------------------------------------------------------------|-------------------------------|-------------------------------------------|-----------|-----------|----|-------------------------------------------------------------------------------------------------------------------------------------------------------------------------------------------------------------------------------------------------------------------------------------------|---------------------------------------------------------------------------------------------------------------------------------------------------------------------------------------------------------------------------------------------------------------------------------|
| <b>ADHERE (Panacione 2010)[59]</b> | Multinational (Europe, USA, Canada)                                           | Adalimumab eow                | 260 (144 entered ADHERE)                  | NR        | NR        | NR | NR                                                                                                                                                                                                                                                                                        |                                                                                                                                                                                                                                                                                 |
| <b>ADHERE (Panacione 2010)[59]</b> | Multinational (Europe, USA, Canada)                                           | Adalimumab weekly             | 257 (184 entered ADHERE)                  | NR        | NR        | NR | NR                                                                                                                                                                                                                                                                                        |                                                                                                                                                                                                                                                                                 |
| <b>Allez 2010[60]</b>              | Multinational (France, Belgium, Switzerland, European centres (Leuven, Roma)) | Certolizumab pegol/Adalimumab | 40/27                                     | 16 (24)   | 5 (7)     | NR | Total: 10 (15);<br>Cardiac failure: 1 (1.5),<br>Severe pulmonary infection: 1 (1.5),<br>Perianal abscess: 1 (1.5),<br>Inflammatory skin disorder: 4 (6),<br>Immediate hypersensitivity: 1 (1.5),<br>Delayed hypersensitivity: 1 (1.5),<br>Cough: 1 (1.5),<br>Diarrhea,<br>Nausea: 1 (1.5) | Data reported for combined population receiving third line therapy (N=67).                                                                                                                                                                                                      |
| <b>Tursi 2010[74]</b>              | Italy                                                                         | Infliximab                    | 39                                        | 3 (7.69)  | NR        | NR | NR                                                                                                                                                                                                                                                                                        | Two patients (5.13% of overall treated patients) experienced mild side-effects (one headache and one somnolence) not requiring suspension of the treatment; one patient experienced severe side-effects (cholestasis) at 12th month of treatment, requiring stopping treatment. |
| <b>Waugh 2010[83]</b>              | Canada                                                                        | Infliximab                    | 48 (patients who discontinued infliximab) | 7/43 (16) | NR        |    |                                                                                                                                                                                                                                                                                           |                                                                                                                                                                                                                                                                                 |
| <b>Sprakes 2010[61]</b>            | UK                                                                            | Infliximab                    | 100                                       | NR        | NR        | NR | At 12 months: 10/100 (10) discontinued therapy due to intolerable adverse events                                                                                                                                                                                                          |                                                                                                                                                                                                                                                                                 |
| <b>CHOICE-trial (Lichtig)</b>      | USA                                                                           | Adalimumab                    | 673                                       | NR        | 88 (13.1) | NR | At baseline:<br>Total withdrawals: 134 (19.9)<br>Adverse event: 28 (4.2)                                                                                                                                                                                                                  | Infectious SAEs: 22 (3.3)                                                                                                                                                                                                                                                       |

|                                                                     |                                                                                                                                                                  |                                                        |     |                                          |                                                |            |    |                                                                                                                                                                                                |                                                                                                                                |
|---------------------------------------------------------------------|------------------------------------------------------------------------------------------------------------------------------------------------------------------|--------------------------------------------------------|-----|------------------------------------------|------------------------------------------------|------------|----|------------------------------------------------------------------------------------------------------------------------------------------------------------------------------------------------|--------------------------------------------------------------------------------------------------------------------------------|
| er<br>2010][8<br>4]                                                 |                                                                                                                                                                  |                                                        |     |                                          |                                                |            |    | SAEs: 23 (3.4)<br>Withdrawal of consent: 33 (4.9)<br>Lost to follow-up: 24 (3.6)<br>Other: 38 (5.6)                                                                                            |                                                                                                                                |
| <b>WELCO<br/>ME<br/>trial<br/>(Sandb<br/>orn<br/>2010)[1<br/>0]</b> | Multinational<br>(Austria, Belgium,<br>Canada, Denmark,<br>France, Germany,<br>Italy, Norway,<br>Netherlands, Spain,<br>Sweden, Switzerland,<br>the UK, and USA) | Certolizum<br>ab<br>(Induction)                        | 539 | 436 (80.9)                               | 40<br>(7.4)                                    | 215 (39.9) |    | Total discontinuation, n=166<br>(30.8);<br>Due to loss of efficacy: 121 (22.4)<br>Withdrawal due to adverse<br>events; 37 (6.9)<br>Withdrawn consent: 5 (0.9)<br>Other: 3 (0.6)                | Infections: 142 (26.3)                                                                                                         |
| <b>WELCO<br/>ME<br/>trial<br/>(Sandb<br/>orn<br/>2010)[1<br/>0]</b> | Multinational<br>(Austria, Belgium,<br>Canada, Denmark,<br>France, Germany,<br>Italy, Norway,<br>Netherlands, Spain,<br>Sweden, Switzerland,<br>the UK, and USA) | Certolizum<br>ab (every 2<br>week,<br>maintenan<br>ce) | 186 | 145 (78)                                 | 20<br>(10.8)                                   | 63 (33.9)  |    | N=161<br>Total discontinuation, n=34 (21.1);<br>Due to loss of efficacy: 13 (8.1)<br>Withdrawal due to adverse<br>events: 15 (9.3)<br>Withdrawn consent: 4 (2.5)<br>Lost to follow-up: 2 (1.2) | Infections: 81 (43.5)                                                                                                          |
| <b>WELCO<br/>ME<br/>trial<br/>(Sandb<br/>orn<br/>2010)[1<br/>0]</b> | Multinational<br>(Austria, Belgium,<br>Canada, Denmark,<br>France, Germany,<br>Italy, Norway,<br>Netherlands, Spain,<br>Sweden, Switzerland,<br>the UK, and USA) | Certolizum<br>ab (every 4<br>week,<br>maintenan<br>ce) | 187 | 145 (77.5)                               | 24<br>(12.8)                                   | 73 (39)    |    | N=168<br>Total discontinuation, n=20<br>(12.3);<br>Due to loss of efficacy: 9 (5.4)<br>Withdrawal due to adverse<br>events: 9 (5.4)<br>Withdrawn consent: 0<br>Other: 2 (2.1)                  | Infections: 78 (41.7)                                                                                                          |
| <b>Russo<br/>2010[1<br/>6]</b>                                      | Multinational<br>(England/Ireland)                                                                                                                               | Adalimuma<br>b                                         | 61  | 14 (23)                                  | NR                                             | NR         |    | NR                                                                                                                                                                                             |                                                                                                                                |
| <b>Stein<br/>2010[6<br/>2]</b>                                      | USA                                                                                                                                                              | Infliximab                                             |     |                                          | Prior<br>Irregular (PI)<br>Exposure, n<br>= 40 | NR         | NR | NR                                                                                                                                                                                             | Overall, 12 (8%) of 147 patients had 16<br>acute infusion reactions. Nine patients<br>developed malignancies during follow-up. |
| <b>Echarri<br/>2010[1<br/>7]</b>                                    | Spain                                                                                                                                                            | Adalimuma<br>b                                         | 16  | 5 (31.25)                                | NR                                             | NR         |    | 1 (no response was achieved with<br>the change of adalimumab to a<br>weekly dose)                                                                                                              |                                                                                                                                |
| <b>Hamza<br/>oglu<br/>2010[6]</b>                                   | USA                                                                                                                                                              | Infliximab<br>without<br>Immunosu                      | 160 | overall data<br>mentioned in<br>comments | 16 (10)                                        | NR         |    | Overall in both the groups:<br>Treatment aborted 33 (11)                                                                                                                                       | Overall data:<br>Any adverse events 99 (33)<br>Serious adverse events 44 (14)                                                  |

|                                        |                                                                                |                                                  |     |            |           |    |                                                                                                          |                                                                                                                                                                                                                                                                                                                                                                                                                           |
|----------------------------------------|--------------------------------------------------------------------------------|--------------------------------------------------|-----|------------|-----------|----|----------------------------------------------------------------------------------------------------------|---------------------------------------------------------------------------------------------------------------------------------------------------------------------------------------------------------------------------------------------------------------------------------------------------------------------------------------------------------------------------------------------------------------------------|
| 3]                                     |                                                                                | ppressants                                       |     |            |           |    |                                                                                                          | The rate of serious adverse events was further analyzed among patients on concomitant immunosuppressants with respect to concomitant 6-MP/AZA therapy (n = 61 patients), concomitant corticosteroids (n =50 patients), and concomitant 6-MP, AZA, and corticosteroid therapy.<br>Infliximab + AZA/6MP: 14 adverse events<br>Infliximab + Steroids: 10 adverse events<br>Infliximab + AZA/6MP + Steroids: 4 adverse events |
| <b>Hamza oglu 2010[63]</b>             | USA                                                                            | Infliximab with Immunosuppressants               | 137 | NR         | 28 (20.4) | NR | Overall in both the groups:<br>Treatment aborted 33 (11)                                                 |                                                                                                                                                                                                                                                                                                                                                                                                                           |
| <b>CHARM Trial (Colombel 2009)[78]</b> | Multinational (conducted at 92 sites in Europe, the United States, and Canada) | Placebo (Adalimumab induction only/reinitiation) | 261 | 251 (96.3) | 70 (26.8) | NR | Total withdrawals: 48;<br>Lost to follow up: 2<br>Adverse events: 17<br>Lack of efficacy: 21<br>Other: 8 |                                                                                                                                                                                                                                                                                                                                                                                                                           |
| <b>CHARM Trial (Colombel 2009)[78]</b> | Multinational (conducted at 92 sites in Europe, the United States, and Canada) | Adalimumab 40 mg every other week                | 260 | 249 (95.8) | 45 (17.3) | NR | Total withdrawals: 56;<br>Lost to follow up: 0<br>Adverse events: 20<br>Lack of efficacy: 29<br>Other: 7 |                                                                                                                                                                                                                                                                                                                                                                                                                           |
| <b>CHARM Trial (Colombel 2009)[78]</b> | Multinational (conducted at 92 sites in Europe, the United States, and Canada) | Adalimumab 40 mg weekly                          | 257 | 245 (95.3) | 44 (17.1) | NR | Total withdrawals: 37;<br>Lost to follow up: 0<br>Adverse events: 16<br>Lack of efficacy: 13<br>Other: 8 |                                                                                                                                                                                                                                                                                                                                                                                                                           |
| <b>Ho 2009[19]</b>                     | Scotland                                                                       | Adalimumab                                       | 98  | 29 (29.6)  | 8 (8.2)   | NR | 10 (10.5)                                                                                                |                                                                                                                                                                                                                                                                                                                                                                                                                           |
| <b>West 2008[20]</b>                   | Netherlands                                                                    | Adalimumab                                       | 30  | 14 (47)    | NR        | NR | Six patients withdrew treatment due to adverse events.                                                   |                                                                                                                                                                                                                                                                                                                                                                                                                           |
| <b>Ho</b>                              | UK                                                                             | Adalimumab                                       | 22  | NR         | 3 (14)    | NR | One case of early withdrawal due                                                                         | A case of locally advanced nonsmall cell                                                                                                                                                                                                                                                                                                                                                                                  |

|                                       |                                              |                    |     |                                                                                                                                                                                                                                                                             |                                                                      |         |                                                                      |                                                                                                                                                                                                                                                                                               |                                                                                                                                                      |
|---------------------------------------|----------------------------------------------|--------------------|-----|-----------------------------------------------------------------------------------------------------------------------------------------------------------------------------------------------------------------------------------------------------------------------------|----------------------------------------------------------------------|---------|----------------------------------------------------------------------|-----------------------------------------------------------------------------------------------------------------------------------------------------------------------------------------------------------------------------------------------------------------------------------------------|------------------------------------------------------------------------------------------------------------------------------------------------------|
| 2008[12]                              |                                              | b                  |     |                                                                                                                                                                                                                                                                             |                                                                      |         |                                                                      | to severe injection site pain.                                                                                                                                                                                                                                                                | lung cancer developed in a 70-year-old female (34 cigarette pack-years) with CD colitis                                                              |
| <b>GAIN Trial (Sandborn 2007)[85]</b> | Multinational (USA, Canada, Belgium, France) | Adalimumab         | 159 | 91 (57)                                                                                                                                                                                                                                                                     | 2 (1)                                                                | 43 (27) |                                                                      | Total withdrawals: 4;<br>Adverse event: 2<br>Withdrew consent: 1<br>Protocol violation: 1                                                                                                                                                                                                     |                                                                                                                                                      |
| <b>GAIN Trial (Sandborn 2007)[85]</b> | Multinational (USA, Canada, Belgium, France) | Placebo            | 166 | 121 (73)                                                                                                                                                                                                                                                                    | 8 (5)                                                                | 53 (32) |                                                                      | Total withdrawals: 10;<br>Adverse event: 4<br>Withdrew consent: 1<br>Protocol violation: 5                                                                                                                                                                                                    |                                                                                                                                                      |
| <b>Peyrin-Biroulet 2007[21]</b>       | France                                       | Adalimumab         | 24  | 13 (54.2)                                                                                                                                                                                                                                                                   | 0 (0)                                                                | NR      |                                                                      | Patients discontinued adalimumab therapy: 6/24 (25)<br>LOR: 5/6 (83.3)<br>Intolerance 0/6 (0)<br>Other (Pregnancy): 1/6 (16.7)                                                                                                                                                                | All patients were able to tolerate adalimumab, including six who previously experienced acute or delayed hypersensitivity reactions with infliximab. |
| <b>Casellas 2007[86]</b>              | Spain                                        | Infliximab         | 49  | NR                                                                                                                                                                                                                                                                          | NR                                                                   | NR      |                                                                      | At 4 year follow-up: 43 (87.8)                                                                                                                                                                                                                                                                |                                                                                                                                                      |
| <b>Sands 2007[87]</b>                 | USA                                          | Placebo+Infliximab | 27  | Treatment-emergent AEs (adverse events that were newly acquired or that worsened during treatment with natalizumab or placebo): 27/27 (100)<br>Headache: 6 (22)<br>Fatigue: 2 (7)<br>Exacerbation of Crohn's disease: 4 (15)<br>Dizziness: 1 (4)<br>Nasopharyngitis: 3 (11) | 1 (4)<br>Serious AE were not related to natalizumab or to infliximab |         | Serious adverse event was not considered related to study treatment. | 4 (14.8) discontinued before completing the trial<br><br>Out of these, 2/4: remained in the study and completed assessments through week 10, and 2/4: completely withdrew from the study before week 10<br>Out of these 2, Withdrawal due to AE: 1 patient<br>Voluntary withdrawal: 1 patient | The total safety population comprised all patients who were randomized and had received at least 1 infusion of natalizumab or placebo (N = 79).      |

|                       |     |                        |    |                                                                                                                                                                                                                                                                                                                                                                                                        |                                                                       |                                                                                                                                                                                                                                                                                                       |
|-----------------------|-----|------------------------|----|--------------------------------------------------------------------------------------------------------------------------------------------------------------------------------------------------------------------------------------------------------------------------------------------------------------------------------------------------------------------------------------------------------|-----------------------------------------------------------------------|-------------------------------------------------------------------------------------------------------------------------------------------------------------------------------------------------------------------------------------------------------------------------------------------------------|
|                       |     |                        |    | <p>Nausea: 3 (11)<br/> DNA antibody positive: 3 (11)<br/> Dyspepsia: 1 (4)<br/> Abdominal pain: 0<br/> Antinuclear antibody positive: 1 (4)<br/> Arthralgia: 2 (7)<br/> Back pain: 2 (7)<br/> Insomnia: 1 (4)<br/> Pyrexia: 0<br/> Upper respiratory tract infection: 1 (4)<br/> Note: A patient was counted only once for each type of adverse event<br/> AEs associated with infection: 8/27(30)</p> |                                                                       |                                                                                                                                                                                                                                                                                                       |
| <b>Sands 2007[87]</b> | USA | Natalizumab+Infliximab | 52 | <p>Treatment-emergent AEs (adverse events that were newly acquired or that worsened during treatment with natalizumab or placebo): 48/52 (92)</p> <p>Within 120 minutes of receiving IFX, following reactions were experienced:<br/> Mild chest tightness: 1 (2)<br/> Mild chest pain: 1 (2)</p>                                                                                                       | 1 (2)<br>Serious AEs were not related to natalizumab or to infliximab | <p>7 (13.5) discontinued before completing the trial</p> <p>Out of these, 5/7: remained in the study and completed assessments through week 10, and 2/7: completely withdrew from the study before week 10<br/> Out of these 2, Voluntary withdrawal: 1 patient<br/> Lost to follow-up: 1 patient</p> |

Mild nausea: 1 (2)  
Flushing: 3 (6)

There were no hypersensitivity-like reactions reported within 120 minutes of administration of natalizumab.

Headache: 12 (23)  
Fatigue: 7 (13)  
Exacerbation of Crohn's disease: 5 (10)

Dizziness: 5 (10)  
Nasopharyngitis: 5 (10)

Nausea: 5 (10)  
DNA antibody positive: 4 (8)  
Dyspepsia: 4 (8)  
Abdominal pain: 3 (6)

Antinuclear antibody positive: 3 (6)

Arthralgia: 3 (6)  
Back pain: 3 (6)  
Insomnia: 3 (6)  
Pyrexia: 3 (6)  
Upper respiratory tract infection: 3 (6)

Note: A patient was counted only once for each type of adverse event

AEs associated with infection: 14/52 (27)

|                                    |                                                                               |                    |    |                                                                                                               |         |                                                                                                                                         |                                                                                          |
|------------------------------------|-------------------------------------------------------------------------------|--------------------|----|---------------------------------------------------------------------------------------------------------------|---------|-----------------------------------------------------------------------------------------------------------------------------------------|------------------------------------------------------------------------------------------|
| <b>Saro<br/>2007[6<br/>6]</b>      | Spain                                                                         | Infliximab         | 34 | 31 adverse events during treatment with infliximab, following 594 infusions of infliximab in the 34 patients. | NR      | NR                                                                                                                                      | For 3 patients the treatment with infliximab was discontinued because of adverse events. |
| <b>Rutgeerts<br/>2006[8<br/>8]</b> | Multinational (27 centres in 13 countries in North America, Europe, and Asia) | Placebo            | 37 | Patients experiencing at least 1 Adverse event: 26 (70.3)                                                     | 1 (2.7) | Patients experiencing at least 1 Drug-related adverse event: 19 (51.4)<br>Adverse event possibly related to anti-TNF therapy: 12 (32.4) | Withdrawal from the study due to adverse events: 3 (8.1)                                 |
| <b>Rutgeerts<br/>2006[8<br/>8]</b> | Multinational (27 centres in 13 countries in North America, Europe, and Asia) | Onercept;<br>10 mg | 44 | Patients experiencing at least 1 Adverse event: 31 (70.5)                                                     | 1 (2.3) | Patients experiencing at least 1 Drug-related adverse event: 25 (56.8)<br>Adverse event possibly related to anti-TNF therapy: 11 (25.0) | Withdrawal from the study due to adverse events: 3 (7)                                   |
| <b>Rutgeerts<br/>2006[8<br/>8]</b> | Multinational (27 centres in 13 countries in North America, Europe, and Asia) | Onercept;<br>25 mg | 42 | Patients experiencing at least 1 Adverse event: 28 (66.7)                                                     | 1 (2.4) | Patients experiencing at least 1 Drug-related adverse event: 22 (52.4)                                                                  | NR                                                                                       |

|                           |                                                                               |                           |    |                                                           |         |                                                                                                                                         |                                                                                                                                                                                                                                                                                       |
|---------------------------|-------------------------------------------------------------------------------|---------------------------|----|-----------------------------------------------------------|---------|-----------------------------------------------------------------------------------------------------------------------------------------|---------------------------------------------------------------------------------------------------------------------------------------------------------------------------------------------------------------------------------------------------------------------------------------|
|                           |                                                                               |                           |    |                                                           |         | Adverse event possibly related to anti-TNF therapy: 14 (33.3)                                                                           |                                                                                                                                                                                                                                                                                       |
| <b>Rutgeerts 2006[88]</b> | Multinational (27 centres in 13 countries in North America, Europe, and Asia) | Onercept; 35 mg           | 42 | Patients experiencing at least 1 Adverse event: 30 (71.4) | 3 (8.6) | Patients experiencing at least 1 Drug-related adverse event: 27 (64.3)<br>Adverse event possibly related to anti-TNF therapy: 12 (28.6) | Withdrawal from the study due to adverse events: 2 (4.8)                                                                                                                                                                                                                              |
| <b>Rutgeerts 2006[88]</b> | Multinational (27 centres in 13 countries in North America, Europe, and Asia) | Onercept; 50 mg           | 42 | Patients experiencing at least 1 Adverse event: 32 (76.2) | NR      | Patients experiencing at least 1 Drug-related adverse event: 25 (59.5)<br>Adverse event possibly related to anti-TNF therapy: 16 (38.1) | Withdrawal from the study due to adverse events: 2 (4.8)                                                                                                                                                                                                                              |
| <b>Leman 2006[89]</b>     | France                                                                        | Failure Stratum (Placebo) | 29 | Refer comments                                            | NR      | NR                                                                                                                                      | NR                                                                                                                                                                                                                                                                                    |
|                           |                                                                               |                           |    |                                                           |         |                                                                                                                                         | The percent of patients who had at least 1 adverse event was 51% (29 of 57) in the infliximab group and 50% (28 of 56) in the placebo group. The frequency of infection was similar in the 2 treatment groups. Of note, 5 serious adverse events were probably or possibly related to |



azathioprine. One patient in the infliximab group had a severe reaction after the second and third infusions (2%).

|                                                 |                                                          |                                                 |            |           |                |           |                                                                                                                                                                                                                                                                                                                                                                                                                                                                                              |                                                                                                                                                              |
|-------------------------------------------------|----------------------------------------------------------|-------------------------------------------------|------------|-----------|----------------|-----------|----------------------------------------------------------------------------------------------------------------------------------------------------------------------------------------------------------------------------------------------------------------------------------------------------------------------------------------------------------------------------------------------------------------------------------------------------------------------------------------------|--------------------------------------------------------------------------------------------------------------------------------------------------------------|
| <p><b>ACCENT I Trial (Rutgers 2004)[68]</b></p> | <p>Multinational (North America, Europe, and Israel)</p> | <p>Placebo (Episodic strategy)</p>              | <p>188</p> | <p>NR</p> | <p>55 (29)</p> | <p>NR</p> | <p>Maintenance treatment<br/>Discontinued treatment: 38 (20)<br/>Reason for discontinuation<br/>Noncompliance: 5 (3)<br/>Adverse event: 2 (1)<br/>Lack of efficacy: 23 (12)<br/>Other: 8 (4)<br/>Episodic retreatment (infliximab dosing during episodic retreatment was increased by 5 mg/kg above previous dose)<br/>Discontinued treatment: 36 (39)<br/>Reason for discontinuation<br/>Noncompliance: 10 (11)<br/>Adverse event: 3 (3)<br/>Lack of efficacy: 16 (17)<br/>Other: 7 (8)</p> |                                                                                                                                                              |
| <p><b>ACCENT I Trial (Rutgers 2004)[68]</b></p> | <p>Multinational (North America, Europe, and Israel)</p> | <p>Infliximab 5 mg/kg (Scheduled strategy)</p>  | <p>193</p> | <p>NR</p> | <p>54 (28)</p> | <p>NR</p> | <p>Maintenance treatment<br/>Discontinued treatment: 49 (26)<br/>Reason for discontinuation<br/>Noncompliance: 2 (1)<br/>Adverse event: 23 (12)<br/>Lack of efficacy: 19 (10)<br/>Other: 5 (3)<br/>Episodic retreatment (infliximab dosing during episodic retreatment was increased by 5 mg/kg above previous dose)<br/>Discontinued treatment: 24 (41)<br/>Reason for discontinuation<br/>Noncompliance: 4 (7)<br/>Adverse event: 5 (9)<br/>Lack of efficacy: 9 (16)<br/>Other: 6 (10)</p> | <p>One patient assigned to group III (10 mg/kg maintenance dose) actually received 5 mg/kg and was analysed for safety as (group II) infliximab 5 mg/kg.</p> |
| <p><b>ACCENT I Trial (Rutgers 2004)[68]</b></p> | <p>Multinational (North America, Europe, and Israel)</p> | <p>Infliximab 10 mg/kg (Scheduled strategy)</p> | <p>192</p> | <p>NR</p> | <p>43 (22)</p> | <p>NR</p> | <p>Maintenance treatment<br/>Discontinued treatment: 37 (19)<br/>Reason for discontinuation<br/>Noncompliance: 3 (2)<br/>Adverse event: 15 (8)</p>                                                                                                                                                                                                                                                                                                                                           |                                                                                                                                                              |

8]

Lack of efficacy: 12 (6)  
 Other: 7 (4)  
 Episodic retreatment (infliximab dosing during episodic retreatment was increased by 5 mg/kg above previous dose)  
 Discontinued treatment: 20 (39)  
 Reason for discontinuation  
 Noncompliance: 3 (6)  
 Adverse event: 2 (4)  
 Lack of efficacy: 6 (12)  
 Other: 9 (18)

|                                         |                                                   |                        |     |          |         |    |                                                                                                                                                                                                                                                                                                                                                                    |
|-----------------------------------------|---------------------------------------------------|------------------------|-----|----------|---------|----|--------------------------------------------------------------------------------------------------------------------------------------------------------------------------------------------------------------------------------------------------------------------------------------------------------------------------------------------------------------------|
| <b>ACCENT II Trial (Sands 2004)[69]</b> | Multinational (North America, Europe, and Israel) | Placebo maintenance    | 144 | 132 (92) | 33 (23) | NR | Adverse events leading to discontinuation of study agent: 12 (8)                                                                                                                                                                                                                                                                                                   |
| <b>ACCENT II Trial (Sands 2004)[69]</b> | Multinational (North America, Europe, and Israel) | Infliximab maintenance | 138 | 123 (89) | 19 (14) | NR | Adverse events leading to discontinuation of study agent: 5 (4)                                                                                                                                                                                                                                                                                                    |
| <b>Rodrigo 2004[90]</b>                 | Spain                                             | Infliximab             | 81  | NR       | NR      | NR | Total 79 episodes of any adverse events<br>No. of patients with adverse events not reported<br>During maintenance treatment intermittent development of antinuclear antibodies (ANA) in 11 of 45 patients (25%) was observed, however, none of them presented a "lupus-like" reaction.                                                                             |
| <b>Arnott 2001[71]</b>                  | UK                                                | Infliximab             | 39  | NR       | NR      | NR | Other immediate adverse events consisted of short-lived headaches in three patients. This was associated with nausea in one. Adverse events occurring after hospital discharge were a perianal abscess 4 days post-infusion in one patient, and pulmonary infection in the first month post-infusion in two. One patient had a documented urinary tract infection. |

|                            |                                          |                                          |                        |           |    |                                         |                                                                                                                                                                                                                                                                                                                                  |
|----------------------------|------------------------------------------|------------------------------------------|------------------------|-----------|----|-----------------------------------------|----------------------------------------------------------------------------------------------------------------------------------------------------------------------------------------------------------------------------------------------------------------------------------------------------------------------------------|
| <b>Arnott 2001[71]</b>     | UK                                       | Infliximab                               | 6                      | 1         | NR | NR                                      | NR                                                                                                                                                                                                                                                                                                                               |
| <b>Rutgeerts 1999[77]</b>  | Multinational (North America and Europe) | Infliximab                               | 37                     | 35 (94.6) | NR | NR                                      | NR                                                                                                                                                                                                                                                                                                                               |
| <b>Rutgeerts 1999[77]</b>  | Multinational (North America and Europe) | Placebo                                  | 36                     | 35 (97.2) | NR | NR                                      | NR                                                                                                                                                                                                                                                                                                                               |
| <b>Targan 1997[91]</b>     | Multinational (North America and Europe) | Infliximab                               | 102                    | 76 (75)   | NR | NR                                      | The 102 patients refers to initial 83 patients + patients 19 non-responder patients in placebo receiving open label infliximab.                                                                                                                                                                                                  |
| <b>Targan 1997[91]</b>     | Multinational (North America and Europe) | Placebo                                  | 25                     | 15 (60)   | NR | NR                                      | NR                                                                                                                                                                                                                                                                                                                               |
| <b>Steenholdt 2013[75]</b> | Denmark                                  | Infliximab: CD patients in remission     | 8                      | NR        | NR | Infusion reaction to infliximab: 0 (0)  | NR                                                                                                                                                                                                                                                                                                                               |
| <b>Steenholdt 2013[75]</b> | Denmark                                  | Infliximab: CD patients not in remission | 21                     | NR        | NR | Infusion reaction to infliximab: 4 (19) | NR                                                                                                                                                                                                                                                                                                                               |
| <b>Pearce 2007[92]</b>     | Australia                                | Infliximab                               | CD (Luminal alone): 32 | NR        | NR | NR                                      | NR                                                                                                                                                                                                                                                                                                                               |
|                            |                                          |                                          |                        |           |    |                                         | No serious adverse effects occurred in any patient with the induction therapy with infliximab. Adverse effects to the infliximab infusions occurred in three patients, one during a single induction dose and two during the three-dose induction course. These were all mild and transitory and required no specific treatment. |

## Section 4. Resource utilisation

### 4A.Data on resource utilisation in ulcerative colitis

Data for cost and resource utilisation for UC patients are presented in Table S7.

Resource utilisation (hospitalisations, surgical interventions, emergency room visits and radiology assessments) decreased significantly post-infliximab treatment compared to the pre-treatment period (Waters 2012[24]). The rates of hospitalisations in UC decreased from 15.1% (before infliximab treatment) to 3.5% (during infliximab treatment),  $p=0.0124$  (Waters 2012[24]).

Patients persistent to infliximab maintenance therapy required lesser hospitalisation compared with patients without persistence (3.0% versus 20.4%;  $p<0.001$ ). Hospitalised patients with persistent to infliximab maintenance therapy had significantly lower mean inpatient costs (\$14,243 versus \$32,745;  $p=0.046$ ), with a trend toward shorter mean lengths of stay (6.67 versus 9.71 days;  $p=0.147$ ) than patients without persistence (Carter 2011[93]).

**Table S7. Cost and Resource Utilisation in Ulcerative Colitis**

| Study name                       | Countries                                                                 | Treatment groups | No. of patients | Any adverse events (n, %) | Serious adverse events (n, %) | Adverse events related to treatment (n, %) | Total withdrawals (due to lack of tolerance to treatment/any adverse events/ serious adverse events related to inadequate treatment response)                                                                                           | Comments |
|----------------------------------|---------------------------------------------------------------------------|------------------|-----------------|---------------------------|-------------------------------|--------------------------------------------|-----------------------------------------------------------------------------------------------------------------------------------------------------------------------------------------------------------------------------------------|----------|
| ULTRA2 Trial (Sandborn 2013)[72] | Multinational (North America, Europe, Australia, New Zealand, and Israel) | Adalimumab       | 257             | 213 (82.9)                | 31 (12.1)                     | 101 (39.3)                                 | Discontinuation: 94 (36.4)<br>Reasons for discontinuation: n (%)<br>Lack of efficacy: 63 (24.4)<br>Adverse events: 12 (4.6)<br>Withdrew consent: 8 (3.1)<br>Lost to follow-up: 1 (0.3)<br>Protocol violation: 1 (0.3)<br>Other: 9 (3.4) |          |
| ULTRA2 Trial (Sandborn 2013)[72] | Multinational (North America, Europe, Australia, New Zealand, and Israel) | Placebo          | 260             | 218 (83.8)                | 32 (12.3)                     | 86 (33.1)                                  | Discontinuation: 115 (44.2)<br>Reasons for discontinuation: n (%)<br>Lack of efficacy: 70 (26.9)<br>Adverse events: 25 (9.6)<br>Withdrew consent: 4 (1.5)<br>Protocol violation: 5 (1.9)<br>Other: 11 (4.2)                             |          |

|                            |                                                     |              |                         |           |          |                                                                                                                                                                                          |                                                                                                                                                                                                            |                                                                                                                                 |
|----------------------------|-----------------------------------------------------|--------------|-------------------------|-----------|----------|------------------------------------------------------------------------------------------------------------------------------------------------------------------------------------------|------------------------------------------------------------------------------------------------------------------------------------------------------------------------------------------------------------|---------------------------------------------------------------------------------------------------------------------------------|
| <b>Chaparro 2012[23]</b>   | Spain                                               | Infliximab   | 47                      | 11 (23)   | NR       | NR                                                                                                                                                                                       | Of the 37 patients with an initial response to infliximab, 12 discontinued after a median of 10.5 months (range 1–20 months).                                                                              | Seven patients discontinued infliximab after the second infusion. Patients who discontinued infliximab remained on thiopurines. |
| <b>Mocciaro 2012[3]</b>    | Italy                                               | Cyclosporine | 35                      | 1 (2.9)   | 0        | NR                                                                                                                                                                                       | NR                                                                                                                                                                                                         |                                                                                                                                 |
| <b>Mocciaro 2012[3]</b>    | Italy                                               | Infliximab   | 30                      | 6 (20)    | 0        | NR                                                                                                                                                                                       | Total withdrawals: 6 due to adverse events                                                                                                                                                                 |                                                                                                                                 |
| <b>Rostholder 2012[25]</b> | USA                                                 | Infliximab   | 50 (maintenance cohort) | NR        | NR       | Infusion reactions: 5/50 (10)<br>Mild: 4/5<br>Acute: 3/5                                                                                                                                 | NR                                                                                                                                                                                                         |                                                                                                                                 |
| <b>Laharie 2012[26]</b>    | Multinational (France, Spain, Belgium, and Finland) | Ciclosporin  | 58                      | NR        | 9 (16)   | NR                                                                                                                                                                                       | NR                                                                                                                                                                                                         |                                                                                                                                 |
| <b>Laharie 2012[26]</b>    | Multinational (France, Spain, Belgium, and Finland) | Infliximab   | 57                      | NR        | 14 (25)  | NR                                                                                                                                                                                       | NR                                                                                                                                                                                                         |                                                                                                                                 |
| <b>Oussalah 2010[28]</b>   | France                                              | Infliximab   | 191                     | 53 (27.8) | 13 (6.8) | NR                                                                                                                                                                                       | Number of adverse events leading to infliximab withdrawal 6 (3.1)                                                                                                                                          |                                                                                                                                 |
| <b>Herrlinger 2010[29]</b> | Germany                                             | Infliximab   | 24                      | 8 (66.7)  | 2 (8.3)  | NR                                                                                                                                                                                       | 2 (8.3) adverse events were judged as severe (allergic reaction and viral pneumonia) and therapy with infliximab was stopped.                                                                              |                                                                                                                                 |
| <b>Jurgens 2010[30]</b>    | Germany                                             | Infliximab   | 90                      | 9/90 (10) | NR       | Side effects likely to be related to IFX treatment were arthralgia (n= 2), nausea and vomiting (n= 4), and viral respiratory infection (n = 3).<br>Allergic infusion reaction: 9/90 (10) | In one case, delayed IFX-induced reaction was observed to appear as generalised exanthema. Therefore, IFX therapy was discontinued in this patient (after receiving a total number of nine IFX infusions). |                                                                                                                                 |

|                          |                                                                                                                                                 |                          |     |            |           |                                                                                |         |                                                                                                                                                                                                                                                       |
|--------------------------|-------------------------------------------------------------------------------------------------------------------------------------------------|--------------------------|-----|------------|-----------|--------------------------------------------------------------------------------|---------|-------------------------------------------------------------------------------------------------------------------------------------------------------------------------------------------------------------------------------------------------------|
| <b>Taxonera 2011[4]</b>  | Spain                                                                                                                                           | Adalimumab               | 30  | 6 (20)     | NR        | NR                                                                             | 15 (50) |                                                                                                                                                                                                                                                       |
| <b>Tursi 2010[74]</b>    | Italy                                                                                                                                           | Infliximab               | 23  | 2 (8.69)   | NR        | NR                                                                             | NR      | One patient (4.34%) affected by left-sided colitis experienced headache, not requiring suspension of the treatment; another one patient affected by pancolitis developed sepsis by <i>Proteus</i> strain, requiring stopping treatment and colectomy. |
| <b>Gies 2010[31]</b>     | Canada                                                                                                                                          | Adalimumab (Induction)   | 25  | 1 (4)      | NR        | NR                                                                             | NR      |                                                                                                                                                                                                                                                       |
| <b>Gies 2010[31]</b>     | Canada                                                                                                                                          | Infliximab (Induction)   | 28  | 2 (7.1)    | NR        | 1 (3.5)                                                                        | NR      |                                                                                                                                                                                                                                                       |
| <b>Gies 2010[31]</b>     | Canada                                                                                                                                          | Adalimumab (Maintenance) | 20  | NR         | NR        | NR                                                                             | NR      |                                                                                                                                                                                                                                                       |
| <b>Gies 2010[31]</b>     | Canada                                                                                                                                          | Infliximab (Maintenance) | 18  | 3 (33.3)   | NR        | 1 (5.5)                                                                        | NR      |                                                                                                                                                                                                                                                       |
| <b>Afif 2009[1]</b>      | USA                                                                                                                                             | Adalimumab               | 20  | 17 (85)    | 6 (30)    | 0 (0)                                                                          |         | Nine patients with adverse events withdrew from the trial.                                                                                                                                                                                            |
| <b>Sandborn 2009[34]</b> | Multinational (USA, Argentina, Australia, Austria, Belgium, Canada, Czech Republic, Denmark, France, Germany, Israel, Netherlands, New Zealand, | ACT 1 trial: Placebo     | 121 | 103 (85.1) | 31 (25.6) | Data was reported for adverse events occurring in >10% of any treatment group. | 57      |                                                                                                                                                                                                                                                       |

|                          |                                                                                                                                                                  |                               |     |            |           |                                                                                |    |
|--------------------------|------------------------------------------------------------------------------------------------------------------------------------------------------------------|-------------------------------|-----|------------|-----------|--------------------------------------------------------------------------------|----|
|                          | Switzerland, UK)                                                                                                                                                 |                               |     |            |           |                                                                                |    |
| <b>Sandborn 2009[34]</b> | Multinational (USA, Argentina, Australia, Austria, Belgium, Canada, Czech Republic, Denmark, France, Germany, Israel, Netherlands, New Zealand, Switzerland, UK) | ACT 1 trial: 5 mg Infliximab  | 121 | 106 (87.6) | 26 (21.5) | Data was reported for adverse events occurring in >10% of any treatment group. | 39 |
| <b>Sandborn 2009[34]</b> | Multinational (USA, Argentina, Australia, Austria, Belgium, Canada, Czech Republic, Denmark, France, Germany, Israel, Netherlands, New Zealand, Switzerland, UK) | ACT 1 trial: 10 mg Infliximab | 122 | 111 (91)   | 29 (23.8) | Data was reported for adverse events occurring in >10% of any treatment group. | 39 |
| <b>Sandborn 2009[34]</b> | Multinational (USA, Argentina, Australia,                                                                                                                        | ACT 2 trial: Placebo          | 123 | 90 (73.2)  | 24 (19.5) | Data was reported for adverse events occurring in >10% of any treatment group. | 50 |

Austria,  
Belgium,  
Canada,  
Czech  
Republic,  
Denmark,  
France,  
Germany,  
Israel,  
Netherlands  
, New  
Zealand,  
Switzerland,  
UK)

|                              |                                                                                                                                                                                                                       |                                     |     |           |           |                                                                                         |    |
|------------------------------|-----------------------------------------------------------------------------------------------------------------------------------------------------------------------------------------------------------------------|-------------------------------------|-----|-----------|-----------|-----------------------------------------------------------------------------------------|----|
| <b>Sandborn<br/>2009[34]</b> | Multination<br>al (USA,<br>Argentina,<br>Australia,<br>Austria,<br>Belgium,<br>Canada,<br>Czech<br>Republic,<br>Denmark,<br>France,<br>Germany,<br>Israel,<br>Netherlands<br>, New<br>Zealand,<br>Switzerland,<br>UK) | ACT 2 trial:<br>5 mg<br>Infliximab  | 121 | 99 (81.8) | 13 (10.7) | Data was reported<br>for adverse events<br>occurring in >10% of<br>any treatment group. | 24 |
| <b>Sandborn<br/>2009[34]</b> | Multination<br>al (USA,<br>Argentina,<br>Australia,<br>Austria,<br>Belgium,<br>Canada,<br>Czech<br>Republic,<br>Denmark,<br>France,                                                                                   | ACT 2 trial:<br>10 mg<br>Infliximab | 120 | 96 (80)   | 11 (9.2)  | Data was reported<br>for adverse events<br>occurring in >10% of<br>any treatment group. | 24 |



Germany,  
Israel,  
Netherlands  
, New  
Zealand,  
Switzerland,  
UK)

|                         |        |                      |    |                                                                                                                                                                                                                                                   |                                                                              |    |                                                                              |                                                                                                                                                                                                                                                       |
|-------------------------|--------|----------------------|----|---------------------------------------------------------------------------------------------------------------------------------------------------------------------------------------------------------------------------------------------------|------------------------------------------------------------------------------|----|------------------------------------------------------------------------------|-------------------------------------------------------------------------------------------------------------------------------------------------------------------------------------------------------------------------------------------------------|
| <b>Maser 2008[36]</b>   | USA    | Infliximab-salvage   | 10 | NR                                                                                                                                                                                                                                                | Sepsis and died: 1/10 (10)                                                   | NR | NR                                                                           | Adverse events were attributed to acute salvage therapy if they occurred within 4 weeks of receiving the salvage drug and if they were thought to be caused by immune suppression or known metabolic toxicities of either cyclosporine or infliximab. |
| <b>Maser 2008[36]</b>   | USA    | Ciclosporine-salvage | 9  | Minor adverse events: 3/9 (33.33)<br>Fatigue, leg cramps, weakness - 1 patient<br>Fatigue and tingling in fingers - 1 patient<br>Nonproductive cough for 3 weeks after cyclosporine salvage without evidence of infection - 1 patient<br>5 (38.5) | Herpetic esophagitis: 1/9 (11.1)<br>Pancreatitis and bacteraemia: 1/9 (11.1) | NR | NR                                                                           |                                                                                                                                                                                                                                                       |
| <b>Oussalah 2008[2]</b> | France | Adalimumab           | 13 | Adverse events<br>Labial herpes and arthralgia: 1<br>Psoriasis de novo: 1<br>Erysipelas: 1<br>Urinary tract                                                                                                                                       | 0 (0)                                                                        | NR | ADA Withdrawal due to adverse event (exacerbation of psoriasis): 1/13 (7.69) |                                                                                                                                                                                                                                                       |

|                         |                                |                  |    |                                                                       |                                                                                                                                                                                                                             |    |    |    |                                                                                                                                                                                                                                                                                                                                                                                |
|-------------------------|--------------------------------|------------------|----|-----------------------------------------------------------------------|-----------------------------------------------------------------------------------------------------------------------------------------------------------------------------------------------------------------------------|----|----|----|--------------------------------------------------------------------------------------------------------------------------------------------------------------------------------------------------------------------------------------------------------------------------------------------------------------------------------------------------------------------------------|
|                         |                                |                  |    |                                                                       | infection: 1<br>Exacerbation of psoriasis: 1                                                                                                                                                                                |    |    |    |                                                                                                                                                                                                                                                                                                                                                                                |
|                         |                                |                  |    |                                                                       | 9/30 (30)                                                                                                                                                                                                                   |    |    |    | Infection - 4 (13)<br>Cutaneous herpes -2 (7) (1 case associated with keratitis)<br>Oesophageal candidosis and a superinfection of colitis by cytomegalovirus - 1 (3)<br>Bronchitis requiring a short hospitalization 4 months after the infliximab infusion - 1 (3)<br><br>Minor adverse events possibly related to infliximab<br>Headache: 1 (3)<br>Delayed urticaria: 1 (3) |
| <b>Gornet 2003[38]</b>  | France                         | Infliximab       | 30 | These patients experienced adverse events during the follow-up period | NR                                                                                                                                                                                                                          | NR | NR |    |                                                                                                                                                                                                                                                                                                                                                                                |
|                         |                                |                  |    |                                                                       | Two serious adverse events, which qualified as life threatening or severe, were recorded. One patient suffered septic complications. Another underwent colectomy because of toxic exacerbation and spontaneous perforation. |    | NR | NR |                                                                                                                                                                                                                                                                                                                                                                                |
| <b>Probert 2003[39]</b> | Multinational (UK and Germany) | Placebo group    | 20 | NR                                                                    |                                                                                                                                                                                                                             |    | NR | NR |                                                                                                                                                                                                                                                                                                                                                                                |
| <b>Probert 2003[39]</b> | Multinational (UK and Germany) | Infliximab group | 23 | NR                                                                    |                                                                                                                                                                                                                             | NR | NR | NR | All other serious adverse events were rated as mild and were not significantly different in frequency between infliximab and placebo treated patients.                                                                                                                                                                                                                         |

No significant infusion reactions were seen.

|                            |         |                                                            |    |                                                                                                                                                                                                                                                               |    |                                         |    |
|----------------------------|---------|------------------------------------------------------------|----|---------------------------------------------------------------------------------------------------------------------------------------------------------------------------------------------------------------------------------------------------------------|----|-----------------------------------------|----|
| <b>Steenholdt 2013[75]</b> | Denmark | Infliximab: UC patients in remission                       | 10 | NR                                                                                                                                                                                                                                                            | NR | Infusion reaction to infliximab: 0 (0)  | NR |
| <b>Steenholdt 2013[75]</b> | Denmark | Infliximab: UC patients not in remission                   | 12 | NR                                                                                                                                                                                                                                                            | NR | Infusion reaction to infliximab: 3 (25) | NR |
| <b>Cottone 2011[76]</b>    | Italy   | UC (Elderly patients treated with biologics)               | 37 | Eleven severe infections (4 cases of pneumonia, 2 abscesses, 2 severe sepsis, 1 case of tuberculosis, 1 case of aspergillosis, and 1 case of interstitial pneumonia) and 3 cancers (rectal cancer, prostatic cancer, and basal cell carcinoma) were reported. | NR | NR                                      | NR |
| <b>Cottone 2011[76]</b>    | Italy   | UC (Adult matched control subjects treated with biologics) | 74 | Thirteen (7%) minor infections, no neoplasms, and 2 (1%) deaths (due to postoperative complications) were also observed.                                                                                                                                      | NR | NR                                      | NR |
| <b>Cottone 2011[76]</b>    | Italy   | UC (Elderly control subjects not treated with biologics)   | 74 | NR                                                                                                                                                                                                                                                            | NR | NR                                      | NR |

#### **4B. Data on resource utilisation in Crohn's Disease**

Data for cost and resource utilisation for CD patients are presented in Table S8.

Most of the studies reported data for direct costs. However, in the CARE trial (Louis 2013), indirect costs were reported as assessed by the WPAI scale. Costs of CD component for absenteeism, presenteeism and total work productivity impairment were €1180, €2408 and €2577, respectively. The estimated indirect cost savings were highest when adalimumab was administered as a first-line agent in infliximab-naïve patients. The cost-analysis in this study did not take into account medication cost for patients who required dosage increases, and also included the patients who were in employment throughout the study. Therefore, costs of unemployment may be underestimated.

For resource utilisation, a study reported significant difference in mean (SD) number of hospitalisations for step up and early bio group as 0.38 (0.8) and 0.81 (1.12),  $p=0.04$ , respectively (Ghazi 2013[44]). The early bio group had higher disease activity scores at baseline; therefore the higher hospitalisation rate may be associated with higher disease activity in this group.

Overall healthcare costs and resource utilisation (number of hospital visits, surgical procedures, length of hospital stay, drug treatment [days/year]) decreased significantly post-infliximab or post-adalimumab treatment compared to the pre-treatment period (Lindsay 2013[42], Water 2012[24], COMPAIRS [Sussman 2012], Carter 2011[94], Loomes 2011[95], Sprakes 2010[61], Taxonera 2009, Saro 2007[66], Jewell 2005[67]). However, after accounting for the costs of infliximab or adalimumab, the overall healthcare cost increased significantly (COMPAIRS [Sussman 2012], Loomes 2011[95], Sprakes 2010[61], Kane 2009[96], Saro 2007[66]). The overall healthcare cost was lower with adalimumab compared to infliximab (COMPAIRS [Sussman 2012]).

One study (Nugent 2010[58]) reported that, compared to therapies other than anti-TNF $\alpha$ s, physician visits with an associated diagnosis IBD and the frequency of hospital admissions were more common with infliximab than with azathioprine and steroids. The physician visits also included the obligatory visits for drug administration. Some of these obligatory visits would have contributed to the persistent increase in IBD-associated physician visits with infliximab.

LOR was also associated with an increase in cost; those who did not experience LOR incurred \$24,532 as total costs, on average, whereas those who did experience LOR incurred 36% greater mean total costs (\$33,289). The cost difference (\$8,756) between the two groups was statistically significant,  $p<0.001$  (Wu 2008[97]).

**Table S8. Cost and Resource Use in Crohn's Disease Patients**

| Study name                        | Treatment groups | No. of patients | Direct costs (cost associated with treatment/management, concomitant medications, adverse events, office visits, hospitalisations related to "TNF failure patients"); p value                                                                                                                                                                                                                                                                                                                                                     | Indirect costs (productivity loss/ absenteeism) for anti-TNF inadequate responders/failure; p value                       | Overall total drug costs and total costs of patients initiating anti-TNFs | Resource utilisation                                                                                                                                                                                                                                                                                                                                                                                                                                                                         | Comments |
|-----------------------------------|------------------|-----------------|-----------------------------------------------------------------------------------------------------------------------------------------------------------------------------------------------------------------------------------------------------------------------------------------------------------------------------------------------------------------------------------------------------------------------------------------------------------------------------------------------------------------------------------|---------------------------------------------------------------------------------------------------------------------------|---------------------------------------------------------------------------|----------------------------------------------------------------------------------------------------------------------------------------------------------------------------------------------------------------------------------------------------------------------------------------------------------------------------------------------------------------------------------------------------------------------------------------------------------------------------------------------|----------|
| <b>CARE Trial (Louis 2013)[5]</b> | Adalimumab       | 945             | NR                                                                                                                                                                                                                                                                                                                                                                                                                                                                                                                                | WPAI: Crohn's disease component<br>Absenteeism: €1180<br>Presenteeism: €2408<br>Total work productivity impairment: €2577 | NR                                                                        | NR                                                                                                                                                                                                                                                                                                                                                                                                                                                                                           |          |
| <b>Ghazi 2013[4]</b>              | Step Up          | 39              | NR                                                                                                                                                                                                                                                                                                                                                                                                                                                                                                                                | NR                                                                                                                        | NR                                                                        | At 1 year, Mean (SD): 0.38 (0.8) hospitalisations                                                                                                                                                                                                                                                                                                                                                                                                                                            |          |
| <b>Ghazi 2013[4]</b>              | Early Bio        | 54              | NR                                                                                                                                                                                                                                                                                                                                                                                                                                                                                                                                | NR                                                                                                                        | NR                                                                        | At 1 year, Mean (SD): 0.81 (1.12) hospitalisations; $p=0.04$                                                                                                                                                                                                                                                                                                                                                                                                                                 |          |
| <b>Lindsay 2013[4]</b>            | Infliximab       | 380             | Pre- vs. Post-Infliximab elective procedures, annualised rates: £752.46 vs. £539.23<br>Pre- vs. Post-Infliximab all hospitalisations, annualised rates: £1908.85 vs. £1194.01, $p<0.0001$<br>Pre- vs. Post-Infliximab all non-elective/emergency hospitalisations, annualised rates: £1107.65 vs. £630.71, $p<0.0001$<br>Pre- vs. Post-Infliximab all outpatient consultations, annualised rates: £913.48 vs. £832.23, $p<0.0001$<br>Pre- vs. Post-Infliximab diagnostic tests consultations, annualised rates: £411 vs. £190.04, | NR                                                                                                                        | NR                                                                        | Pre-infliximab (0-12 months) vs. Post-infliximab (0-24 months)<br>Pre- vs. Post-Infliximab elective hospitalisation, Mean (SD): 0.18 (0.5) vs. 0.11 (0.26), $p=0.0035$<br>Pre- vs. Post-Infliximab non-elective hospitalisation, Mean (SD): 0.46 (0.79) vs. 0.29 (0.5), $p<0.0001$<br>Pre- vs. Post-Infliximab total number of elective hospitalisation: 68 vs. 42.5<br>Pre- vs. Post-Infliximab number (%) of patients with at least one elective hospitalisation: 52 (13.7) vs. 35.5 (9.3) |          |

$p < 0.0001$   
 Mean cost of Infliximab over 24 months: £7128.02  
 Total cost of Infliximab over 24 months: £2708467.10

Pre- vs. Post-Infliximab Gastroenterologist consultation, Mean (SD): 4 (2.4) vs. 3.5 (2.3),  $p < 0.0001$   
 Pre- vs. Post-Infliximab Gastrointestinal surgeon consultation, Mean (SD): 0.7 (1.4) vs. 0.5 (0.9),  $p = 0.0008$   
 Pre- vs. Post-Infliximab Radiologist consultation, Mean (SD): 0.5 (0.8) vs. 0.2 (0.5),  $p < 0.0001$   
 Pre- vs. Post-Infliximab Nurse (infliximab related) consultation, Mean (SD): 0 vs. 3.8 (2.7),  $p < 0.0001$   
 Pre- vs. Post-Infliximab Nurse (non-infliximab related) consultation, Mean (SD): 1.7 (3.7) vs. 1.3 (2.7),  $p = 0.0007$   
 Pre- vs. Post-Infliximab Dietician/nutritionist consultation, Mean (SD): 0.2 (0.7) vs. 0.1 (0.3),  $p = 0.0036$

Hospitalisation with CD as primary diagnosis: 245 (11.8)  
 In first year of follow-up: 165 (8)  
 Censoring follow-up 90 days after discontinuation of therapy: 163 (12.8)  
 Hospitalisation with CD as primary or secondary diagnosis: 369 (19.5)  
 In first year of follow-up: 284 (27.7)  
 Censoring follow-up 90 days after discontinuation of therapy: 283 (23.5)

Osterman 2014[43]

Infliximab

1459

NR

NR

NR

Osterman 2014[43]

Adalimumab

871

NR

NR

NR

Hospitalisation with CD as primary diagnosis: 185 (15.4)  
 In first year of follow-up: 117 (9.7)

|                                   |            |     |                                                                                                                                                                                                                                                                                                                                                                                                                                                                                                                   |    |                                                                                                                                                                                                                                                                                                               |                                                                                                                                                                                                                                                                                                                                                                                                                                                                                                                                                                                                                                       |                                                                                                                                                                                                                                                                                                                               |
|-----------------------------------|------------|-----|-------------------------------------------------------------------------------------------------------------------------------------------------------------------------------------------------------------------------------------------------------------------------------------------------------------------------------------------------------------------------------------------------------------------------------------------------------------------------------------------------------------------|----|---------------------------------------------------------------------------------------------------------------------------------------------------------------------------------------------------------------------------------------------------------------------------------------------------------------|---------------------------------------------------------------------------------------------------------------------------------------------------------------------------------------------------------------------------------------------------------------------------------------------------------------------------------------------------------------------------------------------------------------------------------------------------------------------------------------------------------------------------------------------------------------------------------------------------------------------------------------|-------------------------------------------------------------------------------------------------------------------------------------------------------------------------------------------------------------------------------------------------------------------------------------------------------------------------------|
|                                   |            |     |                                                                                                                                                                                                                                                                                                                                                                                                                                                                                                                   |    |                                                                                                                                                                                                                                                                                                               |                                                                                                                                                                                                                                                                                                                                                                                                                                                                                                                                                                                                                                       | <p>Censoring follow-up 90 days after discontinuation of therapy: 101 (16)</p> <p>Hospitalisation with CD as primary or secondary diagnosis: 263 (24)</p> <p>In first year of follow-up: 178 (29.1)</p> <p>Censoring follow-up 90 days after discontinuation of therapy: 165 (27.8)</p>                                        |
| <b>Waters 2012[24]</b>            | Infliximab | 182 | <p>Hospitalisation cost saving post-infliximab: \$29061</p> <p>Surgery related cost saving post-infliximab: \$36936</p> <p>Emergency room visit related cost addition post-infliximab: \$194</p> <p>Radiological assessment related cost saving post-infliximab: \$6256</p> <p>Colonoscopy related cost saving post-infliximab: \$25518.96 to \$47228.97</p> <p>Esophagogastroduodenoscopy related cost saving post-infliximab: \$11413.17</p> <p>Sigmoidoscopy related cost saving post-infliximab: \$185.83</p> | NR | NR                                                                                                                                                                                                                                                                                                            | <p>Pre- vs. Post-Infliximab Hospitalisation: 19 (10.41) vs. 16 (8.8), <math>p=</math> Not significant</p> <p>Pre- vs. Post-Infliximab emergency room visit: 2 (1.1) vs. 4 (2.2), <math>p=</math> Not significant</p> <p>Pre- vs. Post-Infliximab radiology assessment: 42 (23.1) vs. 19 (10.4), <math>p=0.006</math></p> <p>Pre- vs. Post-Infliximab colonoscopy: 99 (54) vs. 32 (17.6), <math>p=0.0001</math></p> <p>Pre- vs. Post-Infliximab esophagogastroduodenoscopy: 18 (9.9) vs. 9 (4.9), <math>p=</math>Not significant</p> <p>Pre- vs. Post-Infliximab Sigmoidoscopy: 1 (0.5) vs. 0 (0), <math>p=</math> Not significant</p> |                                                                                                                                                                                                                                                                                                                               |
| <b>COMPAIRS (Susman 2012)[98]</b> | Adalimumab | 623 | <p>Pre- vs. Post-Adalimumab, Mean (SD)</p> <p>Index drug costs: NA vs. \$10,709 (\$4,979)</p> <p>Prescription drugs costs; Total prescription drug cost: \$1,374 (\$2,420) vs. \$1,334 (\$1,892)</p> <p>Total CD-related drug cost: \$648 (\$867) vs. \$546 (\$916)</p> <p>Medical service-related costs; Hospitalisation: \$4,541 (\$23,031) vs. \$3,357 (\$14,809)</p>                                                                                                                                          | NR | <p>Pre- vs. Post-Adalimumab, Mean (SD)</p> <p>Total healthcare costs; Total healthcare costs: \$11,640 (\$27,088) vs. \$18,885 (\$21,049)</p> <p>Total healthcare costs, CD-related: \$8,849 (\$23,772) vs. \$16,454 (\$16,667)</p> <p>Post-Index Total healthcare costs excluding index drug, Mean (SD);</p> | <p>Pre- vs. Post-Adalimumab, Mean (SD)</p> <p>Hospitalisation; 6-Month rate, any cause, n (%): 138 (22) vs. 89 (14)</p> <p>6-Month rate, CD-related, n (%): 125 (20) vs. 81 (13)</p> <p>Hospitalisation days, any cause: 1.79 (5.3) vs. 1.24 (5.3)</p> <p>Hospitalisation days, CD-related: 1.65 (5.2) vs. 1.2 (5.2)</p>                                                                                                                                                                                                                                                                                                              | <p>Healthcare Utilisation; Adalimumab (n=296) vs. Infliximab (n=296), 12 months Post-Index Hospitalisation</p> <p>12-Month rate, any cause (n, %): 76 (26%) vs. 74 (25%), Difference: 1.03, <math>p=0.8500</math></p> <p>12-Month rate, CD-related (n, %): 68 (23%) vs. 65 (22%), Difference: 1.05, <math>p=0.7680</math></p> |

Hospitalisation, CD-related:  
\$4,170 (\$22,796) vs. \$3,257  
(\$14,770)  
ER visit: \$287 (\$1,084) vs. \$206  
(\$906)  
ER visit, CD-related: \$227  
(\$1,014) vs. \$136 (\$852)  
Outpatient / office visit: \$4,706  
(\$7,302) vs. \$2,482 (\$4,088)  
Outpatient / office visit, CD-  
related: \$3,583 (\$6,316) vs.  
\$1,579 (\$3,544)  
Other medical costs: \$732  
(\$10,723) vs. \$797 (\$11,722)  
Other medical costs, CD-related:  
\$220 (\$1,503) vs. \$227 (\$1,992)  
Total medical service costs:  
\$10,265 (\$26,869) vs. \$6,842  
(\$20,388)  
Total medical service costs, CD-  
related: \$8,201 (\$23,752) vs.  
\$5,199 (\$16,476)

Total healthcare costs \$8,176  
(\$20,822)  
Total healthcare costs, CD-  
related \$5,745 (\$16,503)

Number of hospital visits, any  
cause: 0.3 (0.7) vs. 0.2 (0.6)  
Number of hospital visits, CD-  
related: 0.27 (0.6) vs. 0.19  
(0.6)  
Emergency room visit;  
6-Month rate, any cause, n  
(%): 134 (22) vs. 113 (18)  
6-Month rate, CD-related, n  
(%): 89 (14) vs. 57 (9)  
Outpatient visits;  
Number of outpatient visits,  
any cause: 9.92 (7.1) vs. 8.84  
(7.4)  
Number of outpatient visits,  
CD-related: 5.36 (4.2) vs. 4.28  
(4.1)

Hospitalisation days, any  
cause, Mean (SD): 2.29  
(6.2) vs. 2.75 (7.3),  
Difference: -0.46,  $p=$   
0.9398  
Hospitalisation days, CD-  
related, Mean (SD): 2.14  
(6.1) vs. 2.52 (7.2),  
Difference: -0.38,  $p=$   
0.9266  
Number of hospital visits,  
any cause, Mean (SD): 0.4  
(0.9) vs. 0.39 (0.8),  
Difference: 0.01,  $p=$   
0.8681  
Number of hospital visits,  
CD-related, Mean (SD):  
0.36 (0.8) vs. 0.33 (0.8),  
Difference: 0.03,  $p=$   
0.7641  
Emergency room visit  
12-Month rate, any cause  
(n, %): 87 (29%) vs. 73  
(25%), Difference: 1.19,  
 $p=$  0.1950  
12-Month rate, CD-  
related (n, %): 44 (15%)  
vs. 40 (14%), Difference:  
1.10,  $p=$  0.6380  
Outpatient visits  
Number of outpatient  
visits, any cause, Mean  
(SD): 18.07 (14.1) vs.  
22.25 (13.7), Difference: -  
4.18,  $p<$ 0.0001  
Number of outpatient  
visits, CD-related, Mean  
(SD): 7.97 (7.2) vs. 12.23  
(5.8), Difference: -4.26,  
 $p<$ 0.0001

Healthcare costs (\$);  
Adalimumab (n=296) vs.



Infliximab (n=296), 12 months Post-Index Index drug costs, Mean (SD): \$18,330 (\$7,928) vs. \$19,881 (\$40,174), Difference: -\$1,550,  $p=0.0005^*$

Prescription drugs costs excluding index drug, Mean (SD)

Total prescription drug costs: \$2,810 (\$3,778) vs. \$4,758 (\$17,778), Difference: -\$1,948,  $p=0.3133$

Total CD-related drug costs: \$993 (\$1,408) vs. \$2,254 (\$4,468), Difference: -\$1,261,  $p=0.2874$

Medical service-related costs excluding index drug Mean (SD)

Hospitalisation: \$6,655 (\$20,020) vs. \$8,569 (\$38,009), Difference: -\$1,914,  $p=0.9784$

Hospitalisation, CD-related: \$6,164 (\$19,613) vs. \$8,111 (\$37,846), Difference: -\$1,947,  $p=0.9037$

ER visit: \$407 (\$1,396) vs. \$330 (\$869), Difference: \$78,  $p=0.4188$

ER visit, CD-related: \$242 (\$1,243) vs. \$178 (\$712), Difference: \$64,  $p=0.7489$

Outpatient / office visit: \$5,443 (\$8,998) vs. \$9,172 (\$11,676), Difference: -\$3,729,  $p<0.0001^*$

Outpatient / office visit,

CD-related: \$2,971  
 (\$5,335) vs. \$6,728  
 (\$10,020), Difference: -  
 \$3,757,  $p < 0.0001^*$   
 Other medical costs: \$556  
 (\$2,898) vs. \$1,153  
 (\$7,862), Difference: -  
 \$597,  $p = 0.2121$   
 Other medical costs, CD-  
 related: \$378 (\$2,841) vs.  
 \$549 (\$2,867), Difference:  
 -\$171,  $p = 0.0666$   
 Total medical service  
 costs: \$13,061 (\$24,800)  
 vs. \$19,224 (\$48,897),  
 Difference: -\$6,163,  
 $p < 0.0001^*$   
 Total medical service cost,  
 CD-related: \$9,755  
 (\$22,561) vs. \$15,566  
 (\$39,625), Difference: -  
 \$5,811,  $p < 0.0001^*$   
 Total healthcare costs,  
 Mean (SD)  
 Total healthcare costs:  
 \$34,202 (\$26,680) vs.  
 \$43,863 (\$74,009),  
 Difference: -\$9,662,  $p =$   
 0.0035\*  
 Total healthcare costs,  
 CD-related: \$29,078  
 (\$23,680) vs. \$37,701  
 (\$56,314), Difference: -  
 \$8,623,  $p = 0.0011^*$   
 Total healthcare costs  
 excluding index drug,  
 Mean (SD)  
 Total healthcare costs  
 \$15,871 (\$26,040) vs.  
 \$23,982 (\$52,935),  
 Difference: -\$8,111,  
 $p < 0.0001^*$   
 Total healthcare costs,

CD-related \$10,748  
(\$22,682) vs. \$17,820  
(\$39,822), Difference: -  
\$7,072, p<0.0001

|                                          |            |     |    |    |    |    |    |                                                                                                                                                                                                                                                                                                                                                                                                                                                                                                                                                                                                                                                                                                                                                                                                                                                                                                                                                                                                             |                                                                                                                                                                                                                                                                                                                                                                                                                                                                                                                                                                                                                                                                                                                                                           |
|------------------------------------------|------------|-----|----|----|----|----|----|-------------------------------------------------------------------------------------------------------------------------------------------------------------------------------------------------------------------------------------------------------------------------------------------------------------------------------------------------------------------------------------------------------------------------------------------------------------------------------------------------------------------------------------------------------------------------------------------------------------------------------------------------------------------------------------------------------------------------------------------------------------------------------------------------------------------------------------------------------------------------------------------------------------------------------------------------------------------------------------------------------------|-----------------------------------------------------------------------------------------------------------------------------------------------------------------------------------------------------------------------------------------------------------------------------------------------------------------------------------------------------------------------------------------------------------------------------------------------------------------------------------------------------------------------------------------------------------------------------------------------------------------------------------------------------------------------------------------------------------------------------------------------------------|
| COMPA<br>IRS<br>(Susman<br>2012)[9<br>8] | Infliximab | 623 | NR | NR | NR | NR | NR | Pre- vs. Post-Infliximab, Mean (SD)<br>Index drug costs: NA vs. \$12,401 (\$20,834)<br>Prescription drugs costs;<br>Total prescription drug cost: \$1,113 (\$1,936) vs. \$1,639 (\$6,341)<br>Total CD-related drug cost: \$585 (\$897) vs. \$857 (\$2,047)<br>Medical service-related costs;<br>Hospitalisation: \$4,405 (\$14,779) vs. \$5,166 (\$24,762)<br>Hospitalisation, CD-related: \$4,260 (\$14,677) vs. \$4,961 (\$24,638)<br>ER visit: \$242 (\$797) vs. \$278 (\$1,441)<br>ER visit, CD-related: \$165 (\$593) vs. \$182 (\$1,330)<br>Outpatient / office visit: \$4,892 (\$6,880) vs. \$4,565 (\$6,007)<br>Outpatient / office visit, CD-related: \$4,014 (\$6,294) vs. \$3,659 (\$5,364)<br>Other medical costs: \$315 (\$1,560) vs. \$307 (\$1,545)<br>Other medical costs, CD-related: \$248 (\$1,522) vs. \$257 (\$1,503)<br>Total medical service costs: \$9,854 (\$16,805) vs. \$10,316 (\$25,995)<br>Total medical service costs, CD-related: \$8,686 (\$16,307) vs. \$9,059 (\$25,597) | Pre- vs. Post-Infliximab, Mean (SD)<br>Hospitalisation;<br>6-Month rate, any cause, n (%): 138 (22) vs. 102 (16)<br>6-Month rate, CD-related, n (%): 135 (22) vs. 94 (15)<br>Hospitalisation days, any cause: 2.08 (7.6) vs. 1.78 (5.9)<br>Hospitalisation days, CD-related: 2.04 (7.6) vs. 1.71 (5.9)<br>Number of hospital visits, any cause: 0.33 (0.7) vs. 0.25 (0.7)<br>Number of hospital visits, CD-related: 0.32 (0.7) vs. 0.23 (0.6)<br>Emergency room visit;<br>6-Month rate, any cause, n (%): 143 (23) vs. 120 (19)<br>6-Month rate, CD-related, n (%): 102 (16) vs. 62 (10)<br>Outpatient visits;<br>Number of outpatient visits, any cause: 9.66 (7.7) vs. 11.3 (7.3)<br>Number of outpatient visits, CD-related: 5.48 (3.7) vs. 7.22 (3.9) |
|                                          |            |     |    |    |    |    |    | Pre- vs. Post-Infliximab, Mean (SD)<br>Total healthcare costs;<br>Total healthcare costs: \$10,967 (\$17,019) vs. \$24,355 (\$36,525)<br>Total healthcare costs, CD-related: \$9,271 (\$16,323) vs. \$22,316 (\$32,578)<br>Post-Index Total healthcare costs excluding index drug, Mean (SD);<br>Total healthcare costs \$11,955 (\$27,032)<br>Total healthcare costs, CD-related \$9,916 (\$25,672)                                                                                                                                                                                                                                                                                                                                                                                                                                                                                                                                                                                                        |                                                                                                                                                                                                                                                                                                                                                                                                                                                                                                                                                                                                                                                                                                                                                           |

|                                     |            |      |    |    |    |    |    |                                                                                         |
|-------------------------------------|------------|------|----|----|----|----|----|-----------------------------------------------------------------------------------------|
| TREAT<br>registry<br>(Lichtenstein) | Infliximab | 3420 | NR | NR | NR | NR | NR | Health resource utilisation in year before enrolment:<br>Surgical admission: 596 (17.4) |
|-------------------------------------|------------|------|----|----|----|----|----|-----------------------------------------------------------------------------------------|

2012)[8  
1]

|                                               |                       |      |    |    |    |    |                                                                                         |
|-----------------------------------------------|-----------------------|------|----|----|----|----|-----------------------------------------------------------------------------------------|
| <b>TREAT registry (Lichtenstein 2012)[81]</b> | Other treatments only | 2853 | NR | NR | NR | NR | Health resource utilisation in year before enrolment:<br>Surgical admission: 387 (13.6) |
|-----------------------------------------------|-----------------------|------|----|----|----|----|-----------------------------------------------------------------------------------------|

Pre-index utilization of Crohn's disease-related healthcare services and inpatient costs:  
Outpatient services  
Emergency room visits  
Patients with ≥1 claim, n (%):  
33 (19)  
Claims  
Mean (SD): 1.42 (0.87)  
Median: 1

Laboratory and pathology  
Patients with ≥1 claim, n (%):  
137 (80)  
Claims  
Mean (SD): 11.30 (11.74)  
Median: 7

Radiology  
Patients with ≥1 claim, n (%):  
73 (42)  
Claims  
Mean (SD): 2.38 (1.72)  
Median 2:

Physician office visits  
Patients with ≥1 claim, n (%):  
153 (89)  
Claims  
Mean (SD): 4.56 (3.28)  
Median 4:

Surgical services  
Patients with ≥1 claim, n (%):

**Carter 2011[94]**

Non-adherent (4-6 infusions)

172

PRE-INDEX :  
Hospitalisation costs among those hospitalised, \$:  
Mean (SD): 20,515 (46,732)  
Median: 11,476  
POST-INDEX :  
Hospitalisation costs, \$:  
Mean (SD): 37,783 (44,986)  
Median: 28,864

NR

NR

70 (41)  
Claims  
Mean (SD): 1.36 (0.87)  
Median: 1

Ancillary/all other outpatient  
services  
Patients with  $\geq 1$  claim, n (%):  
134 (78)  
Claims  
Mean (SD): 8.32 (9.83)  
Median: 5

Inpatient hospitalisations  
Patients with  $\geq 1$   
hospitalisation, n (%): 34 (20)

Hospital days among those  
hospitalised  
Mean (SD): 9.35 (15.09)  
Median: 6

POST-INDEX UTILIZATION OF  
CROHN'S DISEASE-RELATED  
HEALTHCARE SERVICES

Pharmacy services  
Immunomodulators  
Patients with  $\geq 1$  claim, n (%):  
74 (43)  
Claims  
Mean (SD): 5.72 (3.68)  
Median: 5

5-ASA  
Patients with  $\geq 1$  claim, n (%):  
59 (34)  
Claims  
Mean (SD): 3.98 (2.74)  
Median: 3

Corticosteroids  
Patients with  $\geq 1$  claim, n (%):  
70 (41)

Claims  
Mean (SD): 4.04 (3.39)  
Median 3

Outpatient services  
Emergency room visits  
Patients with  $\geq 1$  claim, n (%):  
30 (17)  
Claims  
Mean (SD): 1.33 (0.76)  
Median: 1

Laboratory and pathology  
Patients with  $\geq 1$  claim, n (%):  
132 (77)  
Claims  
Mean (SD): 15.17 (17.26)  
Median 11

Radiology  
Patients with  $\geq 1$  claim, n (%):  
52 (30)  
Claims  
Mean (SD): 3.00 (2.33)  
Median: 2

Physician office visits  
Patients with  $\geq 1$  claim, n (%):  
158 (92)  
Claims  
Mean (SD): 5.96 (5.19)  
Median: 5

Surgical services  
Patients with  $\geq 1$  claim, n (%):  
46 (27)  
Claims  
Mean (SD): 1.80 (1.11)  
Median: 2

Ancillary/all other outpatient  
services  
Patients with  $\geq 1$  claim, n (%):

|                                 |                                |     |  |    |    |                                                                                                                                                                                                                                                                                                                                                                      |
|---------------------------------|--------------------------------|-----|--|----|----|----------------------------------------------------------------------------------------------------------------------------------------------------------------------------------------------------------------------------------------------------------------------------------------------------------------------------------------------------------------------|
|                                 |                                |     |  |    |    | 166 (97)<br>Claims<br>Mean (SD): 19.54 (12.53)<br>Median: 18                                                                                                                                                                                                                                                                                                         |
|                                 |                                |     |  |    |    | POST-INDEX CROHN'S<br>DISEASE-RELATED<br>HOSPITALISATIONS, LENGTH<br>OF STAY, AND INPATIENT<br>COSTS AMONG CROHN'S<br>DISEASE PATIENTS WITH A<br>HOSPITALISATION<br>Proportion of all patients<br>with a hospitalisation, %: 12<br>Number of hospitalisations<br>Mean (SD): 1.4 (0.6)<br>Median: 1<br>Number of hospital days<br>Mean (SD): 12.8 (13.0)<br>Median: 8 |
|                                 |                                |     |  |    |    | PRE-INDEX UTILISATION OF<br>CROHN'S DISEASE-RELATED<br>HEALTHCARE SERVICES AND<br>INPATIENT COSTS<br><u>Outpatient services</u><br>Emergency room visits<br>Patients with ≥1 claim, n (%):<br>60 (13) ( <i>p</i> = 0.05)<br>Claims<br>Mean (SD): 1.50 (0.98)<br>Median: 1 ( <i>p</i> = 0.77)                                                                         |
| <b>Carter<br/>2011[9<br/>4]</b> | Adherent<br>(7-9<br>infusions) | 466 |  |    |    |                                                                                                                                                                                                                                                                                                                                                                      |
|                                 |                                |     |  |    |    | PRE-INDEX :<br>Hospitalisation costs among<br>those hospitalised, \$:<br>Mean (SD): 17,270 (18,825)<br>Median: 10,199 ( <i>p</i> = 0.74)<br>POST-INDEX :<br>Hospitalisation costs, \$:<br>Mean (SD): 13,427 (11,085)<br>Median: 9,352 ( <i>p</i> value: 0.001)                                                                                                       |
|                                 |                                |     |  | NR | NR | Laboratory and pathology<br>Patients with ≥1 claim, n (%):<br>373 (80) ( <i>p</i> = 0.91)<br>Claims<br>Mean (SD): 11.99 (13.59)<br>Median: 8 ( <i>p</i> value: 0.63)                                                                                                                                                                                                 |
|                                 |                                |     |  |    |    | Radiology<br>Patients with ≥1 claim, n (%):<br>229 (49) ( <i>p</i> = 0.13)<br>Claims                                                                                                                                                                                                                                                                                 |

Mean (SD): 2.42 (1.78)  
Median: 2 ( $p= 0.92$ )

Physician office visits  
Patients with  $\geq 1$  claim, n (%):  
418 (90) ( $p= 0.79$ )  
Claims  
Mean (SD): 4.70 (3.47)  
Median: 4 ( $p= 0.81$ )

Surgical services ( $P= 0.52$ )  
Patients with  $\geq 1$  claim, n (%):  
203 (44)  
Claims  
Mean (SD): 1.50 (0.98)  
Median: 1 ( $p= 0.19$ )

Ancillary/all other outpatient  
services  
Patients with  $\geq 1$  claim, n (%):  
361 (78)  $p= 0.91$   
Claims  
Mean (SD): 7.41 (8.05)  
Median: 5 ( $p$  value: 0.67)

Inpatient hospitalisations  
Patients with  $\geq 1$   
hospitalisation, n (%): 91 (20)  
( $p= 0.95$ )

Hospital days among those  
hospitalised  
Mean (SD): 8.13 (8.14)  
Median: 6 ( $p= 0.64$ )

POST-INDEX UTILIZATION OF  
CROHN'S DISEASE-RELATED  
HEALTHCARE SERVICES  
Pharmacy services  
Immunomodulators  
Patients with  $\geq 1$  claim, n (%):  
217 (47) ( $p= 0.43$ )  
Claims



Mean (SD): 6.61 (3.87)  
Median: 6 ( $p= 0.09$ )

5-ASA  
Patients with  $\geq 1$  claim, n (%):  
174 (37) ( $p= 0.48$ )  
Claims  
Mean (SD): 5.13 (3.57)  
Median: 4 ( $p= 0.05$ )

Corticosteroids  
Patients with  $\geq 1$  claim, n (%):  
189 (41) ( $p= 0.98$ )  
Claims  
Mean (SD): 3.02 (2.69)  
Median: 2 ( $p= 0.02$ )

Outpatient services  
Emergency room visits  
Patients with  $\geq 1$  claim, n (%):  
51 (11) ( $p= 0.03$ )  
Claims  
Mean (SD): 1.65 (1.07)  
Median: 1 ( $p= 0.12$ )

Laboratory and pathology  
Patients with  $\geq 1$  claim, n (%):  
366 (79) ( $p= 0.63$ )  
Claims  
Mean (SD): 13.96 (18.02)  
Median: 9 ( $p= 0.32$ )

Radiology  
Patients with  $\geq 1$  claim, n (%):  
123 (26) ( $p= 0.34$ )  
Claims  
Mean (SD): 2.20 (1.71)  
Median: 2 ( $p= 0.04$ )

Physician office visits  
Patients with  $\geq 1$  claim, n (%):  
419 (90) ( $p= 0.46$ )  
Claims

|  |  |  |  |  |  |  |                                                                                                                                                                                                                                                                                                                                                                                        |
|--|--|--|--|--|--|--|----------------------------------------------------------------------------------------------------------------------------------------------------------------------------------------------------------------------------------------------------------------------------------------------------------------------------------------------------------------------------------------|
|  |  |  |  |  |  |  | Mean (SD): 6.03 (4.52)<br>Median: 5 ( $p= 0.79$ )                                                                                                                                                                                                                                                                                                                                      |
|  |  |  |  |  |  |  | Surgical services<br>Patients with $\geq 1$ claim, n (%):<br>129 (28) ( $p= 0.81$ )<br>Claims<br>Mean (SD): 2.01 (1.95)<br>Median: 1 ( $p= 0.41$ )                                                                                                                                                                                                                                     |
|  |  |  |  |  |  |  | Ancillary/all other outpatient services<br>Patients with $\geq 1$ claim, n (%):<br>451 (97) ( $p= 0.87$ )<br>Claims<br>Mean (SD): 23.93 (13.04)<br>Median: 21 ( $p < 0.001$ )                                                                                                                                                                                                          |
|  |  |  |  |  |  |  | POST-INDEX CROHN'S DISEASE-RELATED HOSPITALISATIONS, LENGTH OF STAY, AND INPATIENT COSTS AMONG CROHN'S DISEASE PATIENTS WITH A HOSPITALISATION<br>Proportion of all patients with a hospitalisation, %: 8 ( $p= 0.12$ )<br>Number of hospitalisations<br>Mean (SD): 1.2 (0.5)<br>Median: 1 ( $p= 0.13$ )<br>Number of hospital days<br>Mean (SD): 5.9 (3.5)<br>Median: 5 ( $p= 0.02$ ) |

Leombr  
uno  
2011[5  
5]

Inflixima  
b users

338

NR

NR

NR

No. of patients hospitalised at least once over the follow-up period: 115 (34)  
No. of patients CD-related hospital admission during the follow-up period of 671 patient years: 61 (18.0)  
Hospital admissions in which

|                                 |                                             |            |                                                                                                                                                                                                                                                                                                                                                                                                                                                                                                                                                 |           |                                                                                                            |                                                                                                                                                                                                                                                                                                                                                                                                                                                                                                                                                                                                                                                |
|---------------------------------|---------------------------------------------|------------|-------------------------------------------------------------------------------------------------------------------------------------------------------------------------------------------------------------------------------------------------------------------------------------------------------------------------------------------------------------------------------------------------------------------------------------------------------------------------------------------------------------------------------------------------|-----------|------------------------------------------------------------------------------------------------------------|------------------------------------------------------------------------------------------------------------------------------------------------------------------------------------------------------------------------------------------------------------------------------------------------------------------------------------------------------------------------------------------------------------------------------------------------------------------------------------------------------------------------------------------------------------------------------------------------------------------------------------------------|
| <p><b>Leombruno 2011[5]</b></p> | <p>Infliximab non-users</p>                 | <p>670</p> | <p>NR</p>                                                                                                                                                                                                                                                                                                                                                                                                                                                                                                                                       | <p>NR</p> | <p>NR</p>                                                                                                  | <p>infection was listed as a primary or secondary diagnosis: 39 (11.5), experienced a total of 61 admissions.<br/> Total hospitalised days during the follow-up period of 671 patient years: 1888<br/> No. of patients hospitalised at least once over the follow-up period: 273 (670)<br/> No. of patients CD-related hospital admission during the follow-up period of 1303 patient years: 133 (19.8)<br/> Hospital admissions in which infection was listed as a primary or secondary diagnosis: 84 (12.5), experienced a total of 147 admissions.<br/> Total hospitalised days during the follow-up period of 1303 patient years: 5279</p> |
| <p><b>Loomes 2011[9]</b></p>    | <p>One year before and after Infliximab</p> | <p>66</p>  | <p>Stratified costs:<br/> Health care visit<br/> Inpatient:<br/> Pre- vs. Post-Infliximab<br/> Hospitalisation: \$2715 vs. 968, <math>p &lt; 0.05</math><br/> Outpatient:<br/> Pre- vs. Post-Infliximab<br/> Emergency room visit: \$191 vs. 107, <math>p = 0.12</math><br/> Pre- vs. Post-Infliximab<br/> Outpatient visit: \$285 vs. \$478, <math>p &lt; 0.05</math><br/> Endoscopy<br/> Outpatient:<br/> Pre- vs. Post-Infliximab<br/> Esophagogastroduodenoscopy:<br/> \$6 vs. \$0, <math>p = 0.32</math><br/> Pre- vs. Post-Infliximab</p> | <p>NR</p> | <p>Total direct cost;<br/> Pre- vs. Post-Infliximab:<br/> \$3930 vs. \$25346, <math>p &lt; 0.05</math></p> | <p>Health care visit<br/> Inpatient;<br/> Pre- vs. Post-Infliximab<br/> Hospitalisation: 47 vs. 25, <math>p = 0.06</math><br/> Pre- vs. Post-Infliximab<br/> Hospital day: 495 vs. 155, <math>p &lt; 0.05</math><br/> Outpatient;<br/> Pre- vs. Post-Infliximab<br/> Emergency room visit: 52 vs. 29, <math>p = 0.12</math><br/> Pre- vs. Post-Infliximab<br/> Outpatient visit: 182 vs. 205, <math>p &lt; 0.05</math><br/> Endoscopy<br/> Inpatient;<br/> Pre- vs. Post-Infliximab<br/> Esophagogastroduodenoscopy</p>                                                                                                                        |

Colonoscopy: \$426 vs. \$242,  $p < 0.05$   
 Radiology  
 Outpatient:  
 Pre- vs. Post-Infliximab  
 Computed tomography scan:  
 \$114 vs. \$75,  $p = 0.32$   
 Pre- vs. Post-Infliximab Magnetic  
 resonance imaging: \$38 vs. \$53,  
 $p = 0.58$   
 Pre- vs. Post-Infliximab Other x-  
 ray: \$10 vs. \$8,  $p = 0.78$   
 Therapeutic intervention  
 Inpatient:  
 Pre- vs. Post-Infliximab  
 Nonsurgical management: \$926  
 vs. \$380,  $p = 0.05$   
 Pre- vs. Post-Infliximab Minor  
 surgery: \$113 vs. 217,  $p = 0.57$   
 Pre- vs. Post-Infliximab Major  
 surgery: \$1504 vs. \$263,  $p < 0.05$   
 Outpatient:  
 Pre- vs. Post-Infliximab Day  
 surgery: \$110 vs. \$62,  $p = 0.36$   
 Pre- vs. Post-Infliximab  
 Transfusion: \$36 vs. \$26,  $p = 0.71$

y: 18 vs. 20,  $p = 0.78$   
 Pre- vs. Post-Infliximab  
 Colonoscopy: 46 vs. 24,  $p < 0.05$   
 Outpatient;  
 Pre- vs. Post-Infliximab  
 Esophagogastroduodenoscop  
 y: 1 vs. 0,  $p = 0.32$   
 Pre- vs. Post-Infliximab  
 Colonoscopy: 58 vs. 33,  $p < 0.05$   
 Radiology  
 Inpatient;  
 Pre- vs. Post-Infliximab  
 Computed tomography scan:  
 19 vs. 10,  $p = 0.29$   
 Pre- vs. Post-Infliximab  
 Magnetic resonance imaging:  
 0 vs. 1,  $p = 0.32$   
 Pre- vs. Post-Infliximab Other  
 x-ray: 24 vs. 13,  $p = 0.29$   
 Outpatient;  
 Pre- vs. Post-Infliximab  
 Computed tomography scan:  
 16 vs. 11,  $p = 0.36$   
 Pre- vs. Post-Infliximab  
 Magnetic resonance imaging:  
 5 vs. 7,  $p = 0.58$   
 Pre- vs. Post-Infliximab Other  
 x-ray: 5 vs. 4,  $p = 0.78$   
 Therapeutic intervention  
 Inpatient;  
 Pre- vs. Post-Infliximab  
 Nonsurgical management: 22  
 vs. 11,  $p = 0.10$   
 Pre- vs. Post-Infliximab Minor  
 surgery: 3 vs. 3,  $p = 1.00$   
 Pre- vs. Post-Infliximab Major  
 surgery: 10 vs. 2,  $p < 0.05$   
 Outpatient;  
 Pre- vs. Post-Infliximab Day  
 surgery: 12 vs. 5,  $p = 0.11$   
 Pre- vs. Post-Infliximab

|                        |                                                          |    |                                                                                                                                                                                                                                                                                                                                                                                                                                                                                                                                                                                                                                                                                                                                                                                                                                                                                                                                                                                                                                                                                                                                                                                                                                             |    |                                                                                 |                                |                                                                                                                                                                                                                                                                                                                                                                                                                                                                                                                                                                                                                                                                                                                                                                                                                                                                                                                                                                                                                                                                                                                                                |
|------------------------|----------------------------------------------------------|----|---------------------------------------------------------------------------------------------------------------------------------------------------------------------------------------------------------------------------------------------------------------------------------------------------------------------------------------------------------------------------------------------------------------------------------------------------------------------------------------------------------------------------------------------------------------------------------------------------------------------------------------------------------------------------------------------------------------------------------------------------------------------------------------------------------------------------------------------------------------------------------------------------------------------------------------------------------------------------------------------------------------------------------------------------------------------------------------------------------------------------------------------------------------------------------------------------------------------------------------------|----|---------------------------------------------------------------------------------|--------------------------------|------------------------------------------------------------------------------------------------------------------------------------------------------------------------------------------------------------------------------------------------------------------------------------------------------------------------------------------------------------------------------------------------------------------------------------------------------------------------------------------------------------------------------------------------------------------------------------------------------------------------------------------------------------------------------------------------------------------------------------------------------------------------------------------------------------------------------------------------------------------------------------------------------------------------------------------------------------------------------------------------------------------------------------------------------------------------------------------------------------------------------------------------|
| Loomes<br>2011[9<br>5] | Two<br>years<br>before<br>and<br>after<br>Inflixima<br>b | 39 | <p>Stratified costs:<br/>Health care visit<br/>Inpatient:<br/>Pre- vs. Post-Infliximab<br/>Hospitalisation: \$2881 vs. \$1037,<br/><math>p=0.06</math><br/>Outpatient:<br/>Pre- vs. Post-Infliximab<br/>Emergency room visit: \$118 vs.<br/>\$131, <math>p=0.79</math><br/>Pre- vs. Post-Infliximab<br/>Outpatient visit: \$264 vs. \$497,<br/><math>p&lt;0.05</math><br/>Endoscopy<br/>Outpatient:<br/>Pre- vs. Post-Infliximab<br/>Esophagogastroduodenoscopy:<br/>\$0 vs. \$0<br/>Pre- vs. Post-Infliximab<br/>Colonoscopy: \$423 vs. \$255, <math>p&lt;0.16</math><br/>Radiology<br/>Outpatient:<br/>Pre- vs. Post-Infliximab<br/>Computed tomography scan: \$99<br/>vs. \$72, <math>p=0.47</math><br/>Pre- vs. Post-Infliximab Magnetic<br/>resonance imaging: \$45 vs. \$32,<br/><math>p=0.59</math><br/>Pre- vs. Post-Infliximab Other x-<br/>ray: \$14 vs. \$7, <math>p=0.42</math><br/>Therapeutic intervention<br/>Inpatient:<br/>Pre- vs. Post-Infliximab<br/>Nonsurgical management: \$728<br/>vs. \$375, <math>p=0.22</math><br/>Pre- vs. Post-Infliximab Minor<br/>surgery: \$160 vs. \$184, <math>p=0.89</math><br/>Pre- vs. Post-Infliximab Major<br/>surgery: \$1895 vs. \$351, <math>p&lt;0.05</math><br/>Outpatient:</p> | NR | Total direct cost;<br>Pre- vs. Post-Infliximab:<br>\$3981 vs. \$20098, $p=0.08$ | Transfusion: 7 vs. 5, $p=0.71$ | <p>Health care visit<br/>Inpatient;<br/>Pre- vs. Post-Infliximab<br/>Hospitalisation: 26 vs. 14.5,<br/><math>p=0.14</math><br/>Pre- vs. Post-Infliximab<br/>Hospital day: 346 vs. 160, <math>p=0.10</math><br/>Outpatient;<br/>Pre- vs. Post-Infliximab<br/>Emergency room visit: 38 vs.<br/>42, <math>p=0.79</math><br/>Pre- vs. Post-Infliximab<br/>Outpatient visit: 199 vs. 275,<br/><math>p&lt;0.05</math><br/>Endoscopy<br/>Inpatient;<br/>Pre- vs. Post-Infliximab<br/>Esophagogastroduodenoscopy:<br/>17 vs. 21, <math>p=0.60</math><br/>Pre- vs. Post-Infliximab<br/>Colonoscopy: 26 vs. 41, <math>p=0.34</math><br/>Outpatient;<br/>Pre- vs. Post-Infliximab<br/>Esophagogastroduodenoscopy:<br/>0 vs. 0, <math>p=NA</math><br/>Pre- vs. Post-Infliximab<br/>Colonoscopy: 68 vs. 41, <math>p&lt;0.16</math><br/>Radiology<br/>Inpatient;<br/>Pre- vs. Post-Infliximab<br/>Computed tomography scan:<br/>9 vs. 12, <math>p=0.62</math><br/>Pre- vs. Post-Infliximab<br/>Magnetic resonance imaging:<br/>3 vs. 1, <math>p=0.53</math><br/>Pre- vs. Post-Infliximab Other<br/>x-ray: 20 vs. 19, <math>p=0.94</math><br/>Outpatient;</p> |
|------------------------|----------------------------------------------------------|----|---------------------------------------------------------------------------------------------------------------------------------------------------------------------------------------------------------------------------------------------------------------------------------------------------------------------------------------------------------------------------------------------------------------------------------------------------------------------------------------------------------------------------------------------------------------------------------------------------------------------------------------------------------------------------------------------------------------------------------------------------------------------------------------------------------------------------------------------------------------------------------------------------------------------------------------------------------------------------------------------------------------------------------------------------------------------------------------------------------------------------------------------------------------------------------------------------------------------------------------------|----|---------------------------------------------------------------------------------|--------------------------------|------------------------------------------------------------------------------------------------------------------------------------------------------------------------------------------------------------------------------------------------------------------------------------------------------------------------------------------------------------------------------------------------------------------------------------------------------------------------------------------------------------------------------------------------------------------------------------------------------------------------------------------------------------------------------------------------------------------------------------------------------------------------------------------------------------------------------------------------------------------------------------------------------------------------------------------------------------------------------------------------------------------------------------------------------------------------------------------------------------------------------------------------|

Pre- vs. Post-Infliximab Day surgery: \$108 vs. \$86,  $p= 0.67$   
 Pre- vs. Post-Infliximab Transfusion: \$30 vs. \$13,  $p= 0.59$

Pre- vs. Post-Infliximab Computed tomography scan: 16 vs. 12,  $p= 0.5$   
 Pre- vs. Post-Infliximab Magnetic resonance imaging: 7 vs. 5,  $p= 0.6$   
 Pre- vs. Post-Infliximab Other x-ray: 8 vs. 4,  $p= 0.42$   
 Therapeutic intervention Inpatient;  
 Pre- vs. Post-Infliximab Nonsurgical management: 19 vs. 13,  $p= 0.45$   
 Pre- vs. Post-Infliximab Minor surgery: 6 vs.3,  $p= 0.49$   
 Pre- vs. Post-Infliximab Major surgery: 12 vs. 3,  $p< 0.05$   
 Outpatient;  
 Pre- vs. Post-Infliximab Day surgery: 16 vs. 9,  $p= 0.2$   
 Pre- vs. Post-Infliximab Transfusion: 7 vs. 3,  $p= 0.59$

Mean physician visits (compared in all 6-month time slots)  
 Physician visits with an associated diagnosis of IBD were consistently more common in Infliximab than Azathioprine than in Steroids. All 6-month periods showed significant differences among the three cohorts for IBD-associated physician visits ( $p< 0.001$ ).

Frequency of hospital admissions  
 Up until 6 months before their first prescription, with the exception of the 30 – 36-month time slot ( $p= 0.052$ ), the three drug cohorts showed significant

**Nugent 2010[58]**

Infliximab

126

NR

NR

NR

differences in the frequency of hospital admissions. The general pattern was Infiximab> Azathioprine> Steroids

The groups then differed significantly until 18 months after the first prescription ( $p$  values < 0.001 for 0 – 6 months, < 0.001 for 6 – 12 months, and 0.026 for 12 – 18 months).

**Overnights**  
The first 12 – 18 months before the initial prescriptions and the 18 months after showed significant variation in overnights in hospital among the three drug cohorts ( $p$  values  $\leq 0.02$ ), with the Infiximab group having the greatest mean number of overnights in hospital throughout the 5 years before the initial prescription of Infiximab.

All-cause hospitalisation  
Total number of hospitalised patients during ADHERE: 17/261 (6.5)  
Patients with new hospitalisations: 11/261 (4.2)  
2-year overall number of patients hospitalised: 80/261 (30.6)

CD-related hospitalisation  
Total number of hospitalised patients during ADHERE: 10/261 (3.8)

**ADHERE  
E  
(Panaccione  
2010)[59]**

Placebo

261 (139 entered ADHERE)

NR

NR

NR

|                                                   |                      |                                 |    |    |    |                                                                                                                                                                                                                      |
|---------------------------------------------------|----------------------|---------------------------------|----|----|----|----------------------------------------------------------------------------------------------------------------------------------------------------------------------------------------------------------------------|
| <b>ADHERE<br/>E<br/>(Panaccione<br/>2010)[59]</b> | Adalimumab<br>eow    | 260 (144<br>entered<br>ADHERE)  | NR | NR | NR | Patients with new hospitalisations: 9/261 (3.4)<br>2-year overall number of patients hospitalised: 55/261 (21)                                                                                                       |
|                                                   |                      |                                 |    |    |    | All-cause hospitalisation<br>Total number of hospitalised patients during ADHERE: 23/260 (8.8)<br>Patients with new hospitalisations: 18/260 (6.9)<br>2-year overall number of patients hospitalised: 60/260 (23)    |
|                                                   |                      |                                 |    |    |    | CD-related hospitalisation<br>Total number of hospitalised patients during ADHERE: 15/260 (5.7)<br>Patients with new hospitalisations: 12/260 (4.6)<br>2-year overall number of patients hospitalised: 45/260 (17.3) |
| <b>ADHERE<br/>E<br/>(Panaccione<br/>2010)[59]</b> | Adalimumab<br>weekly | 257 ( 184<br>entered<br>ADHERE) | NR | NR | NR | All-cause hospitalisation<br>Total number of hospitalised patients during ADHERE: 33/257 (12.8)<br>Patients with new hospitalisations: 25/257 (9.7)<br>2-year overall number of patients hospitalised: 69/257 (26.8) |
|                                                   |                      |                                 |    |    |    | CD-related hospitalisation<br>Total number of hospitalised patients during ADHERE: 16/257 (6.2)<br>Patients with new hospitalisations: 12/257 (4.6)<br>2-year overall number of patients hospitalised: 41/257 (16)   |



|                         |            |     |    |    |                                                                                                                                                                                                                                                                                                                                                                                                                                                                                                                                                                                                                                                                                                                                                                                                                                                                                                                                                                                                                                                                                                                              |                                                                                                                                                                                                           |                                                                                                                                                                                                                                                                                                                                                                                                                                                                                                                                                                                                                                                                                                                                                                                                                                                                                                                                       |
|-------------------------|------------|-----|----|----|------------------------------------------------------------------------------------------------------------------------------------------------------------------------------------------------------------------------------------------------------------------------------------------------------------------------------------------------------------------------------------------------------------------------------------------------------------------------------------------------------------------------------------------------------------------------------------------------------------------------------------------------------------------------------------------------------------------------------------------------------------------------------------------------------------------------------------------------------------------------------------------------------------------------------------------------------------------------------------------------------------------------------------------------------------------------------------------------------------------------------|-----------------------------------------------------------------------------------------------------------------------------------------------------------------------------------------------------------|---------------------------------------------------------------------------------------------------------------------------------------------------------------------------------------------------------------------------------------------------------------------------------------------------------------------------------------------------------------------------------------------------------------------------------------------------------------------------------------------------------------------------------------------------------------------------------------------------------------------------------------------------------------------------------------------------------------------------------------------------------------------------------------------------------------------------------------------------------------------------------------------------------------------------------------|
| Sprakes<br>2010[6<br>1] | Infliximab | 100 | NR | NR | <p>Total Crohn's disease (CD)-related costs in 100 CD patients 12 months pre- and post-infliximab:</p> <p>Mean cost per person preinfliximab; Mean cost per person post-infliximab; Mean cost-saving per person post-infliximab; 95% CI; P-value</p> <p>Medication costs: £598.71; £448.45; £150.26; £54.59 to £245.93; 0.002</p> <p>Radiology costs: £315.79; £89.46; £226.33; £170.48 to £282.18; &lt;0.001</p> <p>Endoscopy costs: £397.64; £77.86; £319.78; £227.26 to £412.30; &lt;0.001</p> <p>Surgery costs: £536.88; £124.06; £412.82; £116.00 to £709.64; 0.007</p> <p>Outpatient visit costs: £479.30; £372.67; £106.63; £53.78 to £159.48; &lt;0.001</p> <p>Blood test costs: £48.52; £37.13; £11.39; £2.77 to £20.01; 0.01</p> <p>Inpatient admission costs: £2588.36; £670.90; £1917.46; £1219.63 to £2615.29; &lt;0.001</p> <p>Day case infusion costs: £0; £393.86; -£393.86; -£453.18 to -£334.54; &lt;0.001</p> <p>Total costs: £4965.20; £2214.37; £2750.83; £1856.91 to £3660.93; &lt;0.001</p> <p>Mean costs at 12 months post-infliximab in responders were lower than in non-responders (£1656 vs.</p> | <p>Number of acute medical admissions</p> <p>Pre-infliximab: 56</p> <p>Post-infliximab: 14</p> <p>Mean length of stay per medical admission (days)</p> <p>Pre-infliximab: 5</p> <p>Post-infliximab: 9</p> | <p>No statistically significant difference in costs post-infliximab was detected between the scheduled and episodic groups (£3339 vs. £2906, <math>p=0.44</math>).</p> <p>There were a total of 518 (357 + 161) infliximab infusions administered to 100 patients during the 12 months of the study (mean: 5.2 infusions per patient).</p> <p>A total of 357 infusions were given to the scheduled group (mean: 6.3 infusions) compared with 161 (mean: 3.7) in the episodic group (<math>p &lt; 0.001</math>). The mean difference in costs of infliximab in the two groups of patients was statistically significant (£10 940 in scheduled vs. £6514 in episodic, <math>p &lt; 0.001</math>).</p> <p>There were a total of 377 diagnostic tests performed in the 100 included patients in the year prior to infliximab therapy compared with 75 in the year following commencement of infliximab.</p> <p>All 100 patients had a</p> |
|-------------------------|------------|-----|----|----|------------------------------------------------------------------------------------------------------------------------------------------------------------------------------------------------------------------------------------------------------------------------------------------------------------------------------------------------------------------------------------------------------------------------------------------------------------------------------------------------------------------------------------------------------------------------------------------------------------------------------------------------------------------------------------------------------------------------------------------------------------------------------------------------------------------------------------------------------------------------------------------------------------------------------------------------------------------------------------------------------------------------------------------------------------------------------------------------------------------------------|-----------------------------------------------------------------------------------------------------------------------------------------------------------------------------------------------------------|---------------------------------------------------------------------------------------------------------------------------------------------------------------------------------------------------------------------------------------------------------------------------------------------------------------------------------------------------------------------------------------------------------------------------------------------------------------------------------------------------------------------------------------------------------------------------------------------------------------------------------------------------------------------------------------------------------------------------------------------------------------------------------------------------------------------------------------------------------------------------------------------------------------------------------------|

£3608,  $p=0.02$ )

chest X-ray (CXR) prior to commencement of infliximab, to exclude tuberculosis, and 67 plain X-rays were requested for other CD-related indications

|                 |            |                                       |                                                                                                                                                                                                                                                                                                                                   |    |                                                                                                                                                                                 |                                                                                                                                                                                                                                                                                                                                                                                                                                                                                                        |                                                                                                                                                                                                                                                           |
|-----------------|------------|---------------------------------------|-----------------------------------------------------------------------------------------------------------------------------------------------------------------------------------------------------------------------------------------------------------------------------------------------------------------------------------|----|---------------------------------------------------------------------------------------------------------------------------------------------------------------------------------|--------------------------------------------------------------------------------------------------------------------------------------------------------------------------------------------------------------------------------------------------------------------------------------------------------------------------------------------------------------------------------------------------------------------------------------------------------------------------------------------------------|-----------------------------------------------------------------------------------------------------------------------------------------------------------------------------------------------------------------------------------------------------------|
| Stein 2010[62]  | Infliximab | Prior Irregular (PI) Exposure, n = 40 | <p>The excess costs per patient in the PI group (compared to the SM group)</p> <p>Excess Infusion-related costs attributed to the need for infliximab dose intensification in the PI group during the third year of treatment: \$6,838</p> <p>Excess Surgical cost: \$3,740</p> <p>Excess Medical hospitalisation cost: \$886</p> | NR | <p>Total excess cost in the PI exposure cohort during the third year of infliximab maintenance therapy per patient, in spite of both cohorts being on SM therapy: \$11,464.</p> | <p>Rate of hospitalisation: 47.5%</p> <p>First year: 20%</p> <p>Second year: 20%</p> <p>Third year: 7.5%</p>                                                                                                                                                                                                                                                                                                                                                                                           | <p>Difference in costs due to prior irregular exposure during the third year of infliximab treatment, when all patients in both groups were receiving regular maintenance therapy (i.e., infusion intervals of every 8 weeks or less) was calculated.</p> |
| Stein 2010[62]  | Infliximab | Schedule d Maintenance (SM), n = 64   |                                                                                                                                                                                                                                                                                                                                   |    |                                                                                                                                                                                 | <p>Rate of hospitalisation: 26.5%, <math>p=0.03</math></p> <p>First year: 9.3%</p> <p>Second year: 10.9%</p> <p>Third year: 3.1%</p>                                                                                                                                                                                                                                                                                                                                                                   |                                                                                                                                                                                                                                                           |
| Taxone 2009[64] | Infliximab | Luminal CD: 84                        | NR                                                                                                                                                                                                                                                                                                                                | NR | NR                                                                                                                                                                              | <p><u>Pre-IFX</u></p> <p>Hospital admission (%): 48.8</p> <p>Hospital stay (d/y) (range): 11.23 (7.1-15.3)</p> <p>Surgery (%): 11.9</p> <p>Surgery (interventions/y) (range): 0.13 (0.0-0.2)</p> <p>-Perianal surgery: 0.09</p> <p>-Resections: 0.02</p> <p>-Ostomy: 0.00</p> <p>-Other surgery: 0.01</p> <p>Clinical consultations (per year): 8.01 (6.2-9.8)</p> <p>-Gastroenterology: 6.81</p> <p>-Surgery: 0.11</p> <p>-Emergency: 0.42</p> <p>-Other: 0.68</p> <p>Diagnostic tests (per year)</p> |                                                                                                                                                                                                                                                           |

(range): 4.32 (3.6-5.1)  
-Digestive tract: 2.06  
-Other: 2.26  
Laboratory tests (per year)  
(range): 11.09 (8.7-13.5)  
Drug treatment (days  
treatment/y) (range): 564.38  
(414.2-714.6)  
-Immunomodulators: 152.96  
-Corticosteroids: 86.64  
-Antibiotics: 32.79  
-Other treatments: 291.99  
Parenteral nutrition (d/y):  
3.92 (0.4-7.4)  
Packed cells transfusion (per  
year): 0.01 (-0.01-0.04)  
Day care hospitalisation  
(d/patient/y):  
IFX administration: NA

Post-IFX

Hospital admission (%): 25.0;  
 $p= 0.002$   
Hospital stay (d/y) (range):  
6.25 (1.8-10.7);  $p= 0.002$   
Surgery (%): 4.8;  $p= 0.000$

Surgery (interventions/y)  
(range): 0.06 (0.0-0.1);  $p=$   
0.193

-Perianal surgery: 0.02;  $p=$   
0.107

-Resections: 0.01;  $p= 0.564$

-Ostomy: 0.00;  $p= 1.000$

-Other surgery: 0.02;  $p=$   
0.564

Clinical consultations (per  
year): 6.55 (5.6-7.5);  $p= 0.185$

-Gastroenterology: 5.64;  $p=$   
0.546

-Surgery: 0.02;  $p= 0.257$

-Emergency: 0.17;  $p= 0.063$   
-Other: 0.71;  $p= 0.897$

Diagnostic tests (per year)  
(range) 1.68 (1.1-2.2);  $p=$   
0.000

-Digestive tract: 0.84;  $p=$   
0.000

-Other: 0.83;  $p= 0.000$

Laboratory tests (per year)  
(range): 16.04 (13.0-19.0);  $p=$   
0.001

Drug treatment (days  
treatment/y) (range): 573.92  
(426.4-721.4);  $p= 0.698$

-Immunomodulators: 184.20;  
 $p= 0.080$

-Corticosteroids: 49.55;  $p=$   
0.004

-Antibiotics: 30.13;  $p= 0.375$

-Other treatments: 310.04;  
 $p= 0.530$

Parenteral nutrition (d/y):  
0.40(-0.4-1.2);  $p= 0.008$

Packed cells transfusion (per  
year): 0.00;  $p= 0.317$

Day care hospitalisation  
(d/patient/y) IFX

administration: 6.84 (6.4-  
7.3);  $p= 0.000$

Pre-IFX

Hospital admission (%): 62.3

Hospital stay (d/y) (range):  
11.49 (7.9-15.1)

Surgery (%): 37.7

Surgery (interventions/y)  
(range): 0.42 (0.3-0.6)

-Perianal surgery: 0.36

Taxone  
ra  
2009[6  
4]

Inflixima  
b

Fistulising  
CD: 69

NR

NR

NR

-Resections: 0.01  
-Ostomy: 0.01  
-Other surgery: 0.03

Clinical consultations (per  
year): 7.38 (6.3-8.5)  
-Gastroenterology: 5.65  
-Surgery: 0.72  
-Emergency: 0.41  
-Other: 0.59

Diagnostic tests (per year)  
(range): 5.25 (4.3-6.2)  
-Digestive tract: 3.00  
-Other: 2.25

Laboratory tests (per year)  
(range): 17.13 (13.2-21.1)

Drug treatment (days  
treatment/y) (range): 627.19  
(492.4-762)  
-Immunomodulators: 183.67  
-Corticosteroids: 76.71  
-Antibiotics: 84.29  
-Other treatments: 282.52

Parenteral nutrition (d/y):  
6.56 (-3.4-16.5)  
Packed cells transfusion (per  
year): 0.00  
Day care hospitalisation  
(d/patient/y):  
IFX administration NA

Post-IFX

Hospital admission (%): 37.7;  
 $p= 0.005$   
Hospital stay (d/y) (range):  
6.33 (2.2-10.4);  $p= 0.002$   
Surgery (%): 17.4;  $p= 0.000$

Surgery (interventions/y)  
(range): 0.20 (0.1-0.3);  $p=0.014$   
-Perianal surgery: 0.16;  $p=0.008$   
-Resections: 0.03;  $p=0.564$   
-Ostomy: 0.01;  $p=1.000$   
-Other surgery: 0.00;  $p=0.157$

Clinical consultations (per year): 7.42 (6.5-8.4);  $p=0.971$   
-Gastroenterology: 6.07;  $p=0.484$   
-Surgery: 0.46;  $p=0.163$   
-Emergency: 0.07;  $p=0.006$   
-Other: 0.81;  $p=0.563$

Diagnostic tests (per year)  
(range): 2.33 (1.1-3.3);  $p=0.000$   
-Digestive tract: 0.154;  $p=0.000$   
-Other: 0.80;  $p=0.000$

Laboratory tests (per year)  
(range): 19.00 (15.7-22.3);  $p=0.216$

Drug treatment (days treatment/y) (range): 736.12 (570.4-901.9);  $p=0.266$   
-Immunomodulators: 262.94;  $p=0.000$   
-Corticosteroids: 59.48;  $p=0.077$   
-Antibiotics: 77.39;  $p=0.137$   
-Other treatments: 336.30;  $p=0.263$

Parenteral nutrition (d/y): 1.84 (-1.6-5.3);  $p=0.345$   
Packed cells transfusion (per

|                      |              |     |                                                                                                                                                                                    |    |    |                                                                                                                                                                                                                                                                                                                                                                                                                                                                                                                                                                                                                                                                                                                                                                                                                                                                                                                 |
|----------------------|--------------|-----|------------------------------------------------------------------------------------------------------------------------------------------------------------------------------------|----|----|-----------------------------------------------------------------------------------------------------------------------------------------------------------------------------------------------------------------------------------------------------------------------------------------------------------------------------------------------------------------------------------------------------------------------------------------------------------------------------------------------------------------------------------------------------------------------------------------------------------------------------------------------------------------------------------------------------------------------------------------------------------------------------------------------------------------------------------------------------------------------------------------------------------------|
|                      |              |     |                                                                                                                                                                                    |    |    | year): 0.09 (-0.09-0.3); $p=0.317$<br>Day care hospitalisation (d/patient/y) IFX administration: 7.22 (6.5-8.0); $p=0.000$                                                                                                                                                                                                                                                                                                                                                                                                                                                                                                                                                                                                                                                                                                                                                                                      |
| <b>Kane 2009[96]</b> | Adherent     | 375 |                                                                                                                                                                                    | NR | NR | <p>CD-related health care cost (US \$), mean (SD)<br/>Hospitalisation: 1,283 (4,214)<br/>Outpatient excluding infliximab cost: 2,335 (4,454)<br/>Emergency department visit: 94 (360)<br/>Total medical cost excluding infliximab cost: 5,285 (9,968)<br/>Outpatient infliximab cost: 28,699 (15,514)</p> <p>Baseline Health care resource utilization, n (%)<br/>Hospitalisation: 206 (27.5)<br/>Outpatient visit: 724 (96.5)<br/>Emergency department visit: 210 (28.0)<br/>Ancillary care: 456 (60.8)</p> <p>CD-related health care resource utilization<br/>Any hospitalisation, %: 15.5<br/>Hospital days, mean (SD): 1.1 (4.0)</p>                                                                                                                                                                                                                                                                        |
| <b>Kane 2009[96]</b> | Non-adherent | 196 |                                                                                                                                                                                    | NR | NR | <p>CD-related health care cost (US \$), mean (SD)<br/>Hospitalisation: 4,494 (10,694); <math>p&lt;0.001</math><br/>Outpatient excluding infliximab cost: 3,931 (9,621); <math>p=0.007</math><br/>Emergency department visit: 91 (332); <math>p=0.929</math><br/>Total medical cost excluding infliximab cost: 10,243 (20,818); <math>p&lt;0.001</math><br/>Outpatient infliximab cost: 18,751 (11,731); <math>p&lt;0.001</math></p> <p>Baseline Health care resource utilisation, n (%)<br/>Hospitalisation: 120 (30.6); <math>p=0.264</math><br/>Outpatient visit: 380 (96.9); <math>p=0.717</math><br/>Emergency department visit: 130 (33.2); <math>p=0.070</math><br/>Ancillary care: 186 (47.5); <math>p&lt;0.001</math></p> <p>CD-related health care resource utilisation<br/>Any hospitalisation, %: 29.1; <math>p&lt;0.001</math><br/>Hospital days, mean (SD): 3.1 (8.1); <math>p&lt;0.001</math></p> |
| <b>Wu 2008[97]</b>   | Infliximab   | 262 | During the 6-month baseline period, patients who later lost treatment response and those who did not incurred similar total treatment costs (US \$10,385 vs. \$10,589, $p>0.05$ ). |    | NR | <p>Patients who did not experience LOR with infliximab treatment within 1 year incurred \$19,506 in CD-related medical and pharmacy costs compared to</p> <p>NR</p> <p>CD related ED visit or hospitalisation: 40 patients</p>                                                                                                                                                                                                                                                                                                                                                                                                                                                                                                                                                                                                                                                                                  |

|              |            |    |                                                                                                                                                                                                                                                                                                                                                                                                                                                                                                                                                                                                                                                                                                                     |    |                                                                                                                                                                                                                                                                                   |                                                                                                                                                                                                                                                                                                                                                                                                                                                                                                                                                                                                                                                                                                     |
|--------------|------------|----|---------------------------------------------------------------------------------------------------------------------------------------------------------------------------------------------------------------------------------------------------------------------------------------------------------------------------------------------------------------------------------------------------------------------------------------------------------------------------------------------------------------------------------------------------------------------------------------------------------------------------------------------------------------------------------------------------------------------|----|-----------------------------------------------------------------------------------------------------------------------------------------------------------------------------------------------------------------------------------------------------------------------------------|-----------------------------------------------------------------------------------------------------------------------------------------------------------------------------------------------------------------------------------------------------------------------------------------------------------------------------------------------------------------------------------------------------------------------------------------------------------------------------------------------------------------------------------------------------------------------------------------------------------------------------------------------------------------------------------------------------|
|              |            |    | <p>During the 12-month follow-up period, those who did not experience loss of treatment response incurred \$24,532 in total costs, on average; whereas those who did experience LOR incurred 36% greater mean total costs (\$33,289). The cost difference (\$8756) between the two groups was statistically significant (<math>p &lt; 0.001</math>).</p>                                                                                                                                                                                                                                                                                                                                                            |    | <p>\$27,250, or 40% greater CD-related costs for patients who experienced loss of treatment response. The \$7744 difference was also statistically significant (<math>p &lt; 0.001</math>). Based on these results, 88% of the total cost difference (\$8756) was CD related.</p> |                                                                                                                                                                                                                                                                                                                                                                                                                                                                                                                                                                                                                                                                                                     |
| Ho 2008[12]  | Adalimumab | 22 | <p>Current local costing for financial year 2005–2006:<br/> Adalimumab 40 mg fortnightly treatment: £10 773 (£21 546 for adalimumab 40 mg / weekly);<br/> Infliximab at 5 mg / kg dosing regimen 8-weekly maintenance therapy: £7112</p>                                                                                                                                                                                                                                                                                                                                                                                                                                                                            | NR | NR                                                                                                                                                                                                                                                                                | NR                                                                                                                                                                                                                                                                                                                                                                                                                                                                                                                                                                                                                                                                                                  |
| Saro 2007[6] | Infliximab | 34 | <p>Pre- vs. Post-Infliximab Hospital stay, Mean (CI) €: 2783 (1,041–5051) vs. 679 (57–1374), Cost saving: 2104<br/> Pre- vs. Post-Infliximab surgery, Mean (CI) €: 139 (6–329) vs. 79 (0–239), Cost saving: 60<br/> Pre- vs. Post-Infliximab Clinical consultations, Mean (CI) €: 390 (229–566) vs. 448 (350–568), Cost addition: 58<br/> Pre- vs. Post-Infliximab Diagnostic tests and laboratory analyses, Mean (CI) €: 722 (450–1,005) vs. 807 (671–949), Cost addition: 85<br/> Pre- vs. Post-Infliximab Drug treatment in hospital, Mean (CI) €: 430 (200–795) vs. 585 (233–1118), Cost addition: 155<br/> Pre- vs. Post-Infliximab, Infliximab treatment, Mean (CI) €: 0.00 vs. 7996, Cost addition: 7996</p> | NR | <p>Pre- vs. Post-Infliximab Overall annual cost, Mean (CI) €: 4464 vs. 10594, Cost difference: 6130</p>                                                                                                                                                                           | <p>Pre- vs. Post-Infliximab Hospital stay (days/year), Mean (CI): 8.59 (5.06–12.11) vs. 2.26 (0.54–3.99), <math>p &lt; 0.001</math><br/> Pre- vs. Post-Infliximab Clinical consultations (per year), Mean (CI): 5.80 (4.57–7.03) vs. 6.67 (5.99–7.37), <math>p = 0.158</math><br/> Pre- vs. Post-Infliximab Diagnostic tests and laboratory analyses (per year), Mean (CI): 19.68 (15.08–24.29) vs. 26.59 (24.12–28.45), <math>p = 0.021</math><br/> Pre- vs. Post-Infliximab Drug treatment in hospital (days per year), Mean (CI): 598.39 (290.90–954.66) vs. 704.69 (408.32–1001.02)<br/> Pre- vs. Post-Infliximab, Infliximab (administrations per year), Mean (CI): 0 vs. 4.08 (3.35–4.81)</p> |



|                                             |                             |      |                                                                                                                                                                                                                                                        |    |                                                                                                              |    |                                                                                                                                                                                                                                                                                                                    |                                                                                                                                                                                                                                             |
|---------------------------------------------|-----------------------------|------|--------------------------------------------------------------------------------------------------------------------------------------------------------------------------------------------------------------------------------------------------------|----|--------------------------------------------------------------------------------------------------------------|----|--------------------------------------------------------------------------------------------------------------------------------------------------------------------------------------------------------------------------------------------------------------------------------------------------------------------|---------------------------------------------------------------------------------------------------------------------------------------------------------------------------------------------------------------------------------------------|
|                                             |                             |      |                                                                                                                                                                                                                                                        |    |                                                                                                              |    |                                                                                                                                                                                                                                                                                                                    | Pre- vs. Post-Infliximab Day-care hospitalisation for Infliximab administration, Mean (CI): 0 vs. 4.40 (3.71–5.10)                                                                                                                          |
| <b>Ollendorff 2006</b> [9]                  | Infliximab                  | 2230 | <p>Infusion charges (\$)</p> <p>Mean: \$4,441<br/>SD: \$1,778<br/>Minimum: \$907<br/>Maximum: \$13,489<br/>Median: \$4,099</p> <p>Infusion payments (\$)</p> <p>Mean \$2,793<br/>SD \$990<br/>Minimum \$588<br/>Maximum \$6,066<br/>Median \$2,628</p> | NR | NR                                                                                                           |    | <p>Of the original total of 9724 infusions, 168 were not evaluable because of data quality issues, yielding cost evaluation for 9556 total infusions (4.29 infusions per patient on average).</p> <p>Number of submitted vials<br/>Mean: 4.79<br/>SD: 1.74<br/>Minimum: 2<br/>Maximum: 10<br/>Median: 5</p>        | <p>Paid amounts were reduced by 37% on average in relation to charged amounts. Corresponding median amounts were \$4099 and \$2628, respectively. On a per-vial basis, charged and paid amounts averaged \$927 and \$583, respectively.</p> |
| <b>Jewell 2005</b> [67]                     | Infliximab                  | 205  | Cost of 353 infliximab infusions: £562719                                                                                                                                                                                                              | NR | Total reductions in direct costs were estimated at £591006 (difference in cost for pre and post infliximab). | NR | <p>Cost associated with 353 infusions during the treatment. Net decrease in direct cost was £28 287 or the equivalent of £137.98 per patient</p> <p>Reductions of £176677 came from fewer surgical procedures, examination under anaesthetics, diagnostic tests, blood transfusions and nutritional therapies.</p> |                                                                                                                                                                                                                                             |
| <b>ACCENT I Trial (Rutgeerts 2004)</b> [68] | Placebo (Episodic strategy) | 188  | NA                                                                                                                                                                                                                                                     | NA | NA                                                                                                           | NA | <p>Significantly fewer Crohn's disease-related hospitalisations occurred in patients in the infliximab 5 and 10 mg/kg scheduled treatment strategy groups (23 and 24 per 100 patients, respectively) compared with patients in the episodic treatment</p>                                                          |                                                                                                                                                                                                                                             |

strategy group (38 per 100 patients,  $p=0.047$  and  $p=0.023$ , respectively, for each comparison).

|                                            |                                          |     |    |    |    |                                                                                                                                                                                                                                                                                                                                                                                                                                                                                                                            |                                                                    |
|--------------------------------------------|------------------------------------------|-----|----|----|----|----------------------------------------------------------------------------------------------------------------------------------------------------------------------------------------------------------------------------------------------------------------------------------------------------------------------------------------------------------------------------------------------------------------------------------------------------------------------------------------------------------------------------|--------------------------------------------------------------------|
| <b>ACCENT I Trial (Rutgeerts 2004)[68]</b> | Infliximab 5 mg/kg (Scheduled strategy)  | 192 | NA | NA | NA | NA                                                                                                                                                                                                                                                                                                                                                                                                                                                                                                                         |                                                                    |
| <b>ACCENT I Trial (Rutgeerts 2004)[68]</b> | Infliximab 10 mg/kg (Scheduled strategy) | 193 | NA | NA | NA | NA                                                                                                                                                                                                                                                                                                                                                                                                                                                                                                                         |                                                                    |
| <b>ACCENT II Trial (Sands 2004)[69]</b>    | Placebo maintenance                      | 143 | NR | NR | NR | <p>Hospitalisations (mean number per 100 patients with the total number in parentheses): 31 (45)<br/> Hospitalisation days (mean number of days hospitalised per patient): 2.4<br/> All surgeries and procedures (mean number per 100 patients with the total number in parentheses): 118 (169)<br/> Inpatient surgeries and procedures (mean number per 100 patients with the total number in parentheses): 45 (65)<br/> Major surgeries (mean number per 100 patients with the total number in parentheses): 13 (18)</p> | 18.9% patients were hospitalised.                                  |
| <b>ACCENT II Trial (Sands 2004)[69]</b>    | Infliximab maintenance                   | 139 | NR | NR | NR | <p>Hospitalisations (mean number per 100 patients with the total number in</p>                                                                                                                                                                                                                                                                                                                                                                                                                                             | 8.6% patients were hospitalised, $p<0.05$ vs. placebo maintenance. |

2004][6  
9] ance

parentheses): 14 (19),  $p < 0.05$   
vs. placebo maintenance  
Hospitalisation days (mean  
number of days hospitalised  
per patient): 0.8,  $p = 0.110$  vs.  
placebo maintenance  
All surgeries and procedures  
(mean number per 100  
patients with the total  
number in parentheses): 60  
(83),  $p < 0.01$  vs. placebo  
maintenance  
Inpatient surgeries and  
procedures (mean number  
per 100 patients with the  
total number in  
parentheses): 10 (14)  
 $p < 0.001$  vs. placebo  
maintenance  
Major surgeries (mean  
number per 100 patients  
with the total number in  
parentheses): 2 (3),  $p < 0.05$   
vs. placebo maintenance

|                                 |                |    |                                                                                                                                                         |    |    |    |
|---------------------------------|----------------|----|---------------------------------------------------------------------------------------------------------------------------------------------------------|----|----|----|
| <b>Arnott<br/>2001[7<br/>1]</b> | Inflixima<br>b | 39 | The cost per vial of Infliximab<br>(100 mg) the institution was<br>£463.00. Therefore, the median<br>cost per patient was £1389<br>(range, £926-£2315). | NR | NR | NR |
|---------------------------------|----------------|----|---------------------------------------------------------------------------------------------------------------------------------------------------------|----|----|----|

**Abraha  
m  
2013[1  
00]**

Inflixima  
b

CD: 8042

NR

NR

NR

First-Year Hospitalisation  
Rate Reductions by Drug  
Therapy Durations

Duration of therapy: relative  
rate reduction in  
hospitalisations (compared  
with drug exposure)(%)  
(1) Immunomodulator  
therapy  
1 month: 4.9  
3 months: 13.9  
6 months: 25.9  
9 months: 36.2  
12 months: 45.1

A 50% relative reduction  
in surgery was observed  
among patients receiving  
7 months of infliximab or  
5 months of dual therapy.  
Analysis of dose-response  
data revealed 73.1% and  
92% reductions in risk of  
hospitalisation and  
surgery, respectively,  
after 9 months of dual  
therapy.

(2) Anti-TNF- $\alpha$  monotherapy

1 month: 1.3

3 months: 3.9

6 months: 37.9

9 months: 67.1

12 months: 82.6

(3) Dual therapy

1 month: 0.7

3 months: 2.1

6 months: 4.1

9 months: 86.1

## Section 5. Quality of life

### 5A. Data on quality of life in ulcerative colitis

The QoL data for UC patients are presented in Table S9.

The most common scales used were IBDQ and the Cleveland Global Quality of Life (CGQL) scale.

In the ULTRA 2 trial (Sandborn 2013[72]), in the adalimumab treatment group, the mean (SD) baseline IBDQ score was 128 (29). At week 8, it decreased to 29 (36), at week 32 it decreased to 28 (41) and at week 52 it decreased to 27 (42). In a multinational study (Laharie 2012[26]), in the infliximab treatment group, the IBDQ median score increased by 100 points (75-112), between baseline and day 98.

**Table S9. Quality of life in ulcerative colitis**

| Study name                         | Countries                                                                 | Treatment groups | No. of patients | Name of QoL questionnaire | QoL questionnaire; Baseline Score, Mean (SD), Median, Range, p value | QoL questionnaire Score (at Endpoint); Mean (SD), Median, Range, p value | QoL questionnaire Score (change from baseline); Mean (SD), Median, Range; p value                                        | Comments                                                                                                                                                                                                                                                                                                                                                                                   |
|------------------------------------|---------------------------------------------------------------------------|------------------|-----------------|---------------------------|----------------------------------------------------------------------|--------------------------------------------------------------------------|--------------------------------------------------------------------------------------------------------------------------|--------------------------------------------------------------------------------------------------------------------------------------------------------------------------------------------------------------------------------------------------------------------------------------------------------------------------------------------------------------------------------------------|
| ULTRA 2 Trial (Sandborn 2013) [72] | Multinational (North America, Europe, Australia, New Zealand, and Israel) | Adalimumab       | 248             | IBDQ                      | Mean (SD): 128 (29)                                                  | NR                                                                       | Mean (SD) values<br>At week 8: 29 (36), $p < 0.05$<br>At week 32: 28 (41), $p < 0.05$<br>At week 52: 27 (42), $p < 0.05$ | Among the 494 enrolled patients, 260 (52.6%) were observed to have achieved clinical remission during at least 1 visit during the 52 week clinical trial. Achievement of clinical remission at any time was associated with increases from baseline of 35.8 (SE=1.7) in the total IBDQ score, 5.0 (SE=0.4) in the Physical Component Summary (PCS) score of the SF-36, and 6.4 (SE=0.5) in |

the Mental Component Summary (MCS) score of the SF-36 and with reductions of 20.7 (SE=1.9) in WPAI total work productivity impairment (TWPI) score and 19.3 (SE=1.3) in total activity impairment (TAI) score (all  $p<0.05$ ). Including the effect of current remission status, patients who achieved and sustained clinical remission for 6 months are estimated to experience increases of 49.6 (SE=2.3) in total IBDQ score, 7.9 (SE=0.5) in the PCS, and 8.2 (SE=0.7) in the MCS and decreases of 31.9 (SE=2.4) in TWPI score and 28.4 (SE=1.8) in TAI score compared to similar patients who did not achieve clinical remission (all  $p<0.05$ ).

|                                           |                                                                           |                               |     |                          |                     |                                          |                                                                                       |
|-------------------------------------------|---------------------------------------------------------------------------|-------------------------------|-----|--------------------------|---------------------|------------------------------------------|---------------------------------------------------------------------------------------|
| <b>ULTR A2 Trial (Sandborn 2013) [72]</b> | Multinational (North America, Europe, Australia, New Zealand, and Israel) | Placebo                       | 246 | IBDQ                     | Mean (SD): 123 (33) | NR                                       | Mean (SD) values<br>At week 8: 20 (36)<br>At week 32: 20 (41)<br>At week 52: 197 (41) |
| <b>Gu 2013</b>                            | USA                                                                       | Biologics: Anti-TNF- $\alpha$ | 25  | Cleveland Global Quality | NR                  | QoL: 8.0 (2.4)<br>Quality of health: 7.8 | NR                                                                                    |

|              |     |                                                                                            |     |                                               |    |                                                                                                   |    |
|--------------|-----|--------------------------------------------------------------------------------------------|-----|-----------------------------------------------|----|---------------------------------------------------------------------------------------------------|----|
| [22]         |     | therapy impact on outcomes after TPC/IPAA for UC                                           |     | of Life (CGQL) Scale                          |    | (2.7)<br>Quality of energy: 7.5 (2.7)<br>CQGL: 0.8 (0.3)                                          |    |
| Gu 2013 [22] | USA | No Biologics: Anti-TNF- $\alpha$ therapy impact on outcomes after TPC/IPAA for UC          | 156 | Cleveland Global Quality of Life (CGQL) Scale | NR | QoL: 8.0 (1.9)<br>Quality of health: 8.0 (2.0)<br>Quality of energy: 7.5 (2.2)<br>CQGL: 0.8 (0.2) | NR |
| Gu 2013 [22] | USA | Biologics: Anti-TNF- $\alpha$ therapy impact on short-term outcomes after STC/EI for UC    | 142 | Cleveland Global Quality of Life (CGQL) Scale | NR | NR                                                                                                | NR |
| Gu 2013 [22] | USA | No Biologics: Anti-TNF- $\alpha$ impact therapy on short-term outcomes after STC/EI for UC | 265 | Cleveland Global Quality of Life (CGQL) Scale | NR | NR                                                                                                | NR |
| Gu 2013 [22] | USA | Biologics: Anti-TNF- $\alpha$ therapy use before colectomy on short-                       | 88  | Cleveland Global Quality of Life (CGQL) Scale | NR | QoL: 7.8 (1.6)<br>Quality of health: 8.0 (1.7)<br>Quality of energy: 7.3 (1.9)<br>CQGL: 0.8 (0.2) | NR |

|                          |                                                     |                                                                                                                                                           |     |                                               |                            |                                                                                                   |                                                                                     |                                                                                                                   |  |
|--------------------------|-----------------------------------------------------|-----------------------------------------------------------------------------------------------------------------------------------------------------------|-----|-----------------------------------------------|----------------------------|---------------------------------------------------------------------------------------------------|-------------------------------------------------------------------------------------|-------------------------------------------------------------------------------------------------------------------|--|
|                          |                                                     | and long-term outcomes after CP/IPAA for UC in patients who underwent initial STC                                                                         |     |                                               |                            |                                                                                                   |                                                                                     |                                                                                                                   |  |
| <b>Gu 2013 [22]</b>      | USA                                                 | No Biologics: Anti-TNF- $\alpha$ therapy use before colectomy on short- and long-term outcomes after CP/IPAA for UC in patients who underwent initial STC | 164 | Cleveland Global Quality of Life (CGQL) Scale | NR                         | QoL: 7.8 (1.8)<br>Quality of health: 8.0 (2.0)<br>Quality of energy: 6.9 (2.2)<br>CQGL: 0.8 (0.2) | NR                                                                                  |                                                                                                                   |  |
| <b>Laharie 2012 [26]</b> | Multinational (France, Spain, Belgium, and Finland) | Ciclosporin                                                                                                                                               | 58  | IBDQ                                          | Median (IQR): 103 (89–118) | NR                                                                                                | Median score increased by 78 points (IQR 66–104; n=19) between baseline and day 98. | Responses to the inflammatory bowel disease questionnaire were available in only 36 patients evaluable at day 98. |  |
| <b>Laharie 2012 [26]</b> | Multinational (France, Spain,                       | Infliximab                                                                                                                                                | 57  | IBDQ                                          | Median (IQR): 96 (84–113)  | NR                                                                                                | Median score increased by 100 points (75–112; 17) between baseline and day 98.      |                                                                                                                   |  |



Belgium  
, and  
Finland)

|                                    |                                |                            |        |               |                                                        |                                                                                                                                                                                                                                                                                                                                                                                         |                                                            |                                                                                                                                                          |
|------------------------------------|--------------------------------|----------------------------|--------|---------------|--------------------------------------------------------|-----------------------------------------------------------------------------------------------------------------------------------------------------------------------------------------------------------------------------------------------------------------------------------------------------------------------------------------------------------------------------------------|------------------------------------------------------------|----------------------------------------------------------------------------------------------------------------------------------------------------------|
| <b>Tursi<br/>2010<br/>[74]</b>     | Italy                          | Infliximab                 | 23     | IBDQ          | Mean: 48                                               | Mean: 198, $p < 0.05$ vs. baseline                                                                                                                                                                                                                                                                                                                                                      | NR                                                         | The Mayo subscore for endoscopy decreased from mean value of 3 to mean value $< 1$ (range 0-1) at the time of last endoscopic assessment ( $p < 0.05$ ). |
| <b>Probert<br/>2003<br/>[39]</b>   | Multinational (UK and Germany) | Placebo group              | 20     | IBDQ; EuroQol | Mean (SD)<br>IBDQ: 114 (29)<br>EuroQol: 49 (17)        | Week 6<br>Mean (SD)<br>IBDQ: 139 (43)<br>EuroQol: 54 (23)                                                                                                                                                                                                                                                                                                                               | Improvement: Mean (SD)<br>IBDQ: 25 (28)<br>EuroQol: 4 (16) |                                                                                                                                                          |
| <b>Probert<br/>2003<br/>[39]</b>   | Multinational (UK and Germany) | Infliximab group           | 23     | IBDQ; EuroQol | Mean (SD)<br>IBDQ: 127 (40)<br>EuroQol: 52 (16)        | Week 6<br>Mean (SD)<br>IBDQ: 163 (40)<br>EuroQol: 59 (19)                                                                                                                                                                                                                                                                                                                               | Improvement: Mean (SD)<br>IBDQ: 36 (49)<br>EuroQol: 7 (17) |                                                                                                                                                          |
| <b>Casellas<br/>2012<br/>[101]</b> | Spain                          | Infliximab/adalimumab: 7/4 | UC: 11 | IBDQ- 37      | Median (IQR)<br>Global IBDQ score: 144.0 (131.4-185.4) | Median (IQR)<br>Global IBDQ score<br>235.0 (219.0–241.0);<br>not significant<br>Digestive symptoms:<br>52.0 (49.6–54.4); not<br>significant<br>Systemic symptoms:<br>44.8 (42.0–45.5);<br>$p = 0.056$<br>Emotional symptoms:<br>50.4 (44.8–54.4); not<br>significant.<br>Functional symptoms:<br>46.9 (45.5–49.0);<br>$p = 0.02$<br>Social affectation: 39.6<br>(39.6–40.8); $p = 0.04$ | NR                                                         |                                                                                                                                                          |



## 5B. Data on quality of life in Crohn's Disease

The most common scale used was IBDQ. The other scales reported across studies were WPAI, SF-36, EQ-5D and MADRS.

In the CARE trial (Louis 2013[5]), mean baseline scores indicated severe productivity impairment and poor QoL. At week 20, 60% of infliximab-naïve and 47% of infliximab primary non-responders achieved clinically important improvements ( $\geq 9$  points) on the SIBDQ and 51% and 43%, respectively, achieved the minimum clinically important difference (improvement  $\geq 7$  percentage points) for total work productivity impairment (non-responder imputation). At week 20, 64% of infliximab-naïve and 55% of infliximab primary non-responders achieved clinically important improvements in total activity impairment.

**Table S10. Quality of Life in Crohn's Disease**

| Study name                  | Countries                                                 | Treatment groups        | No. of patients | Name of QoL questionnaire                                            | QoL questionnaire; Baseline Score, Mean (SD), Median, Range, p value                                                                                                                                   | QoL questionnaire Score (at Endpoint); Mean (SD), Median, Range, p value                                                                        | QoL questionnaire Score (change from baseline); Mean (SD), Median, Range; p value                                                                                                                                                                                                                                                    | Comments |
|-----------------------------|-----------------------------------------------------------|-------------------------|-----------------|----------------------------------------------------------------------|--------------------------------------------------------------------------------------------------------------------------------------------------------------------------------------------------------|-------------------------------------------------------------------------------------------------------------------------------------------------|--------------------------------------------------------------------------------------------------------------------------------------------------------------------------------------------------------------------------------------------------------------------------------------------------------------------------------------|----------|
| Patil 2013 [41]             | USA                                                       | Infliximab              | 30              | SIBDQ                                                                | NR                                                                                                                                                                                                     | At 2 months, N= 28: 53.75 (13.34); $p= 0.02$<br>At 9 months, N= 26: 54.67 (15.76); $p= 0.045$<br>At 12 months, N= 25: 54.92 (13.67); $p= 0.026$ | NR                                                                                                                                                                                                                                                                                                                                   |          |
| Patil 2013 [41]             | USA                                                       | Adalimumab/Certolizumab | 28              | SIBDQ                                                                | NR                                                                                                                                                                                                     | At 2 months, N= 21: 44.3 (14.39)<br>At 9 months, N= 15: 44.8 (11.16)<br>At 12 months, N= 19: 50.55 (11.43)                                      | NR                                                                                                                                                                                                                                                                                                                                   |          |
| CARE Trial (Louis 2013 [5]) | Multinational (Austria, Belgium, Czech Republic, Denmark, | Adalimumab              | 945             | Work productivity and activity impairment questionnaire (WPAI) SIBDQ | WPAI:CD component score; Mean (SD)<br>Absenteeism (N= 468): 23.1 (34.4)<br>Presenteeism (N= 484): 45.4 (27.2)<br>Total work productivity impairment (N= 442): 51.9 (29.0)<br>Total activity impairment | NR                                                                                                                                              | Change from baseline to week 4<br>WPAI:CD component score<br>Absenteeism (N= 353): -9.6 (30.0)<br>Presenteeism (N= 395): -17.3 (27.1)<br>Total work productivity impairment (N= 327): -18.4 (30.0)<br>Total activity impairment (N= 856): -21.3 (27.0)<br>SIBDQ total score (N= 880): 12.1 (22.0)<br>Change from baseline to week 20 |          |

|                        |                                                                                                               |            |    |                                                        |                                                                  |                                                                                                                                                                                                                                           |                                                                                                                                                                                                                                                                 |
|------------------------|---------------------------------------------------------------------------------------------------------------|------------|----|--------------------------------------------------------|------------------------------------------------------------------|-------------------------------------------------------------------------------------------------------------------------------------------------------------------------------------------------------------------------------------------|-----------------------------------------------------------------------------------------------------------------------------------------------------------------------------------------------------------------------------------------------------------------|
|                        | Finland, France, Germany, Greece, Ireland, Italy, Norway, Portugal, Slovakia, Spain, Sweden, Switzerland, UK) |            |    |                                                        | (N= 907): 56.6 (25.8)<br>SIBDQ total score (N= 910): 36.7 (10.3) |                                                                                                                                                                                                                                           | WPAI:CD component score<br>Absenteeism (N= 328): -9.8 (31.7)<br>Presenteeism (N= 360): -20.0 (30.9)<br>Total work productivity impairment (N= 302): -21.4 (33.6)<br>Total activity impairment (N= 747): -25.9 (29.7)<br>SIBDQ total score (N= 763): 14.7 (12.9) |
| <b>Ghazi 2013 [44]</b> | USA                                                                                                           | Step Up    | 39 | Short Inflammatory Bowel Disease Questionnaire (SIBDQ) | Baseline SIBDQ: 52 (14)                                          | Mean (SD)<br>At 12 months, QoL: 58 (12)                                                                                                                                                                                                   | Mean (SD)<br>At 12 months, QoL: 4.8 (10)                                                                                                                                                                                                                        |
| <b>Ghazi 2013 [44]</b> | USA                                                                                                           | Early Bio  | 54 | Short Inflammatory Bowel Disease Questionnaire (SIBDQ) | Baseline SIBDQ: 43 (14);<br>p= 0.003                             | Mean (SD)<br>At 12 months, QoL: 53 (13)                                                                                                                                                                                                   | Mean (SD)<br>At 12 months, QoL: 9.9 (13)                                                                                                                                                                                                                        |
| <b>Zorzi 2012 [48]</b> | Italy                                                                                                         | Infliximab | 44 | IBDQ                                                   | NR                                                               | Induction:<br>Significant improvement in IBDQ was found at week 6 compared to baseline in 16 patients, $p < 0.0001$<br>Maintenance:<br>No significant improvement in IBDQ was found at week 6 and 54 compared to baseline in 10 patients. | NR                                                                                                                                                                                                                                                              |

|                                          |                                     |                   |                          |             |                                                                                                                                                                                  |                                                                                                                                                                                                                                                                                                                                      |    |                                                                                                                                                                                               |
|------------------------------------------|-------------------------------------|-------------------|--------------------------|-------------|----------------------------------------------------------------------------------------------------------------------------------------------------------------------------------|--------------------------------------------------------------------------------------------------------------------------------------------------------------------------------------------------------------------------------------------------------------------------------------------------------------------------------------|----|-----------------------------------------------------------------------------------------------------------------------------------------------------------------------------------------------|
| <b>Zorzi 2012 [48]</b>                   | Italy                               | Adalimumab        | 49                       | IBDQ        | NR                                                                                                                                                                               | Induction:<br>Significant improvement in IBDQ was found at week 4 compared to baseline in 34 patients, $p<0.01$<br>Maintenance:<br>Significant improvement in IBDQ was found at each scheduled visit compared to baseline in 10 patients, $p<0.002$ .                                                                                | NR |                                                                                                                                                                                               |
| <b>ACCESSTrial (Panaccione 2011)[14]</b> | Canada                              | Adalimumab        | 304                      | SIBDQ, WPAI | SIBDQ; Mean (SD): 36 (10)<br>WPAI component scores<br>Absenteeism; Mean (SD): 16 (28)<br>Presenteeism; Mean (SD): 50 (25)<br>TWPI; Mean (SD): 57 (25)<br>TAI; Mean (SD): 63 (24) | SIBDQ;<br>Week 4, n= 301: 46<br>Week 8, n= 303: 47<br>Week 12, n= 303: 48<br>Week 24, n= 303: 49<br>WPAI component scores, Mean<br>TWAI;<br>Week 4, n= 182: 33<br>Week 8, n= 204: 33<br>Week 12, n= 214: 29<br>Week 24, n= 222: 29<br>TAI;<br>Week 4, n= 297: 39<br>Week 8, n= 302: 39<br>Week 12, n= 303: 35<br>Week 24, n= 303: 33 | NR | *SIBDQ, TWPI, TAI changes at all visits vs. baseline was significant<br>*Absenteeism and presenteeism score changes given for TNF-naïve and infliximab-experienced subgroups but not overall. |
| <b>ADHERE (Panaccione 2010)[59]</b>      | Multinational (Europe, USA, Canada) | Placebo           | 261 (139 entered ADHERE) | IBDQ        | Median: 125                                                                                                                                                                      | Represented graphically                                                                                                                                                                                                                                                                                                              | NR |                                                                                                                                                                                               |
| <b>ADHERE (Panaccione 2010)[59]</b>      | Multinational (Europe, USA, Canada) | Adalimumab<br>eow | 260 (144 entered ADHERE) | IBDQ        | Median: 124                                                                                                                                                                      | Represented graphically                                                                                                                                                                                                                                                                                                              | NR |                                                                                                                                                                                               |

|                                        |                                     |                   |                          |                        |                                                                                                                                                                                     |                                                                                                                                                                                                                                                                                                                                                                                                                                                                                                                |                                                                                                                                                                                                                                                                                                                                                                                                                                                                                                                                                                                                                                                                                                                                                                                                                                                                                                                                                                                      |                                                                                                                                                                                                                                                                                                                                                                                                                                                               |
|----------------------------------------|-------------------------------------|-------------------|--------------------------|------------------------|-------------------------------------------------------------------------------------------------------------------------------------------------------------------------------------|----------------------------------------------------------------------------------------------------------------------------------------------------------------------------------------------------------------------------------------------------------------------------------------------------------------------------------------------------------------------------------------------------------------------------------------------------------------------------------------------------------------|--------------------------------------------------------------------------------------------------------------------------------------------------------------------------------------------------------------------------------------------------------------------------------------------------------------------------------------------------------------------------------------------------------------------------------------------------------------------------------------------------------------------------------------------------------------------------------------------------------------------------------------------------------------------------------------------------------------------------------------------------------------------------------------------------------------------------------------------------------------------------------------------------------------------------------------------------------------------------------------|---------------------------------------------------------------------------------------------------------------------------------------------------------------------------------------------------------------------------------------------------------------------------------------------------------------------------------------------------------------------------------------------------------------------------------------------------------------|
| <b>ADHERE (Panaccione 2010)[59]</b>    | Multinational (Europe, USA, Canada) | Adalimumab weekly | 257 (184 entered ADHERE) | IBDQ                   | Median: 122                                                                                                                                                                         | Represented graphically                                                                                                                                                                                                                                                                                                                                                                                                                                                                                        | NR                                                                                                                                                                                                                                                                                                                                                                                                                                                                                                                                                                                                                                                                                                                                                                                                                                                                                                                                                                                   |                                                                                                                                                                                                                                                                                                                                                                                                                                                               |
| <b>Tursi 2010 [74]</b>                 | Italy                               | Infliximab        | 39                       | IBDQ                   | Mean: 48                                                                                                                                                                            | Mean: 198, $p < 0.005$ vs. baseline                                                                                                                                                                                                                                                                                                                                                                                                                                                                            | NR                                                                                                                                                                                                                                                                                                                                                                                                                                                                                                                                                                                                                                                                                                                                                                                                                                                                                                                                                                                   |                                                                                                                                                                                                                                                                                                                                                                                                                                                               |
| <b>CHOICE-trial (Lichter 2010)[84]</b> | USA                                 | Adalimumab        | 673                      | SIBDQ, WPAI, TAI, TWPI | SIBDQ; Mean (SD): 37.4 (11)<br>WPAI component scores Absenteeism; Mean: 14.8 (25.1)<br>Presenteeism; Mean: 44.3 (27)<br>TWPI; Mean (SD): 49.4 (29.3)<br>TAI; Mean (SD): 57.9 (26.3) | WPAI component scores, Mean Absenteeism;<br>Week 4: 6, $p < 0.05$<br>Week 8: 8, $p < 0.05$<br>Week 12: 7, $p < 0.05$<br>Week 24: 9, $p < 0.05$<br>Presenteeism;<br>Week 4: 29, $p < 0.05$<br>Week 8: 28, $p < 0.05$<br>Week 12: 28, $p < 0.05$<br>Week 24: 25, $p < 0.05$<br>TWAI;<br>Week 4: 31, $p < 0.05$<br>Week 8: 31, $p < 0.05$<br>Week 12: 31, $p < 0.05$<br>Week 24: 28, $p < 0.05$<br>TAI;<br>Week 4: 39, $p < 0.05$<br>Week 8: 38, $p < 0.05$<br>Week 12: 38, $p < 0.05$<br>Week 24: 34, $p < 0.05$ | SIBDQ;<br>Week 4, n=645: 9.1 (10.5), $p < 0.001$<br>Week 8, n=611: 9.1 (11.7), $p < 0.001$<br>Week 12, n=503: 9.5 (11.7), $p < 0.001$<br>Week 24, n=290: 11.9 (12.6), $p < 0.001$<br>WPAI component scores, Mean (SD) Absenteeism;<br>Week 4, n=339: -8.3 (24.1), $p < 0.05$<br>Week 8, n=321: -6.5 (26.3), $p < 0.05$<br>Week 12, n=259: -7.5 (24.5), $p < 0.05$<br>Week 24, n=141: -7.2 (31.0), $p < 0.05$<br>Presenteeism;<br>Week 4, n=358: -15.2 (27.4), $p < 0.05$<br>Week 8, n=337: -15.2 (29.7), $p < 0.05$<br>Week 12, n=272: -15.7 (29.3), $p < 0.05$<br>Week 24, n=146: -18 (29.7), $p < 0.05$<br>TWPI;<br>Week 4, n=333: -17.9 (30.8), $p < 0.05$<br>Week 8, n=317: -17.5 (32.0), $p < 0.05$<br>Week 12, n=256: -17.3 (31.4), $p < 0.05$<br>Week 24, n=136: -19.4 (34.5), $p < 0.05$<br>TAI<br>Week 4, n=642: -18.8 (28.0), $p < 0.05$<br>Week 8, n=606: -19.2 (30.0), $p < 0.05$<br>Week 12, n=505: -0.5 (30.0), $p < 0.05$<br>Week 24, n=287: -23.9 (32.3), $p < 0.05$ | *The 9-point threshold, which correlates with a 100-point change on the CDAI, was met or surpassed in the all adalimumab patients<br>*At all scheduled visits, the mean changes in work productivity component (absenteeism, Presenteeism and TWPI) scores represented statistically significant improvements compared with baseline<br>*SIBDQ, Short Inflammatory Bowel Disease Questionnaire; TAI, total activity impairment; TWPI, total work productivity |

| Study                                                      | Intervention                                              | n   | Outcomes          | Dimensions of IBDQ, Mean (SD); |                                |
|------------------------------------------------------------|-----------------------------------------------------------|-----|-------------------|--------------------------------|--------------------------------|
|                                                            |                                                           |     |                   | Week 6                         | Week 16                        |
| WEL<br>COM<br>E<br>trial<br>(Sandbor<br>n<br>2010<br>)[10] | Certoliz<br>umab<br>(every 2<br>week,<br>mainten<br>ance) | 161 | IBDQ, WPAI-<br>CD | Dimensions of IBDQ, Mean (SD); | Dimensions of IBDQ, Mean (SD); |
|                                                            |                                                           |     |                   | Total IBDQ score: 120.4 (29.4) | Total IBDQ score               |
|                                                            |                                                           |     |                   | Week 6, n= 160: 167.8 (28.3)   | Week 6, n= 160: 47.9 (30.0)    |
|                                                            |                                                           |     |                   | Week 16, n= 116: 163.4 (32.3)  | Week 16, n= 116: 41.0 (35.6)   |
|                                                            |                                                           |     |                   | Week 26, n= 71: 171.7 (30.3)   | Week 26, n= 71: 52.0 (37.6)    |
|                                                            |                                                           |     |                   | Bowel symptoms                 | Bowel symptoms                 |
|                                                            |                                                           |     |                   | Week 6, n= 161: 53.4 (8.3)     | Week 6, n= 160: 14.9 (9.4)     |
|                                                            |                                                           |     |                   | Week 16, n= 116: 51.1 (10.4)   | Week 16, n= 116: 12.0 (11.9)   |
|                                                            |                                                           |     |                   | Week 26, n= 71: 54.3 (9.9)     | Week 26, n= 71: 15.9 (12.9)    |
|                                                            |                                                           |     |                   | Systemic symptoms              | Systemic symptoms              |
|                                                            |                                                           |     |                   | Week 6, n= 161: 23.9 (5.3)     | Week 6, n= 161: 8.1 (5.6)      |
|                                                            |                                                           |     |                   | Week 16, n= 116: 22.6 (6.2)    | Week 16, n= 116: 6.4 (6.5)     |
|                                                            |                                                           |     |                   | Week 26, n= 71: 23.6 (5.9)     | Week 26, n= 71: 8.0 (6.9)      |
|                                                            |                                                           |     |                   | Emotional function             | Emotional function             |
|                                                            |                                                           |     |                   | Week 6, n= 161: 62.1 (12.8)    | Week 6, n= 160: 16.0 (12.9)    |
|                                                            |                                                           |     |                   | Week 16, n= 116: 61.5 (13.4)   | Week 16, n= 116: 15.0 (14.1)   |
|                                                            |                                                           |     |                   | Week 26, n= 71: 64.4 (12.2)    | Week 26, n= 71: 19.0 (15.0)    |
|                                                            |                                                           |     |                   | Social function                | Social function                |
|                                                            |                                                           |     |                   | Week 6, n= 161: 28.4 (6.4)     | Week 6, n= 160: 8.8 (6.8)      |
|                                                            |                                                           |     |                   | Week 16, n= 116: 28.2 (6.8)    | Week 16, n= 116: 7.5 (7.3)     |
|                                                            |                                                           |     |                   | Week 26, n= 71: 29.5 (6.3)     | Week 26, n= 71: 9.2 (7.3)      |
|                                                            |                                                           |     |                   | WPAI:CD scores, Mean (SD);     |                                |
|                                                            |                                                           |     |                   | Absenteeism                    |                                |
|                                                            |                                                           |     |                   | Week 6, n= 87: 6.3 (20.4)      |                                |
|                                                            |                                                           |     |                   | Week 16, n= 69: 11.9 (27.0)    |                                |
|                                                            |                                                           |     |                   | Week 26, n= 34: 16.5 (32.7)    |                                |
|                                                            |                                                           |     |                   | Presenteeism                   |                                |
|                                                            |                                                           |     |                   | Week 6, n= 90: 22.2 (19.7)     |                                |
|                                                            |                                                           |     |                   | Week 16, n= 67: 27.6 (24.2)    |                                |
|                                                            |                                                           |     |                   | Week 26, n= 33: 26.4 (22.8)    |                                |
|                                                            |                                                           |     |                   | Overall work impairment        |                                |
|                                                            |                                                           |     |                   | Week 6, n= 84: 23.2 (21.2)     |                                |
|                                                            |                                                           |     |                   | Week 16, n= 64: 29.7 (25.9)    |                                |
|                                                            |                                                           |     |                   | Week 26, n= 29: 27.4 (24.0)    |                                |

|                                                                          |                                                                                                                                                                                                                           |                                                           |     |                   |                                                                                                                                                                                                                                                                                                                                                                                                                                          |                                                                                                                                                                                                                                                                                                                                                                                                                                                                                                                                                                                                                                                                                                                                                                                                                                                                                                                                                                                                                                                             |                                                                                                                                                                                                                                                                                                                                                                                                                                                                                                                                                                                                             |  |                                                                                                                         |
|--------------------------------------------------------------------------|---------------------------------------------------------------------------------------------------------------------------------------------------------------------------------------------------------------------------|-----------------------------------------------------------|-----|-------------------|------------------------------------------------------------------------------------------------------------------------------------------------------------------------------------------------------------------------------------------------------------------------------------------------------------------------------------------------------------------------------------------------------------------------------------------|-------------------------------------------------------------------------------------------------------------------------------------------------------------------------------------------------------------------------------------------------------------------------------------------------------------------------------------------------------------------------------------------------------------------------------------------------------------------------------------------------------------------------------------------------------------------------------------------------------------------------------------------------------------------------------------------------------------------------------------------------------------------------------------------------------------------------------------------------------------------------------------------------------------------------------------------------------------------------------------------------------------------------------------------------------------|-------------------------------------------------------------------------------------------------------------------------------------------------------------------------------------------------------------------------------------------------------------------------------------------------------------------------------------------------------------------------------------------------------------------------------------------------------------------------------------------------------------------------------------------------------------------------------------------------------------|--|-------------------------------------------------------------------------------------------------------------------------|
|                                                                          |                                                                                                                                                                                                                           |                                                           |     |                   |                                                                                                                                                                                                                                                                                                                                                                                                                                          |                                                                                                                                                                                                                                                                                                                                                                                                                                                                                                                                                                                                                                                                                                                                                                                                                                                                                                                                                                                                                                                             |                                                                                                                                                                                                                                                                                                                                                                                                                                                                                                                                                                                                             |  | Daily activity impairment<br>Week 6, n= 159: 33.6 (24.8)<br>Week 16, n= 114: 35.3 (29.1)<br>Week 26, n= 69: 30.4 (25.6) |
| <b>WEL<br/>COM<br/>E<br/>trial<br/>(Sandbor<br/>n<br/>2010<br/>)[10]</b> | Multina<br>tional<br>(Austria<br>,<br>Belgium<br>,<br>Canada,<br>Denmar<br>k,<br>France,<br>German<br>y, Italy,<br>Norway<br>,<br>Netherl<br>ands,<br>Spain,<br>Sweden<br>,<br>Switzerl<br>and,<br>the UK,<br>and<br>USA) | Certoliz<br>umab<br>(every 4<br>week,<br>mainten<br>ance) | 168 | IBDQ, WPAI-<br>CD | Dimensions of IBDQ,<br>Mean (SD);<br>Total IBDQ score: 118.0<br>(28.6)<br>Bowel symptoms: 38.1<br>(8.8)<br>Systemic symptoms: 14.8<br>(5.2)<br>Emotional function: 45.9<br>(12.4)<br>Social function: 19.3 (7.6)<br><br>WPAI:CD scores, Mean<br>(SD)<br>Absenteeism, n= 80: 22.7<br>(33.3)<br>Presenteeism, n= 79: 42.9<br>(23.3)<br>Overall work impairment,<br>n= 71: 46.2 (26.2)<br>Daily activity impairment,<br>n= 167: 64.2 (24.6) | Dimensions of IBDQ, Mean (SD);<br>Total IBDQ score<br>Week 6, n= 166: 163.9 (31.0)<br>Week 16, n= 120: 159.4 (31.8)<br>Week 26, n= 75: 167.8 (34.5)<br>Bowel symptoms<br>Week 6, n= 166: 53.0 (8.7)<br>Week 16, n= 120: 50.7 (10.5)<br>Week 26, n= 75: 53.9 (11.3)<br>Systemic symptoms<br>Week 6, n= 166: 22.8 (5.5)<br>Week 16, n= 120: 21.9 (5.6)<br>Week 26, n= 75: 23.9 (5.8)<br>Emotional function<br>Week 6, n= 166: 60.7 (13.6)<br>Week 16, n= 120: 59.9 (13.1)<br>Week 26, n= 75: 61.8 (14.2)<br>Social function<br>Week 6, n= 166: 27.4 (6.9)<br>Week 16, n= 120: 26.9 (7.2)<br>Week 26, n= 75: 28.2 (6.9)<br>WPAI:CD scores, Mean (SD);<br>Absenteeism<br>Week 6, n= 87: 11.2 (26.7)<br>Week 16, n= 60: 9.6 (22.6)<br>Week 26, n= 32: 12.4 (26.6)<br>Presenteeism<br>Week 6, n= 84: 25.5 (22.9)<br>Week 16, n= 61: 27.4 (24.6)<br>Week 26, n= 36: 26.4 (25.1)<br>Overall work impairment<br>Week 6, n= 82: 27.6 (24.4)<br>Week 16, n= 58: 31.0 (26.2)<br>Week 26, n= 30: 30.3 (27.2)<br>Daily activity impairment<br>Week 6, n= 162: 35.4 (25.3) | Dimensions of IBDQ, Mean (SD);<br>Total IBDQ score<br>Week 6, n= 166: 45.4 (29.2)<br>Week 16, n= 120: 41.9 (33.3)<br>Week 26, n= 75: 47.3 (32.5)<br>Bowel symptoms<br>Week 6, n= 166: 14.8 (9.6)<br>Week 16, n= 120: 12.8 (10.7)<br>Week 26, n= 75: 15.4 (10.2)<br>Systemic symptoms<br>Week 6, n= 166: 8.0 (5.6)<br>Week 16, n= 120: 7.2 (6.3)<br>Week 26, n= 75: 8.8 (6.6)<br>Emotional function<br>Week 6, n= 166: 14.7 (11.9)<br>Week 16, n= 120: 14.0 (13.4)<br>Week 26, n= 75: 14.7 (13.1)<br>Social function<br>Week 6, n= 166: 8.0 (6.6)<br>Week 16, n= 120: 7.9 (7.4)<br>Week 26, n= 75: 8.4 (6.9) |  |                                                                                                                         |



|                                        |                                              |                      |     |                 |    |                                                                                                                                                                                                                                                                                                                                                                                 |            |                                                                                                                            |
|----------------------------------------|----------------------------------------------|----------------------|-----|-----------------|----|---------------------------------------------------------------------------------------------------------------------------------------------------------------------------------------------------------------------------------------------------------------------------------------------------------------------------------------------------------------------------------|------------|----------------------------------------------------------------------------------------------------------------------------|
|                                        |                                              |                      |     |                 |    | Week 16, n= 117: 42.8 (28.0)<br>Week 26, n= 75: 35.5 (27.8)                                                                                                                                                                                                                                                                                                                     |            |                                                                                                                            |
| <b>Bano vic 2009 [102]</b>             | France                                       | Infliximab           | 22  | MADRS, MOS-SF36 | NR | MADRS, Mean (SD): 10.95 (9.47)<br>MOS-SF36;<br>PF Physical Functioning: 83.64 (19.89)<br>RP Role Physical: 59.09 (37.44)<br>BP Bodily Pain: 65.05 (28.87)<br>GH General Health: 41.59 (19.33)<br>VT Vitality: 38.41 (21.90)<br>SF Social Functioning: 60.80 (25.67)<br>RE Role Emotional: 60.61 (43.20)<br>MH Mental Health: 53.45 (25.37)<br>HT Health Transition: 3.13 (1.01) | NR         | MADRS, scale for depression assessment:<br>Montgomery and Asberg Depression Rating Scale<br>MOS-SF36: QOL assessment scale |
| <b>Bano vic 2009 [102]</b>             | France                                       | Conventional therapy | 29  | MADRS, MOS-SF36 | NR | MADRS, Mean (SD): 7.38 (6.55)<br>MOS-SF36;<br>PF Physical Functioning: 81.72 (20.06)<br>RP Role Physical: 66.38 (36.76)<br>BP Bodily Pain: 67.10 (23.19)<br>GH General Health: 51.62 (22.70)<br>VT Vitality: 46.21 (21.03)<br>SF Social Functioning: 67.67 (23.27)<br>RE Role Emotional: 66.67 (37.80)<br>MH Mental Health: 57.10 (21.64)<br>HT Health Transition: 2.78 (1.13)  | NR         | MADRS, scale for depression assessment:<br>Montgomery and Asberg Depression Rating Scale<br>MOS-SF36: QOL assessment scale |
| <b>GAIN Trial (Sandborn 2007) [85]</b> | Multinational (USA, Canada, Belgium, France) | Placebo              | 166 | IBDQ            | NR | Week 4: 139                                                                                                                                                                                                                                                                                                                                                                     | Week 4: 15 |                                                                                                                            |
| <b>GAIN Trial (Sandborn)</b>           | Multinational (USA, Canada,                  | Adalimumab           | 159 | IBDQ            | NR | Week 4: 150, $p < 0.001$                                                                                                                                                                                                                                                                                                                                                        | Week 4: 30 | Rate difference in IBDQ between the two groups at week 4 was 14.1                                                          |

| n                            | Belgium      |                |    |                                        |                                        |    | percentage points<br>(CI, 7.92 to 20.41).                                                                                                                                                                                                                                                                                                                         |
|------------------------------|--------------|----------------|----|----------------------------------------|----------------------------------------|----|-------------------------------------------------------------------------------------------------------------------------------------------------------------------------------------------------------------------------------------------------------------------------------------------------------------------------------------------------------------------|
| 2007<br>][85]                | ,<br>France) |                |    |                                        |                                        |    |                                                                                                                                                                                                                                                                                                                                                                   |
|                              |              |                |    |                                        | 5 Dimensions of IBDQ-36, Median (IQR); |    |                                                                                                                                                                                                                                                                                                                                                                   |
|                              |              |                |    |                                        | Digestive symptoms                     |    |                                                                                                                                                                                                                                                                                                                                                                   |
|                              |              |                |    |                                        | 12 months: 6.3 (6.0–6.6)               |    |                                                                                                                                                                                                                                                                                                                                                                   |
|                              |              |                |    |                                        | 24 months: 6.6 (6.1–6.8)               |    |                                                                                                                                                                                                                                                                                                                                                                   |
|                              |              |                |    |                                        | 36 months: 6.5 (6.3–6.8)               |    |                                                                                                                                                                                                                                                                                                                                                                   |
|                              |              |                |    |                                        | 48 months: 6.5 (6.4–6.8)               |    |                                                                                                                                                                                                                                                                                                                                                                   |
|                              |              |                |    |                                        | Systemic symptoms                      |    |                                                                                                                                                                                                                                                                                                                                                                   |
|                              |              |                |    |                                        | 12 months: 6.5 (6.0–7.0)               |    |                                                                                                                                                                                                                                                                                                                                                                   |
|                              |              |                |    |                                        | 24 months: 6.8 (6.2–7.0)               |    |                                                                                                                                                                                                                                                                                                                                                                   |
|                              |              |                |    |                                        | 36 months: 6.6 (6.1–7.0)               |    |                                                                                                                                                                                                                                                                                                                                                                   |
|                              |              |                |    |                                        | 48 months: 6.8 (6.4–7.0)               |    |                                                                                                                                                                                                                                                                                                                                                                   |
|                              |              |                |    | 5 Dimensions of IBDQ-36, Median (IQR); |                                        |    |                                                                                                                                                                                                                                                                                                                                                                   |
|                              |              |                |    | Digestive symptoms: 6.5 (5.6–6.7)      | Emotional affectation                  |    |                                                                                                                                                                                                                                                                                                                                                                   |
|                              |              |                |    | Systemic symptoms: 6.1 (5.5–6.7)       | 12 months: 6.4 (6.0–6.8)               |    |                                                                                                                                                                                                                                                                                                                                                                   |
|                              |              |                |    | Emotional affectation: 6.0 (5.4–6.7)   | 24 months: 6.4 (6.0–7.0)               |    |                                                                                                                                                                                                                                                                                                                                                                   |
|                              |              |                |    | Functional affectation: 6.0 (5.1–6.4)  | 36 months: 6.6 (6.3–7.0)               |    |                                                                                                                                                                                                                                                                                                                                                                   |
|                              |              |                |    | Social affectation: 6.0 (5.7–6.7)      | 48 months: 6.7 (6.6–7.0)               |    |                                                                                                                                                                                                                                                                                                                                                                   |
|                              |              |                |    | EuroQoI-5D                             | Functional affectation                 |    |                                                                                                                                                                                                                                                                                                                                                                   |
|                              |              |                |    | Preference value: 1.0 (0.8–1.0)        | 12 months: 6.1 (5.4–7.0)               |    |                                                                                                                                                                                                                                                                                                                                                                   |
|                              |              |                |    | Visual analog scale: 65 (60–80)        | 24 months: 6.2 (5.3–7.0)               |    |                                                                                                                                                                                                                                                                                                                                                                   |
|                              |              |                |    |                                        | 36 months: 6.5 (5.3–7.0)               |    |                                                                                                                                                                                                                                                                                                                                                                   |
|                              |              |                |    |                                        | 48 months: 6.1 (6.0–6.5)               |    |                                                                                                                                                                                                                                                                                                                                                                   |
|                              |              |                |    |                                        | Social affectation                     |    |                                                                                                                                                                                                                                                                                                                                                                   |
|                              |              |                |    |                                        | 12 months: 6.2 (6.0–7.0)               |    |                                                                                                                                                                                                                                                                                                                                                                   |
|                              |              |                |    |                                        | 24 months: 6.5 (6.0–7.0)               |    |                                                                                                                                                                                                                                                                                                                                                                   |
|                              |              |                |    |                                        | 36 months: 6.8 (5.9–7.0)               |    |                                                                                                                                                                                                                                                                                                                                                                   |
|                              |              |                |    |                                        | 48 months: 6.9 (6.8–7.0)               |    |                                                                                                                                                                                                                                                                                                                                                                   |
|                              |              |                |    |                                        | EuroQoI-5D, Median (IQR);              |    |                                                                                                                                                                                                                                                                                                                                                                   |
|                              |              |                |    |                                        | Preference value                       |    |                                                                                                                                                                                                                                                                                                                                                                   |
|                              |              |                |    |                                        | 12 months: 1.0 (1.0–1.0)               |    |                                                                                                                                                                                                                                                                                                                                                                   |
|                              |              |                |    |                                        | 24 months: 1.0 (1.0–1.0)               |    |                                                                                                                                                                                                                                                                                                                                                                   |
|                              |              |                |    |                                        | 36 months: 1.0 (0.9–1.0)               |    |                                                                                                                                                                                                                                                                                                                                                                   |
|                              |              |                |    |                                        | 48 months: 1.0 (0.8–1.0)               |    |                                                                                                                                                                                                                                                                                                                                                                   |
|                              |              |                |    |                                        | Visual analog scale                    |    |                                                                                                                                                                                                                                                                                                                                                                   |
|                              |              |                |    |                                        | 12 months: 70 (60–80)                  |    |                                                                                                                                                                                                                                                                                                                                                                   |
|                              |              |                |    |                                        | 24 months: 70 (60–80)                  |    |                                                                                                                                                                                                                                                                                                                                                                   |
|                              |              |                |    |                                        | 36 months: 70 (60–82)                  |    |                                                                                                                                                                                                                                                                                                                                                                   |
| Case<br>las<br>2007<br>][86] | Spain        | Inflixim<br>ab | 49 | IBDQ-36,<br>EuroQoI-5D                 |                                        | NR | As per IBDQ-36, at inclusion 49% of patients corresponded to good-excellent category and that proportion ranged from 54%-60% throughout the study.<br><br>According to EuroQoI-5D score, majority of patients reported having no problems on the mobility (96%), self-care (100%), usual activities (98%), and pain/discomfort (94%) dimensions during remission. |

48 months: 77 (60–90)

|                                                                       |                                                          |                                    |            |                                                        |                                                                                                                                                                                                                                                                                                                                                                                                                                                      |                                                                                                                                   |                                                                                                                                                                                                                                             |                                                                                                                                                                                                                                                                                                                                                                                                                                                                                         |
|-----------------------------------------------------------------------|----------------------------------------------------------|------------------------------------|------------|--------------------------------------------------------|------------------------------------------------------------------------------------------------------------------------------------------------------------------------------------------------------------------------------------------------------------------------------------------------------------------------------------------------------------------------------------------------------------------------------------------------------|-----------------------------------------------------------------------------------------------------------------------------------|---------------------------------------------------------------------------------------------------------------------------------------------------------------------------------------------------------------------------------------------|-----------------------------------------------------------------------------------------------------------------------------------------------------------------------------------------------------------------------------------------------------------------------------------------------------------------------------------------------------------------------------------------------------------------------------------------------------------------------------------------|
| <p><b>Sand<br/>s<br/>2007<br/>[87]</b></p>                            | <p>USA</p>                                               | <p>Placebo<br/>+Infliximab</p>     | <p>27</p>  | <p>Inflammatory Bowel Disease Questionnaire (IBDQ)</p> | <p>138.4</p>                                                                                                                                                                                                                                                                                                                                                                                                                                         | <p>The Subject Global Assessment scores:<br/>Week 6: 50.6 mm<br/>Week 10: 60.2 mm</p>                                             | <p>Mean increase in IBDQ score:<br/>Week 6: 9.1<br/>Week 10: 17.3</p>                                                                                                                                                                       | <p>HRQoL was assessed in weeks 0, 6, and 10 and as part of any early-discontinuation visits before week 10.</p>                                                                                                                                                                                                                                                                                                                                                                         |
| <p><b>Sand<br/>s<br/>2007<br/>[87]</b></p>                            | <p>USA</p>                                               | <p>Natalizumab+Infliximab</p>      | <p>52</p>  | <p>Inflammatory Bowel Disease Questionnaire (IBDQ)</p> | <p>133.1</p>                                                                                                                                                                                                                                                                                                                                                                                                                                         | <p>The Subject Global Assessment scores:<br/>Week 6: 62.3 mm, <math>p=0.018</math><br/>Week 10: 66.9 mm, <math>p=0.174</math></p> | <p>Mean increase in IBDQ score:<br/>Week 6: 12.3 <math>p=0.605</math><br/>Week 10: 18.7, <math>p=0.811</math></p>                                                                                                                           |                                                                                                                                                                                                                                                                                                                                                                                                                                                                                         |
| <p><b>ACCE<br/>NT I<br/>Trial<br/>(Rutgers<br/>2004<br/>)[68]</b></p> | <p>Multinational (North America, Europe, and Israel)</p> | <p>Placebo (Episodic strategy)</p> | <p>188</p> | <p>IBDQ<br/>SF-36 PCS<br/>SF-36 MCS</p>                | <p>IBDQ (N= 188)<br/>Median (IQR): 126 (110-114)<br/>(N= 335, all patients randomised as week 2 responders): 129, 130 (27)<br/>SF-36 PCS, Median, mean (SD)<br/>(N= 573, all randomised patients): 34, 34 (8)<br/>(N= 335, all patients randomised as week 2 responders): 34, 34 (8)<br/>SF-36 MCS, Median, mean (SD)<br/>(N= 573, all randomised patients): 38, 39 (11)<br/>(N= 335, all patients randomised as week 2 responders): 39, 39 (11)</p> | <p>NR</p>                                                                                                                         | <p>At week 10, (N= 107)<br/>IBDQ: 28.9<br/>SF-36 PCS: 4.9<br/>SF-36 MCS: 3.8<br/>At week 30, (N= 109)<br/>IBDQ: 14.0<br/>SF-36 PCS: 3.1<br/>SF-36 MCS: 2.9<br/>At week 54, (N= 108)<br/>IBDQ: 8.9<br/>SF-36 PCS: 2.5<br/>SF-36 MCS: 2.0</p> | <p>Data presented graphically. The improvement observed in average IBDQ was not significantly better (<math>p=0.208</math>) in the infliximab 5 mg/kg scheduled treatment strategy group but was significantly better in the infliximab 10 mg/kg (<math>p=0.001</math>) and combined scheduled treatment strategy groups (<math>p=0.008</math>) when compared with that of the episodic treatment strategy group. There was a significantly higher proportion of patients with IBDQ</p> |

|                                   |                                                   |                                         |     |                                |                                                                                                                                                                                                                                                                                                                                                                                                                                                            |    |                                                                                                                                                                                                                                                                                                                                                                                                                                                                                                                                                                                                                                                                                                       |                                                                                                                                                                                                                                                                                                                                                                                                                                                                                                                                                                                                                                                                                                                                                                 |
|-----------------------------------|---------------------------------------------------|-----------------------------------------|-----|--------------------------------|------------------------------------------------------------------------------------------------------------------------------------------------------------------------------------------------------------------------------------------------------------------------------------------------------------------------------------------------------------------------------------------------------------------------------------------------------------|----|-------------------------------------------------------------------------------------------------------------------------------------------------------------------------------------------------------------------------------------------------------------------------------------------------------------------------------------------------------------------------------------------------------------------------------------------------------------------------------------------------------------------------------------------------------------------------------------------------------------------------------------------------------------------------------------------------------|-----------------------------------------------------------------------------------------------------------------------------------------------------------------------------------------------------------------------------------------------------------------------------------------------------------------------------------------------------------------------------------------------------------------------------------------------------------------------------------------------------------------------------------------------------------------------------------------------------------------------------------------------------------------------------------------------------------------------------------------------------------------|
| ACCENT I Trial (Rutgers 2004)[68] | Multinational (North America, Europe, and Israel) | Infliximab 5 mg/kg (Scheduled strategy) | 192 | IBDQ<br>SF-36 PCS<br>SF-36 MCS | <p>IBDQ (N= 192)<br/>Median (IQR): 126 (109-146)<br/>(N= 335, all patients randomised as week 2 responders): 129, 130 (27)</p> <p>SF-36 PCS, Median, mean (SD)<br/>(N= 573, all randomised patients): 34, 34 (8)<br/>(N= 335, all patients randomised as week 2 responders): 34, 34 (8)</p> <p>SF-36 MCS, Median, mean (SD)<br/>(N= 573, all randomised patients): 38, 39 (11)<br/>(N= 335, all patients randomised as week 2 responders): 39, 39 (11)</p> | NR | <p>At week 10, (N= 220, combined maintenance groups)<br/>IBDQ: 37.8, <math>p &lt; 0.05</math> vs. episodic group<br/>SF-36 PCS: 8.6, <math>p &lt; 0.001</math> vs. episodic group<br/>SF-36 MCS: 6.5, <math>p \geq 0.05</math> vs. episodic group</p> <p>At week 30, (N= 107)<br/>IBDQ: 27.1, <math>p &lt; 0.05</math> vs. episodic group<br/>SF-36 PCS: 7.3, <math>p &lt; 0.01</math> vs. episodic group<br/>SF-36 MCS: 4.6, <math>p \geq 0.05</math> vs. episodic group</p> <p>At week 54, (N= 111)<br/>IBDQ: 22.1, <math>p &lt; 0.05</math> vs. episodic group<br/>SF-36 PCS: 6.1, <math>p &lt; 0.05</math> vs. episodic group<br/>SF-36 MCS: 5.1, <math>p \geq 0.05</math> vs. episodic group</p> | <p>scores exceeding 170 in the combined scheduled strategy group at weeks 14, 22, and 46 (<math>p = 0.028</math>, <math>p = 0.012</math>, and <math>p = 0.049</math>, respectively) than in the episodic strategy group.</p> <p>Data presented graphically. The improvement observed in average IBDQ was not significantly better (<math>p = 0.208</math>) in the infliximab 5 mg/kg scheduled treatment strategy group but was significantly better in the infliximab 10 mg/kg (<math>p = 0.001</math>) and combined scheduled treatment strategy groups (<math>p = 0.008</math>) when compared with that of the episodic treatment strategy group. There was a significantly higher proportion of patients with IBDQ scores exceeding 170 in the combined</p> |
|-----------------------------------|---------------------------------------------------|-----------------------------------------|-----|--------------------------------|------------------------------------------------------------------------------------------------------------------------------------------------------------------------------------------------------------------------------------------------------------------------------------------------------------------------------------------------------------------------------------------------------------------------------------------------------------|----|-------------------------------------------------------------------------------------------------------------------------------------------------------------------------------------------------------------------------------------------------------------------------------------------------------------------------------------------------------------------------------------------------------------------------------------------------------------------------------------------------------------------------------------------------------------------------------------------------------------------------------------------------------------------------------------------------------|-----------------------------------------------------------------------------------------------------------------------------------------------------------------------------------------------------------------------------------------------------------------------------------------------------------------------------------------------------------------------------------------------------------------------------------------------------------------------------------------------------------------------------------------------------------------------------------------------------------------------------------------------------------------------------------------------------------------------------------------------------------------|

|                                      |                                                   |                                          |     |                                |                                                                                                                                                                                                                                                                                                                                                                                                                                                      |    |                                                                                                                                                                                                                                                                                                                                                                                                                                                                                                                                                                                                                                                                                                  |                                                                                                                                                                                                                                                                                                                                                                                                                                                                                                                                                                                                                                                                                                                                                                                  |
|--------------------------------------|---------------------------------------------------|------------------------------------------|-----|--------------------------------|------------------------------------------------------------------------------------------------------------------------------------------------------------------------------------------------------------------------------------------------------------------------------------------------------------------------------------------------------------------------------------------------------------------------------------------------------|----|--------------------------------------------------------------------------------------------------------------------------------------------------------------------------------------------------------------------------------------------------------------------------------------------------------------------------------------------------------------------------------------------------------------------------------------------------------------------------------------------------------------------------------------------------------------------------------------------------------------------------------------------------------------------------------------------------|----------------------------------------------------------------------------------------------------------------------------------------------------------------------------------------------------------------------------------------------------------------------------------------------------------------------------------------------------------------------------------------------------------------------------------------------------------------------------------------------------------------------------------------------------------------------------------------------------------------------------------------------------------------------------------------------------------------------------------------------------------------------------------|
| ACCENT I Trial (Rutgeerts 2004) [68] | Multinational (North America, Europe, and Israel) | Infliximab 10 mg/kg (Scheduled strategy) | 193 | IBDQ<br>SF-36 PCS<br>SF-36 MCS | <p>IBDQ (N= 193)<br/>Median (IQR): 131 (109-152)<br/>(N= 335, all patients randomised as week 2 responders): 129, 130 (27)<br/>SF-36 PCS, Median, mean (SD)<br/>(N= 573, all randomised patients): 34, 34 (8)<br/>(N= 335, all patients randomised as week 2 responders): 34, 34 (8)<br/>SF-36 MCS, Median, mean (SD)<br/>(N= 573, all randomised patients): 38, 39 (11)<br/>(N= 335, all patients randomised as week 2 responders): 39, 39 (11)</p> | NR | <p>At week 10, (N= 220, combined maintenance groups)<br/>IBDQ: 37.8, <math>p &lt; 0.05</math> vs. episodic group<br/>SF-36 PCS: 8.6, <math>p &lt; 0.001</math> vs. episodic group<br/>SF-36 MCS: 6.5, <math>p \geq 0.05</math> vs. episodic group<br/>At week 30, (N= 111)<br/>IBDQ: 31.7, <math>p &lt; 0.01</math> vs. episodic group<br/>SF-36 PCS: 7.3, <math>p &lt; 0.05</math> vs. episodic group<br/>SF-36 MCS: 4.9, <math>p \geq 0.05</math> vs. episodic group<br/>At week 54, (N= 109)<br/>IBDQ: 30.2, <math>p &lt; 0.001</math> vs. episodic group<br/>SF-36 PCS: 7.2, <math>p &lt; 0.01</math> vs. episodic group<br/>SF-36 MCS: 5.8, <math>p &lt; 0.05</math> vs. episodic group</p> | <p>scheduled strategy group at weeks 14, 22, and 46 (<math>p=0.028</math>, <math>p=0.012</math>, and <math>p=0.049</math>, respectively) than in the episodic strategy group.</p> <p>Data presented graphically. The improvement observed in average IBDQ was not significantly better (<math>p=0.208</math>) in the infliximab 5 mg/kg scheduled treatment strategy group but was significantly better in the infliximab 10 mg/kg (<math>p=0.001</math>) and combined scheduled treatment strategy groups (<math>p=0.008</math>) when compared with that of the episodic treatment strategy group. There was a significantly higher proportion of patients with IBDQ scores exceeding 170 in the combined scheduled strategy group at weeks 14, 22, and 46 (<math>p=</math></p> |
|--------------------------------------|---------------------------------------------------|------------------------------------------|-----|--------------------------------|------------------------------------------------------------------------------------------------------------------------------------------------------------------------------------------------------------------------------------------------------------------------------------------------------------------------------------------------------------------------------------------------------------------------------------------------------|----|--------------------------------------------------------------------------------------------------------------------------------------------------------------------------------------------------------------------------------------------------------------------------------------------------------------------------------------------------------------------------------------------------------------------------------------------------------------------------------------------------------------------------------------------------------------------------------------------------------------------------------------------------------------------------------------------------|----------------------------------------------------------------------------------------------------------------------------------------------------------------------------------------------------------------------------------------------------------------------------------------------------------------------------------------------------------------------------------------------------------------------------------------------------------------------------------------------------------------------------------------------------------------------------------------------------------------------------------------------------------------------------------------------------------------------------------------------------------------------------------|

|                                          |                                                   |                        |                                                                                           |      |                                                                                                                     |                                      |  |                                                                                                                                                                                           |                                                                                       |
|------------------------------------------|---------------------------------------------------|------------------------|-------------------------------------------------------------------------------------------|------|---------------------------------------------------------------------------------------------------------------------|--------------------------------------|--|-------------------------------------------------------------------------------------------------------------------------------------------------------------------------------------------|---------------------------------------------------------------------------------------|
|                                          |                                                   |                        |                                                                                           |      |                                                                                                                     |                                      |  |                                                                                                                                                                                           | 0.028, $p=0.012$ , and $p=0.049$ , respectively) than in the episodic strategy group. |
| <b>ACCENT II Trial (Sands 2004) [69]</b> | Multinational (North America, Europe, and Israel) | Placebo maintenance    | Evaluate<br>N=99<br>(Responders at the time of randomisation)<br>(Total randomised N=143) | IBDQ | Median (IQR): 168 (145-193)                                                                                         | NR                                   |  | Median increase from baseline in IBDQ score<br>At week 30: 4<br>At week 54: 5                                                                                                             | Median (IQR) IBDQ score at baseline for overall non-responders (N=87): 161 (136-176)  |
| <b>ACCENT II Trial (Sands 2004) [69]</b> | Multinational (North America, Europe, and Israel) | Infliximab maintenance | Evaluate<br>N=96<br>(Responders at the time of randomisation)<br>(Total randomised N=139) | IBDQ | Median (IQR): 155 (135-187)                                                                                         | NR                                   |  | Median increase from baseline in IBDQ score<br>At week 30: 14, $p=0.002$ vs. placebo maintenance<br>At week 54: 10, $p=0.03$ vs. placebo maintenance                                      | Median (IQR) IBDQ score at baseline for overall non-responders (N=87): 161 (136-176)  |
| <b>Balko 2002 [103]</b>                  | The Netherlands                                   | Infliximab             | 23                                                                                        | IBDQ | Mean IBDQ: 117.5 (17.7)<br>Bowel: 39.1 (6.0)<br>Systemic: 14.8 (4.9)<br>Emotional: 47.5 (9.2)<br>Social: 16.1 (6.7) | Mean IBDQ (at 4 weeks): 168.7 (31.8) |  | The IBDQ in the active Crohn's disease group improved significantly 4 weeks after the single infusion from 117.5 (17.7) to 168.7 (31.8) ( $p < 0.0001$ , increase of 51.2; 95% confidence |                                                                                       |

|                            |                                          |                   |    |      |                                                                                                                       |                                                                                                                                                      |                                                                                                                                                                                                                                                                                                                                                                                                                                                                                                                                                                         |                                                                                                                                                          |
|----------------------------|------------------------------------------|-------------------|----|------|-----------------------------------------------------------------------------------------------------------------------|------------------------------------------------------------------------------------------------------------------------------------------------------|-------------------------------------------------------------------------------------------------------------------------------------------------------------------------------------------------------------------------------------------------------------------------------------------------------------------------------------------------------------------------------------------------------------------------------------------------------------------------------------------------------------------------------------------------------------------------|----------------------------------------------------------------------------------------------------------------------------------------------------------|
| <b>Balkm 2002 [103]</b>    | The Netherlands                          | Infliximab        | 33 | IBDQ | Mean IBDQ: 151.8 (33.9)<br>Bowel: 51.5 (10.7)<br>Systemic: 20.5 (6.0)<br>Emotional: 56.8 (14.3)<br>Social: 22.9 (8.0) | Mean IBDQ (at 2 weeks): 164.0 (29.2); (at 10 weeks): 179.6 (25.5)                                                                                    | interval (CI), 36.7–65.7). The percentage of improvement was higher in the active disease group than in the fistulising group: Total IBDQ (46% vs. 25%, respectively; $p < 0.05$ ), Bowel (43% vs. 19%, respectively; $p < 0.05$ ), Systemic (84% vs. 33%, respectively; $p < 0.01$ ), Social (84% vs. 33%, respectively; $p = 0.018$ ), Emotional (84% vs. 33%, respectively; $p < 0.05$ ),<br><br>In the fistulising group, the total IBDQ score improved 2 weeks after infusion from 151.8 (33.9) to 164.0 (29.2) $p = 0.002$ , increase of 12.2; 95% CI, 4.8–19.7). |                                                                                                                                                          |
| <b>Rutgeerts 1999 [77]</b> | Multinational (North America and Europe) | Infliximab        | 37 | IBDQ | NR                                                                                                                    | NR                                                                                                                                                   | NR                                                                                                                                                                                                                                                                                                                                                                                                                                                                                                                                                                      | Infliximab-retreatment demonstrated continued/improved suppression of disease activity at levels associated with disease remission.                      |
| <b>Rutgeerts 1999 [77]</b> | Multinational (North America and Europe) | Placebo           | 36 | IBDQ | NR                                                                                                                    | NR                                                                                                                                                   | NR                                                                                                                                                                                                                                                                                                                                                                                                                                                                                                                                                                      | Placebo-retreatment had a gradual loss of the initial treatment benefit throughout the study period, returning to values associated with active disease. |
| <b>Targan 1997 [91]</b>    | Multinational (North America and Europe) | Infliximab 5mg/kg | 27 | IBDQ | Mean (SD): 122 (29)<br>All Infliximab groups, n=83: 118 (27)                                                          | Mean (SD), $p$ value for change from baseline;<br>At week 4: 168 (36), $p < 0.0001$<br>All Infliximab groups, n=83, At week 4: 154 (38), $p = 0.001$ | 46                                                                                                                                                                                                                                                                                                                                                                                                                                                                                                                                                                      |                                                                                                                                                          |

|                            |                                          |                              |        |          |                                                              |                                                                                                                                                                                                                                                                 |                                                                                                                                                                                                                 |
|----------------------------|------------------------------------------|------------------------------|--------|----------|--------------------------------------------------------------|-----------------------------------------------------------------------------------------------------------------------------------------------------------------------------------------------------------------------------------------------------------------|-----------------------------------------------------------------------------------------------------------------------------------------------------------------------------------------------------------------|
| <b>Targan 1997 [91]</b>    | Multinational (North America and Europe) | Infliximab 10mg/kg           | 28     | IBDQ     | Mean (SD): 116 (23)<br>All Infliximab groups, n=83: 118 (27) | Mean (SD), p value for change from baseline;<br>At week 4: 146 (41), $p=0.002$<br>All Infliximab groups, n=83, At week 4: 154 (39), $p=0.001$                                                                                                                   | 30                                                                                                                                                                                                              |
| <b>Targan 1997 [91]</b>    | Multinational (North America and Europe) | Infliximab 20mg/kg           | 28     | IBDQ     | Mean (SD): 118 (28)<br>All Infliximab groups, n=83: 118 (27) | Mean (SD), p value for change from baseline;<br>At week 4: 149 (35), $p=0.03$<br>All Infliximab groups, n=83, At week 4: 154 (40), $p=0.001$                                                                                                                    | 32                                                                                                                                                                                                              |
| <b>Targan 1997 [91]</b>    | Multinational (North America and Europe) | Placebo                      | 25     | IBDQ     | Mean (SD): 128 (29)                                          | Mean (SD), At week 4: 133 (28)<br>5, $p=0.001$ compared to the overall Infliximab group                                                                                                                                                                         |                                                                                                                                                                                                                 |
| <b>Casellas 2012 [101]</b> | Spain                                    | Infliximab/adalimumab: 17/26 | CD: 43 | IBDQ- 36 | Median (IQR)<br>Global IBDQ score: 201.6 (180.9-232.2)       | Median (IQR)<br>Global IBDQ score: 228.0 (206.0–240.0)<br>Digestive symptoms: 52.0. (45.6–54.4)<br>Systemic symptoms: 42.0 (37.8–44.8)<br>Emotional symptoms: 50.4 (45.6–54.4)<br>Functional symptoms: 44.8 (39.9–47.6)<br>Social affectation 39.6: (36.0–40.2) | Normalisation of HRQOL was achieved in all 11 UC patients and in 29 out of 43 CD patients (67%). In our sample population, restoration of health was significantly more frequent in UC than in CD ( $p<0.05$ ). |



## Section 6. Identified studies

Abraham NS, Richardson P, Castillo D, Kane SV. Dual therapy with infliximab and immunomodulator reduces one-year rates of hospitalization and surgery among veterans with inflammatory bowel disease. *Clin Gastroenterol Hepatol*. 2013;11(10):1281-7.

Afif W, Leighton JA, Hanauer SB, Loftus EV, Jr., Faubion WA, Pardi DS, et al. Open-label study of adalimumab in patients with ulcerative colitis including those with prior loss of response or intolerance to infliximab. *Inflamm Bowel Dis*. 2009;15(9):1302-7.

Afif W, Loftus EV, Jr., Faubion WA, Kane SV, Bruining DH, Hanson KA, et al. Clinical utility of measuring infliximab and human anti-chimeric antibody concentrations in patients with inflammatory bowel disease. *Am J Gastroenterol*. 2010;105(5):1133-9.

Allez M, Vermeire S, Mozziconacci N, Michetti P, Laharie D, Louis E, et al. The efficacy and safety of a third anti-TNF monoclonal antibody in Crohn's disease after failure of two other anti-TNF antibodies. *Aliment Pharmacol Ther*. 2010;31(1):92-101.

Alzafiri R, Holcroft CA, Malolepszy P, Cohen A, Szilagyi A. Infliximab therapy for moderately severe Crohn's disease and ulcerative colitis: a retrospective comparison over 6 years. *Clin Exp Gastroenterol*. 2011;4.

Ananthakrishnan AN, Hur C, Korzenik JR. Certolizumab pegol compared to natalizumab in patients with moderate to severe Crohn's disease: results of a decision analysis. *Dig Dis Sci*. 2012;57(2):472-80.

Ananthakrishnan AN, Issa M, Beaulieu DB, Skaros S, Knox JF, Lemke K, et al. History of medical hospitalization predicts future need for colectomy in patients with ulcerative colitis. *Inflamm Bowel Dis*. 2009;15(2):176-81.

Aratari A, Papi C, Clemente V, Moretti A, Luchetti R, Koch M, et al. Colectomy rate in acute severe ulcerative colitis in the infliximab era. *Dig Liver Dis*. 2008;40(10):821-6.

Arnott ID, McDonald D, Williams A, Ghosh S. Clinical use of Infliximab in Crohn's disease: the Edinburgh experience. *Aliment Pharmacol Ther*. 2001;15(10):1639-46.

Bailey R, Waters H, Ernst F, Johnson B, McKenzie S. Infliximab dosing and administration patterns in patients with Crohn's disease in a hospital outpatient setting *Am J Pharm Benefits*. 2011;3(6):e121-6.

Banovic I, Gilibert D, Cosnes J. Perception of improved state of health and subjective quality of life in Crohn's disease patients treated with Infliximab. *J Crohns Colitis*. 2009;3(1):25-31.

Barreiro-de-Acosta M, Lorenzo A, Dominguez-Munoz JE. Efficacy of adalimumab for the treatment of extraintestinal manifestations of Crohn's disease. *Rev Esp Enferm Dig*. 2012;104(9):468-72.

Bernstein CN, Longobardi T, Finlayson G, Blanchard JF. Direct medical cost of managing IBD patients: a Canadian population-based study. *Inflamm Bowel Dis*. 2012;18(8):1498-508.

Bhalme M, Sharma A, Keld R, Willert R, Campbell S. Does weight-adjusted anti-tumour necrosis factor treatment favour obese patients with Crohn's disease? *Eur J Gastroenterol Hepatol*. 2013;25(5):543-9.

Billioud V, Laharie D, Filippi J, Roblin X, Oussalah A, Chevaux JB, et al. Adherence to adalimumab therapy in Crohn's disease: a French multicenter experience. *Inflamm Bowel Dis*. 2011;17(1):152-9.

Blumenstein I, Bock H, Weber C, Rambow A, Tacke W, Kihn R, et al. Health care and cost of medication for inflammatory bowel disease in the Rhein-Main region, Germany: a multicenter, prospective, internet-based study. *Inflamm Bowel Dis*. 2008;14(1):53-60.

Bultman E, de Haar C, van Liere-Baron A, Verhoog H, West RL, Kuipers EJ, et al. Predictors of dose escalation of adalimumab in a prospective cohort of Crohn's disease patients. *Aliment Pharmacol Ther*. 2012;35(3):335-41.

Carter CT, Leher H, Smith P, Smith DB, Waters HC. Impact of persistence with infliximab on hospitalizations in ulcerative colitis. *Am J Manag Care*. 2011;17(6):385-92.

Carter CT, Waters HC, Smith DB. Impact of infliximab adherence on Crohn's disease-related healthcare utilization and inpatient costs. *Adv Ther*. 2011;28(8):671-83.

Casellas F, Robles V, Borruel N, Torrejon A, Castells I, Navarro E, et al. Restoration of quality of life of patients with inflammatory bowel disease after one year with antiTNFalpha treatment. *J Crohns Colitis*. 2012;6(9):881-6.

Casellas F, Rodrigo L, Nino P, Pantiga C, Riestra S, Malagelada JR. Sustained improvement of health-related quality of life in Crohn's disease patients treated with infliximab and azathioprine for 4 years. *Inflamm Bowel Dis*. 2007;13(11):1395-400.

Chaparro M, Andreu M, Barreiro-de Acosta M, Garcia-Planella E, Ricart E, Domenech E, et al. Effectiveness of infliximab after adalimumab failure in Crohn's disease. *World J Gastroenterol*. 2012;18(37):5219-24.

Chaparro M, Burgueno P, Iglesias E, Panes J, Munoz F, Bastida G, et al. Infliximab salvage therapy after failure of ciclosporin in corticosteroid-refractory ulcerative colitis: a multicentre study. *Aliment Pharmacol Ther*. 2012;35(2):275-83.

Chaparro M, Martinez-Montiel P, Van Domselaar M, Bermejo F, Perez-Calle JL, Casis B, et al. Intensification of infliximab therapy in Crohn's disease: efficacy and safety. *J Crohns Colitis*. 2012;6(1):62-7.

Chaparro M, Panes J, Garcia V, Manosa M, Esteve M, Merino O, et al. Long-term durability of infliximab treatment in Crohn's disease and efficacy of dose "escalation" in patients losing response. *J Clin Gastroenterol*. 2011;45(2):113-8.

Chaparro M, Panes J, Garcia V, Merino O, Nos P, Domenech E, et al. Long-term durability of response to adalimumab in Crohn's disease. *Inflamm Bowel Dis*. 2012;18(4):685-90.

Cohen RD, Lewis JR, Turner H, Harrell LE, Hanauer SB, Rubin DT. Predictors of adalimumab dose escalation in patients with Crohn's disease at a tertiary referral center. *Inflamm Bowel Dis*. 2012;18(1):10-6.

Colombel JF, Sandborn WJ, Rutgeerts P, Kamm MA, Yu AP, Wu EQ, et al. Comparison of two adalimumab treatment schedule strategies for moderate-to-severe Crohn's disease: results from the CHARM trial. *Am J Gastroenterol*. 2009;104(5):1170-9.

Cordero Ruiz P, Castro Marquez C, Mendez Rufian V, Castro Laria L, Caunedo Alvarez A, Romero Vazquez J, et al. Efficacy of adalimumab in patients with Crohn's disease and failure to infliximab therapy: a clinical series. *Rev Esp Enferm Dig*. 2011;103(6):294-8.

Cottone M, Kohn A, Daperno M, Armuzzi A, Guidi L, D'Inca R, et al. Advanced age is an independent risk factor for severe infections and mortality in patients given anti-tumor necrosis factor therapy for inflammatory bowel disease. *Clin Gastroenterol Hepatol*. 2011;9(1):30-5.

de la Poza G, Lopez-Sanroman A, Taxonera C, Marin-Jimenez I, Gisbert JP, Bermejo F, et al. Genital fistulas in female Crohn's disease patients.: clinical characteristics and response to therapy. *J Crohns Colitis*. 2012;6(3):276-80.

de Silva PS, Nguyen DD, Sauk J, Korzenik J, Yajnik V, Ananthakrishnan AN. Long-term outcome of a third anti-TNF monoclonal antibody after the failure of two prior anti-TNFs in inflammatory bowel disease. *Aliment Pharmacol Ther*. 2012;36(5):459-66.

de Vries HS, van Oijen MG, de Jong DJ. Serious events with infliximab in patients with inflammatory bowel disease: a 9-year cohort study in the Netherlands. *Drug Saf*. 2008;31(12):1135-44.

Deepak P, Stobaugh DJ, Ehrenpreis ED. Infectious complications of TNF-alpha inhibitor monotherapy versus combination therapy with immunomodulators in inflammatory bowel disease: analysis of the Food and Drug Administration Adverse Event Reporting System. *J Gastrointest Liver Dis*. 2013;22(3):269-76.

Desai A, Zator ZA, de Silva P, Nguyen DD, Korzenik J, Yajnik V, et al. Older age is associated with higher rate of discontinuation of anti-TNF therapy in patients with inflammatory bowel disease. *Inflamm Bowel Dis*. 2013;19(2):309-15.

Echarri A, Castro J, Barreiro M, Carpio D, Pereira S, Lorenzo A. Evaluation of adalimumab therapy in multidisciplinary strategy for perianal Crohn's disease patients with infliximab failure. *J Crohns Colitis*. 2010;4(6):654-60.

Fortea-Ormaechea JI, Gonzalez-Lama Y, Casis B, Chaparro M, Lopez Serrano P, Van Domselaar M, et al. Adalimumab is effective in long-term real life clinical practice in both luminal and perianal Crohn's disease. The Madrid experience. *Gastroenterol Hepatol*. 2011;34(7):443-8.

Ghazi LJ, Patil SA, Rustgi A, Flasar MH, Razeghi S, Cross RK. Step up versus early biologic therapy for Crohn's disease in clinical practice. *Inflamm Bowel Dis*. 2013;19(7):1397-403.

Gies N, Kroeker KI, Wong K, Fedorak RN. Treatment of ulcerative colitis with adalimumab or infliximab: long-term follow-up of a single-centre cohort. *Aliment Pharmacol Ther*. 2010;32(4):522-8.

Gornet JM, Couve S, Hassani Z, Delchier JC, Marteau P, Cosnes J, et al. Infliximab for refractory ulcerative colitis or indeterminate colitis: an open-label multicentre study. *Aliment Pharmacol Ther*. 2003;18(2):175-81.

Gu J, Remzi FH, Shen B, Vogel JD, Kiran RP. Operative strategy modifies risk of pouch-related outcomes in patients with ulcerative colitis on preoperative anti-tumor necrosis factor-alpha therapy. *Dis Colon Rectum*. 2013;56(11):1243-52.

Hamzaoglu H, Cooper J, Alsaahli M, Falchuk KR, Peppercorn MA, Farrell RJ. Safety of infliximab in Crohn's disease: a large single-center experience. *Inflamm Bowel Dis*. 2010;16(12):2109-16.

Haveran LA, Sehgal R, Poritz LS, McKenna KJ, Stewart DB, Koltun WA. Infliximab and/or azathioprine in the treatment of Crohn's disease-like complications after IPAA. *Dis Colon Rectum*. 2011;54(1):15-20.

Herrlinger KR, Barthel DN, Schmidt KJ, Buning J, Barthel CS, Wehkamp J, et al. Infliximab as rescue medication for patients with severe ulcerative/indeterminate colitis refractory to tacrolimus. *Aliment Pharmacol Ther.* 2010;31(9):1036-41.

Ho GT, Lee HM, Brydon G, Ting T, Hare N, Drummond H, et al. Fecal calprotectin predicts the clinical course of acute severe ulcerative colitis. *Am J Gastroenterol.* 2009;104(3):673-8.

Ho GT, Mowat A, Potts L, Cahill A, Mowat C, Lees CW, et al. Efficacy and complications of adalimumab treatment for medically-refractory Crohn's disease: analysis of nationwide experience in Scotland (2004-2008). *Aliment Pharmacol Ther.* 2009;29(5):527-34.

Ho GT, Smith L, Aitken S, Lee HM, Ting T, Fennell J, et al. The use of adalimumab in the management of refractory Crohn's disease. *Aliment Pharmacol Ther.* 2008;27(4):308-15.

Jewell DP, Satsangi J, Lobo A, Probert C, Forbes A, Ghosh S, et al. Infliximab use in Crohn's disease: impact on health care resources in the UK. *Eur J Gastroenterol Hepatol.* 2005;17(10):1047-52.

Jurgens M, Laubender RP, Hartl F, Weidinger M, Seiderer J, Wagner J, et al. Disease activity, ANCA, and IL23R genotype status determine early response to infliximab in patients with ulcerative colitis. *Am J Gastroenterol.* 2010;105(8):1811-9.

Kane SV, Chao J, Mulani PM. Adherence to infliximab maintenance therapy and health care utilization and costs by Crohn's disease patients. *Adv Ther.* 2009;26(10):936-46.

Kaplan GG, Hur C, Korzenik J, Sands BE. Infliximab dose escalation vs. initiation of adalimumab for loss of response in Crohn's disease: a cost-effectiveness analysis. *Aliment Pharmacol Ther.* 2007;26(11-12):1509-20.

Katz L, Gisbert JP, Manoogian B, Lin K, Steenholdt C, Mantzaris GJ, et al. Doubling the infliximab dose versus halving the infusion intervals in Crohn's disease patients with loss of response. *Inflamm Bowel Dis.* 2012;18(11):2026-33.

Kopylov U, Mantzaris GJ, Katsanos KH, Reenaers C, Ellul P, Rahier JF, et al. The efficacy of shortening the dosing interval to once every six weeks in Crohn's patients losing response to maintenance dose of infliximab. *Aliment Pharmacol Ther.* 2011;33(3):349-57.

Laharie D, Bourreille A, Branche J, Allez M, Bouhnik Y, Filippi J, et al. Ciclosporin versus infliximab in patients with severe ulcerative colitis refractory to intravenous steroids: a parallel, open-label randomised controlled trial. *Lancet.* 2012;380(9857):1909-15.

Laharie D, Reffet A, Belleannee G, Chabrun E, Subtil C, Razaire S, et al. Mucosal healing with methotrexate in Crohn's disease: a prospective comparative study with azathioprine and infliximab. *Aliment Pharmacol Ther.* 2011;33(6):714-21.

Lees CW, Ali AI, Thompson AI, Ho GT, Forsythe RO, Marquez L, et al. The safety profile of anti-tumour necrosis factor therapy in inflammatory bowel disease in clinical practice: analysis of 620 patient-years follow-up. *Aliment Pharmacol Ther.* 2009;29(3):286-97.

Lemann M, Mary JY, Duclos B, Veyrac M, Dupas JL, Delchier JC, et al. Infliximab plus azathioprine for steroid-dependent Crohn's disease patients: a randomized placebo-controlled trial. *Gastroenterology.* 2006;130(4):1054-61.

Leombruno JP, Nguyen GC, Grootendorst P, Juurlink D, Einarson T. Hospitalization and surgical rates in patients with Crohn's disease treated with infliximab: a matched analysis. *Pharmacoepidemiol Drug Saf.* 2011;20(8):838-48.

Lichtenstein GR, Feagan BG, Cohen RD, Salzberg BA, Diamond RH, Price S, et al. Serious infection and mortality in patients with Crohn's disease: more than 5 years of follow-up in the TREAT registry. *Am J Gastroenterol.* 2012;107(9):1409-22.

Lichtiger S, Binion DG, Wolf DC, Present DH, Bensimon AG, Wu E, et al. The CHOICE trial: adalimumab demonstrates safety, fistula healing, improved quality of life and increased work productivity in patients with Crohn's disease who failed prior infliximab therapy. *Aliment Pharmacol Ther.* 2010;32(10):1228-39.

Lindsay JO, Chipperfield R, Giles A, Wheeler C, Orchard T. A UK retrospective observational study of clinical outcomes and healthcare resource utilisation of infliximab treatment in Crohn's disease. *Aliment Pharmacol Ther.* 2013;38(1):52-61.

Loomes DE, Teshima C, Jacobs P, Fedorak RN. Health care resource use and costs in Crohn's disease before and after infliximab therapy. *Can J Gastroenterol.* 2011;25(9):497-502.

Louis E, Lofberg R, Reinisch W, Camez A, Yang M, Pollack PF, et al. Adalimumab improves patient-reported outcomes and reduces indirect costs in patients with moderate to severe Crohn's disease: results from the CARE trial. *J Crohns Colitis.* 2013;7(1):34-43.

Lu C, Waugh A, Bailey RJ, Cherry R, Dieleman LA, Gramlich L, et al. Crohn's disease genotypes of patients in remission vs relapses after infliximab discontinuation. *World J Gastroenterol.* 2012;18(36):5058-64.

Maser EA, Deconda D, Lichtiger S, Ullman T, Present DH, Kornbluth A. Cyclosporine and infliximab as rescue therapy for each other in patients with steroid-refractory ulcerative colitis. *Clin Gastroenterol Hepatol.* 2008;6(10):1112-6.

Mocciaro F, Renna S, Orlando A, Rizzuto G, Sinagra E, Orlando E, et al. Cyclosporine or infliximab as rescue therapy in severe refractory ulcerative colitis: early and long-term data from a retrospective observational study. *J Crohns Colitis.* 2012;6(6):681-6.

Nguyen GC, LaVeist TA, Harris ML, Wang MH, Datta LW, Brant SR. Racial disparities in utilization of specialist care and medications in inflammatory bowel disease. *Am J Gastroenterol.* 2010;105(10):2202-8.

Nugent Z, Blanchard JF, Bernstein CN. A population-based study of health-care resource use among infliximab users. *Am J Gastroenterol.* 2010;105(9):2009-16.

Ollendorf DA, Lidsky L. Infliximab drug and infusion costs among patients with Crohn's disease in a commercially-insured setting. *Am J Ther.* 2006;13(6):502-6.

Osterman MT, Haynes K, Delzell E, Zhang J, Bewtra M, Brensinger C, et al. Comparative effectiveness of infliximab and adalimumab for Crohn's disease. *Clin Gastroenterol Hepatol.* 2014;12(5):811-7.e3.

Oussalah A, Chevaux JB, Fay R, Sandborn WJ, Bigard MA, Peyrin-Biroulet L. Predictors of infliximab failure after azathioprine withdrawal in Crohn's disease treated with combination therapy. *Am J Gastroenterol.* 2010;105(5):1142-9.

Oussalah A, Evesque L, Laharie D, Roblin X, Boschetti G, Nancey S, et al. A multicenter experience with infliximab for ulcerative colitis: outcomes and predictors of response, optimization, colectomy, and hospitalization. *Am J Gastroenterol*. 2010;105(12):2617-25.

Oussalah A, Laclotte C, Chevaux JB, Bensenane M, Babouri A, Serre AA, et al. Long-term outcome of adalimumab therapy for ulcerative colitis with intolerance or lost response to infliximab: a single-centre experience. *Aliment Pharmacol Ther*. 2008;28(8):966-72.

Panaccione R, Colombel JF, Sandborn WJ, Rutgeerts P, D'Haens GR, Robinson AM, et al. Adalimumab sustains clinical remission and overall clinical benefit after 2 years of therapy for Crohn's disease. *Aliment Pharmacol Ther*. 2010;31(12):1296-309.

Panaccione R, Loftus EV, Jr., Binion D, McHugh K, Alam S, Chen N, et al. Efficacy and safety of adalimumab in Canadian patients with moderate to severe Crohn's disease: results of the Adalimumab in Canadian SubjeCts with ModERate to Severe Crohn's DiseaSe (ACCESS) trial. *Can J Gastroenterol*. 2011;25(8):419-25.

Pariante B, Pineton de Chambrun G, Krzysiek R, Desroches M, Louis G, De Cassan C, et al. Trough levels and antibodies to infliximab may not predict response to intensification of infliximab therapy in patients with inflammatory bowel disease. *Inflamm Bowel Dis*. 2012;18(7):1199-206.

Patil SA, Rustgi A, Langenberg P, Cross RK. Comparative Effectiveness of Anti-TNF Agents for Crohn's Disease in a Tertiary Referral IBD Practice. *Dig Dis Sci*. 2013;58(1):209-15.

Pearce CB, Lawrance IC. Careful patient selection may improve response rates to infliximab in inflammatory bowel disease. *J Gastroenterol Hepatol*. 2007;22(10):1671-7.

Peyrin-Biroulet L, Laclotte C, Bigard MA. Adalimumab maintenance therapy for Crohn's disease with intolerance or lost response to infliximab: an open-label study. *Aliment Pharmacol Ther*. 2007;25(6):675-80.

Probert CS, Hearing SD, Schreiber S, Kuhbacher T, Ghosh S, Arnott ID, et al. Infliximab in moderately severe glucocorticoid resistant ulcerative colitis: a randomised controlled trial. *Gut*. 2003;52(7):998-1002.

Reenaers C, Louis E, Belaiche J, Seidel L, Keshav S, Travis S. Does co-treatment with immunosuppressors improve outcome in patients with Crohn's disease treated with adalimumab? *Aliment Pharmacol Ther*. 2012;36(11-12):1040-8.

Regueiro M, Curtis J, Plevy S. Infliximab for hospitalized patients with severe ulcerative colitis. *J Clin Gastroenterol*. 2006;40(6):476-81.

Rodrigo L, Perez-Pariante JM, Fuentes D, Cadahia V, Garcia-Carbonero A, Nino P, et al. Retreatment and maintenance therapy with infliximab in fistulizing Crohn's disease. *Rev Esp Enferm Dig*. 2004;96(8):548-54; 54-8.

Rostholder E, Ahmed A, Cheifetz AS, Moss AC. Outcomes after escalation of infliximab therapy in ambulatory patients with moderately active ulcerative colitis. *Aliment Pharmacol Ther*. 2012;35(5):562-7.

Russo EA, Iacucci M, Lindsay JO, Campbell S, Hart A, Hamlin J, et al. Survey on the use of adalimumab as maintenance therapy in Crohn's disease in England and Ireland. *Eur J Gastroenterol Hepatol*. 2010;22(3):334-9.

Rutgeerts P, D'Haens G, Targan S, Vasiliauskas E, Hanauer SB, Present DH, et al. Efficacy and safety of retreatment with anti-tumor necrosis factor antibody (infliximab) to maintain remission in Crohn's disease. *Gastroenterology*. 1999;117(4):761-9.

Rutgeerts P, Feagan BG, Lichtenstein GR, Mayer LF, Schreiber S, Colombel JF, et al. Comparison of scheduled and episodic treatment strategies of infliximab in Crohn's disease. *Gastroenterology*. 2004;126(2):402-13.

Rutgeerts P, Sandborn WJ, Fedorak RN, Rachmilewitz D, Tarabar D, Gibson P, et al. Onercept for moderate-to-severe Crohn's disease: a randomized, double-blind, placebo-controlled trial. *Clin Gastroenterol Hepatol*. 2006;4(7):888-93.

Sakuraba A, Keyashian K, Correia C, Melek J, Cohen RD, Hanauer SB, et al. Natalizumab in Crohn's disease: results from a US tertiary inflammatory bowel disease center. *Inflamm Bowel Dis*. 2013;19(3):621-6.

Sandborn WJ, Abreu MT, D'Haens G, Colombel JF, Vermeire S, Mitchev K, et al. Certolizumab pegol in patients with moderate to severe Crohn's disease and secondary failure to infliximab. *Clin Gastroenterol Hepatol*. 2010;8(8):688-95.e2.

Sandborn WJ, Colombel JF, D'Haens G, Van Assche G, Wolf D, Kron M, et al. One-year maintenance outcomes among patients with moderately-to-severely active ulcerative colitis who responded to induction therapy with adalimumab: subgroup analyses from ULTRA 2. *Aliment Pharmacol Ther*. 2013;37(2):204-13.

Sandborn WJ, Rutgeerts P, Enns R, Hanauer SB, Colombel JF, Panaccione R, et al. Adalimumab induction therapy for Crohn disease previously treated with infliximab: a randomized trial. *Ann Intern Med*. 2007;146(12):829-38.

Sandborn WJ, Rutgeerts P, Feagan BG, Reinisch W, Olson A, Johanns J, et al. Colectomy rate comparison after treatment of ulcerative colitis with placebo or infliximab. *Gastroenterology*. 2009;137(4):1250-60; quiz 520.

Sands BE, Anderson FH, Bernstein CN, Chey WY, Feagan BG, Fedorak RN, et al. Infliximab Maintenance Therapy for Fistulizing Crohn's Disease. *N Engl J Med*. 2004;350(9):876-85.

Sands BE, Kozarek R, Spainhour J, Barish CF, Becker S, Goldberg L, et al. Safety and tolerability of concurrent natalizumab treatment for patients with Crohn's disease not in remission while receiving infliximab. *Inflamm Bowel Dis*. 2007;13(1):2-11.

Saro C, da la Coba C, Casado MA, Morales JM, Otero B. Resource use in patients with Crohn's disease treated with infliximab. *Aliment Pharmacol Ther*. 2007;26(10):1313-23.

Schluender SJ, Ippoliti A, Dubinsky M, Vasiliauskas EA, Papadakis KA, Mei L, et al. Does infliximab influence surgical morbidity of ileal pouch-anal anastomosis in patients with ulcerative colitis? *Dis Colon Rectum*. 2007;50(11):1747-53.

Schneeweiss S, Korzenik J, Solomon DH, Canning C, Lee J, Bressler B. Infliximab and other immunomodulating drugs in patients with inflammatory bowel disease and the risk of serious bacterial infections. *Aliment Pharmacol Ther*. 2009;30(3):253-64.

Seminario JL, Loftus EV, Jr., Colombel JF, Thapa P, Sandborn WJ. Infliximab for Crohn's disease: the first 500 patients followed up through 2009. *Dig Dis Sci*. 2013;58(3):797-806.

Sprakes MB, Ford AC, Soares NC, Warren L, Greer D, Donnellan CF, et al. Costs of care for Crohn's disease following the introduction of infliximab: a single-centre UK experience. *Aliment Pharmacol Ther.* 2010;32(11-12):1357-63.

Sprakes MB, Ford AC, Warren L, Greer D, Hamlin J. Efficacy, tolerability, and predictors of response to infliximab therapy for Crohn's disease: a large single centre experience. *J Crohns Colitis.* 2012;6(2):143-53.

Sprakes MB, Hamlin PJ, Warren L, Greer D, Ford AC. Adalimumab as second line anti-tumour necrosis factor alpha therapy for Crohn's disease: A single centre experience. *J Crohns Colitis.* 2011;5(4):324-31.

Steenholdt C, Palarasah Y, Bendtzen K, Teisner A, Brynskov J, Teisner B, et al. Pre-existing IgG antibodies cross-reacting with the Fab region of infliximab predict efficacy and safety of infliximab therapy in inflammatory bowel disease. *Aliment Pharmacol Ther.* 2013;37(12):1172-83.

Stein DJ, Ananthakrishnan AN, Issa M, Williams JB, Beaulieu DB, Zadvornova Y, et al. Impact of prior irregular infliximab dosing on performance of long-term infliximab maintenance therapy in Crohn's disease. *Inflamm Bowel Dis.* 2010;16(7):1173-9.

Su C, Salzberg BA, Lewis JD, Deren JJ, Kornbluth A, Katzka DA, et al. Efficacy of anti-tumor necrosis factor therapy in patients with ulcerative colitis. *Am J Gastroenterol.* 2002;97(10):2577-84.

Sussman DA, Kubiliun N, Mulani PM, Chao J, Gillis CA, Yang M, et al. Comparison of medical costs among patients using adalimumab and infliximab: a retrospective study (COMPAIRS). *Inflamm Bowel Dis.* 2012;18(11):2043-55.

Swaminath A, Ullman T, Rosen M, Mayer L, Lichtiger S, Abreu MT. Early clinical experience with adalimumab in treatment of inflammatory bowel disease with infliximab-treated and naive patients. *Aliment Pharmacol Ther.* 2009;29(3):273-8.

Swoger JM, Loftus EV, Tremaine WJ, Faubion WA, Pardi DS, Kane SV, et al. Adalimumab for Crohn's disease in clinical practice at Mayo clinic: the first 118 patients. *Inflamm Bowel Dis.* 2010;16(11):1912-21.

Targan SR, Hanauer SB, van Deventer SJ, Mayer L, Present DH, Braakman T, et al. A short-term study of chimeric monoclonal antibody cA2 to tumor necrosis factor alpha for Crohn's disease. Crohn's Disease cA2 Study Group. *N Engl J Med.* 1997;337(15):1029-35.

Taxonera C, Estelles J, Fernandez-Blanco I, Merino O, Marin-Jimenez I, Barreiro-de Acosta M, et al. Adalimumab induction and maintenance therapy for patients with ulcerative colitis previously treated with infliximab. *Aliment Pharmacol Ther.* 2011;33(3):340-8.

Taxonera C, Rodrigo L, Casellas F, Calvet X, Gomez-Camacho F, Ginard D, et al. Infliximab maintenance therapy is associated with decreases in direct resource use in patients with luminal or fistulizing Crohn's disease. *J Clin Gastroenterol.* 2009;43(10):950-6.

Tursi A, Elisei W, Brandimarte G, Giorgetti G, Penna A, Castrignano V. Safety and effectiveness of infliximab for inflammatory bowel diseases in clinical practice. *Eur Rev Med Pharmacol Sci.* 2010;14(1):47-55.

van Balkom BP, Schoon EJ, Stockbrugger RW, Wolters FL, van Hogezaand RA, van Deventer SJ, et al. Effects of anti-tumour necrosis factor-alpha therapy on the quality of life in Crohn's disease. *Aliment Pharmacol Ther.* 2002;16(6):1101-7.



Velayos FS, Kahn JG, Sandborn WJ, Feagan BG. A test-based strategy is more cost effective than empiric dose escalation for patients with Crohn's disease who lose responsiveness to infliximab. *Clin Gastroenterol Hepatol*. 2013;11(6):654-66.

Vermeire S, Louis E, Carbonez A, Van Assche G, Noman M, Belaiche J, et al. Demographic and clinical parameters influencing the short-term outcome of anti-tumor necrosis factor (infliximab) treatment in Crohn's disease. *Am J Gastroenterol*. 2002;97(9):2357-63.

Waters HC, Vanderpoel JE, Nejadnik B, McKenzie RS, Lunacsek OE, Lennert BJ, et al. Resource utilization before and during infliximab therapy in patients with inflammatory bowel disease. *J Med Econ*. 2012;15(1):45-52.

Waugh AW, Garg S, Matic K, Gramlich L, Wong C, Sadowski DC, et al. Maintenance of clinical benefit in Crohn's disease patients after discontinuation of infliximab: long-term follow-up of a single centre cohort. *Aliment Pharmacol Ther*. 2010;32(9):1129-34.

West RL, Zelinkova Z, Wolbink GJ, Kuipers EJ, Stokkers PC, van der Woude CJ. Immunogenicity negatively influences the outcome of adalimumab treatment in Crohn's disease. *Aliment Pharmacol Ther*. 2008;28(9):1122-6.

Wu EQ, Mulani PM, Yu AP, Tang J, Pollack PF. Loss of treatment response to infliximab maintenance therapy in Crohn's disease: a payor perspective. *Value Health*. 2008;11(5):820-9.

Zorzi F, Zuzzi S, Onali S, Calabrese E, Condino G, Petruzzello C, et al. Efficacy and safety of infliximab and adalimumab in Crohn's disease: a single centre study. *Aliment Pharmacol Ther*. 2012;35(12):1397-407.

## References

1. Afif W, Leighton JA, Hanauer SB, Loftus EV, Jr., Faubion WA, Pardi DS, et al. Open-label study of adalimumab in patients with ulcerative colitis including those with prior loss of response or intolerance to infliximab. *Inflamm Bowel Dis*. 2009;15(9):1302-7.
2. Oussalah A, Laclotte C, Chevaux JB, Bensenane M, Babouri A, Serre AA, et al. Long-term outcome of adalimumab therapy for ulcerative colitis with intolerance or lost response to infliximab: a single-centre experience. *Aliment Pharmacol Ther*. 2008;28(8):966-72.
3. Mocchiato F, Renna S, Orlando A, Rizzuto G, Sinagra E, Orlando E, et al. Cyclosporine or infliximab as rescue therapy in severe refractory ulcerative colitis: early and long-term data from a retrospective observational study. *J Crohns Colitis*. 2012;6(6):681-6.
4. Taxonera C, Estelles J, Fernandez-Blanco I, Merino O, Marin-Jimenez I, Barreiro-de Acosta M, et al. Adalimumab induction and maintenance therapy for patients with ulcerative colitis previously treated with infliximab. *Aliment Pharmacol Ther*. 2011;33(3):340-8.
5. Louis E, Lofberg R, Reinisch W, Camez A, Yang M, Pollack PF, et al. Adalimumab improves patient-reported outcomes and reduces indirect costs in patients with moderate to severe Crohn's disease: results from the CARE trial. *J Crohns Colitis*. 2013;7(1):34-43.
6. Cordero Ruiz P, Castro Marquez C, Mendez Rufian V, Castro Laria L, Caunedo Alvarez A, Romero Vazquez J, et al. Efficacy of adalimumab in patients with Crohn's disease and failure to infliximab therapy: a clinical series. *Rev Esp Enferm Dig*. 2011;103(6):294-8.
7. Reenaers C, Louis E, Belaiche J, Seidel L, Keshav S, Travis S. Does co-treatment with immunosuppressors improve outcome in patients with Crohn's disease treated with adalimumab? *Aliment Pharmacol Ther*. 2012;36(11-12):1040-8.
8. Bhalme M, Sharma A, Keld R, Willert R, Campbell S. Does weight-adjusted anti-tumour necrosis factor treatment favour obese patients with Crohn's disease? *Eur J Gastroenterol Hepatol*. 2013;25(5):543-9.
9. Bultman E, de Haar C, van Liere-Baron A, Verhoog H, West RL, Kuipers EJ, et al. Predictors of dose escalation of adalimumab in a prospective cohort of Crohn's disease patients. *Aliment Pharmacol Ther*. 2012;35(3):335-41.
10. Sandborn WJ, Abreu MT, D'Haens G, Colombel JF, Vermeire S, Mitchev K, et al. Certolizumab pegol in patients with moderate to severe Crohn's disease and secondary failure to infliximab. *Clin Gastroenterol Hepatol*. 2010;8(8):688-95.e2.
11. Swoger JM, Loftus EV, Tremaine WJ, Faubion WA, Pardi DS, Kane SV, et al. Adalimumab for Crohn's disease in clinical practice at Mayo clinic: the first 118 patients. *Inflamm Bowel Dis*. 2010;16(11):1912-21.
12. Ho GT, Smith L, Aitken S, Lee HM, Ting T, Fennell J, et al. The use of adalimumab in the management of refractory Crohn's disease. *Aliment Pharmacol Ther*. 2008;27(4):308-15.
13. Cohen RD, Lewis JR, Turner H, Harrell LE, Hanauer SB, Rubin DT. Predictors of adalimumab dose escalation in patients with Crohn's disease at a tertiary referral center. *Inflamm Bowel Dis*. 2012;18(1):10-6.
14. Panaccione R, Loftus EV, Jr., Binion D, McHugh K, Alam S, Chen N, et al. Efficacy and safety of adalimumab in Canadian patients with moderate to severe Crohn's disease: results of the Adalimumab in Canadian SubjeCts with ModERate to Severe Crohn's Disease (ACCESS) trial. *Can J Gastroenterol*. 2011;25(8):419-25.
15. Fortea-Ormaechea JI, Gonzalez-Lama Y, Casis B, Chaparro M, Lopez Serrano P, Van Domselaar M, et al. Adalimumab is effective in long-term real life clinical practice in both luminal and perianal Crohn's disease. The Madrid experience. *Gastroenterol Hepatol*. 2011;34(7):443-8.
16. Russo EA, Iacucci M, Lindsay JO, Campbell S, Hart A, Hamlin J, et al. Survey on the use of adalimumab as maintenance therapy in Crohn's disease in England and Ireland. *Eur J Gastroenterol Hepatol*. 2010;22(3):334-9.
17. Echarri A, Castro J, Barreiro M, Carpio D, Pereira S, Lorenzo A. Evaluation of adalimumab therapy in multidisciplinary strategy for perianal Crohn's disease patients with infliximab failure. *J Crohns Colitis*. 2010;4(6):654-60.
18. Lees CW, Ali AI, Thompson AI, Ho GT, Forsythe RO, Marquez L, et al. The safety profile of anti-tumour necrosis factor therapy in inflammatory bowel disease in clinical practice: analysis of 620 patient-years follow-up. *Aliment Pharmacol Ther*. 2009;29(3):286-97.

19. Ho GT, Mowat A, Potts L, Cahill A, Mowat C, Lees CW, et al. Efficacy and complications of adalimumab treatment for medically-refractory Crohn's disease: analysis of nationwide experience in Scotland (2004-2008). *Aliment Pharmacol Ther.* 2009;29(5):527-34.
20. West RL, Zelinkova Z, Wolbink GJ, Kuipers EJ, Stokkers PC, van der Woude CJ. Immunogenicity negatively influences the outcome of adalimumab treatment in Crohn's disease. *Aliment Pharmacol Ther.* 2008;28(9):1122-6.
21. Peyrin-Biroulet L, Laclotte C, Bigard MA. Adalimumab maintenance therapy for Crohn's disease with intolerance or lost response to infliximab: an open-label study. *Aliment Pharmacol Ther.* 2007;25(6):675-80.
22. Gu J, Remzi FH, Shen B, Vogel JD, Kiran RP. Operative strategy modifies risk of pouch-related outcomes in patients with ulcerative colitis on preoperative anti-tumor necrosis factor-alpha therapy. *Dis Colon Rectum.* 2013;56(11):1243-52.
23. Chaparro M, Burgueno P, Iglesias E, Panes J, Munoz F, Bastida G, et al. Infliximab salvage therapy after failure of ciclosporin in corticosteroid-refractory ulcerative colitis: a multicentre study. *Aliment Pharmacol Ther.* 2012;35(2):275-83.
24. Waters HC, Vanderpoel JE, Nejadnik B, McKenzie RS, Lunacsek OE, Lennert BJ, et al. Resource utilization before and during infliximab therapy in patients with inflammatory bowel disease. *J Med Econ.* 2012;15(1):45-52.
25. Rostholder E, Ahmed A, Cheifetz AS, Moss AC. Outcomes after escalation of infliximab therapy in ambulatory patients with moderately active ulcerative colitis. *Aliment Pharmacol Ther.* 2012;35(5):562-7.
26. Laharie D, Bourreille A, Branche J, Allez M, Bouhnik Y, Filippi J, et al. Ciclosporin versus infliximab in patients with severe ulcerative colitis refractory to intravenous steroids: a parallel, open-label randomised controlled trial. *Lancet.* 2012;380(9857):1909-15.
27. Alzafiri R, Holcroft CA, Malolepszy P, Cohen A, Szilagyi A. Infliximab therapy for moderately severe Crohn's disease and ulcerative colitis: a retrospective comparison over 6 years. *Clin Exp Gastroenterol.* 2011;4.
28. Oussalah A, Evesque L, Laharie D, Roblin X, Boschetti G, Nancey S, et al. A multicenter experience with infliximab for ulcerative colitis: outcomes and predictors of response, optimization, colectomy, and hospitalization. *Am J Gastroenterol.* 2010;105(12):2617-25.
29. Herrlinger KR, Barthel DN, Schmidt KJ, Buning J, Barthel CS, Wehkamp J, et al. Infliximab as rescue medication for patients with severe ulcerative/indeterminate colitis refractory to tacrolimus. *Aliment Pharmacol Ther.* 2010;31(9):1036-41.
30. Jurgens M, Laubender RP, Hartl F, Weidinger M, Seiderer J, Wagner J, et al. Disease activity, ANCA, and IL23R genotype status determine early response to infliximab in patients with ulcerative colitis. *Am J Gastroenterol.* 2010;105(8):1811-9.
31. Gies N, Kroeker KI, Wong K, Fedorak RN. Treatment of ulcerative colitis with adalimumab or infliximab: long-term follow-up of a single-centre cohort. *Aliment Pharmacol Ther.* 2010;32(4):522-8.
32. Ananthakrishnan AN, Issa M, Beaulieu DB, Skaros S, Knox JF, Lemke K, et al. History of medical hospitalization predicts future need for colectomy in patients with ulcerative colitis. *Inflamm Bowel Dis.* 2009;15(2):176-81.
33. Ho GT, Lee HM, Brydon G, Ting T, Hare N, Drummond H, et al. Fecal calprotectin predicts the clinical course of acute severe ulcerative colitis. *Am J Gastroenterol.* 2009;104(3):673-8.
34. Sandborn WJ, Rutgeerts P, Feagan BG, Reinisch W, Olson A, Johanns J, et al. Colectomy rate comparison after treatment of ulcerative colitis with placebo or infliximab. *Gastroenterology.* 2009;137(4):1250-60; quiz 520.
35. Aratari A, Papi C, Clemente V, Moretti A, Luchetti R, Koch M, et al. Colectomy rate in acute severe ulcerative colitis in the infliximab era. *Dig Liver Dis.* 2008;40(10):821-6.
36. Maser EA, Deconda D, Lichtiger S, Ullman T, Present DH, Kornbluth A. Cyclosporine and infliximab as rescue therapy for each other in patients with steroid-refractory ulcerative colitis. *Clin Gastroenterol Hepatol.* 2008;6(10):1112-6.
37. Regueiro M, Curtis J, Plevy S. Infliximab for hospitalized patients with severe ulcerative colitis. *J Clin Gastroenterol.* 2006;40(6):476-81.
38. Gornet JM, Couve S, Hassani Z, Delchier JC, Marteau P, Cosnes J, et al. Infliximab for refractory ulcerative colitis or indeterminate colitis: an open-label multicentre study. *Aliment Pharmacol Ther.* 2003;18(2):175-81.

39. Probert CS, Hearing SD, Schreiber S, Kuhbacher T, Ghosh S, Arnott ID, et al. Infliximab in moderately severe glucocorticoid resistant ulcerative colitis: a randomised controlled trial. *Gut*. 2003;52(7):998-1002.
40. Su C, Salzberg BA, Lewis JD, Deren JJ, Kornbluth A, Katzka DA, et al. Efficacy of anti-tumor necrosis factor therapy in patients with ulcerative colitis. *Am J Gastroenterol*. 2002;97(10):2577-84.
41. Patil SA, Rustgi A, Langenberg P, Cross RK. Comparative Effectiveness of Anti-TNF Agents for Crohn's Disease in a Tertiary Referral IBD Practice. *Dig Dis Sci*. 2013;58(1):209-15.
42. Lindsay JO, Chipperfield R, Giles A, Wheeler C, Orchard T. A UK retrospective observational study of clinical outcomes and healthcare resource utilisation of infliximab treatment in Crohn's disease. *Aliment Pharmacol Ther*. 2013;38(1):52-61.
43. Osterman MT, Haynes K, Delzell E, Zhang J, Bewtra M, Brensinger C, et al. Comparative effectiveness of infliximab and adalimumab for Crohn's disease. *Clin Gastroenterol Hepatol*. 2014;12(5):811-7.e3.
44. Ghazi LJ, Patil SA, Rustgi A, Flasar MH, Razeghi S, Cross RK. Step up versus early biologic therapy for Crohn's disease in clinical practice. *Inflamm Bowel Dis*. 2013;19(7):1397-403.
45. Seminerio JL, Loftus EV, Jr., Colombel JF, Thapa P, Sandborn WJ. Infliximab for Crohn's disease: the first 500 patients followed up through 2009. *Dig Dis Sci*. 2013;58(3):797-806.
46. Sprakes MB, Ford AC, Warren L, Greer D, Hamlin J. Efficacy, tolerability, and predictors of response to infliximab therapy for Crohn's disease: a large single centre experience. *J Crohns Colitis*. 2012;6(2):143-53.
47. Sakuraba A, Keyashian K, Correia C, Melek J, Cohen RD, Hanauer SB, et al. Natalizumab in Crohn's disease: results from a US tertiary inflammatory bowel disease center. *Inflamm Bowel Dis*. 2013;19(3):621-6.
48. Zorzi F, Zuzzi S, Onali S, Calabrese E, Condino G, Petruzzello C, et al. Efficacy and safety of infliximab and adalimumab in Crohn's disease: a single centre study. *Aliment Pharmacol Ther*. 2012;35(12):1397-407.
49. de la Poza G, Lopez-Sanroman A, Taxonera C, Marin-Jimenez I, Gisbert JP, Bermejo F, et al. Genital fistulas in female Crohn's disease patients.: clinical characteristics and response to therapy. *J Crohns Colitis*. 2012;6(3):276-80.
50. Katz L, Gisbert JP, Manoogian B, Lin K, Steenholdt C, Mantzaris GJ, et al. Doubling the infliximab dose versus halving the infusion intervals in Crohn's disease patients with loss of response. *Inflamm Bowel Dis*. 2012;18(11):2026-33.
51. Chaparro M, Panes J, Garcia V, Merino O, Nos P, Domenech E, et al. Long-term durability of response to adalimumab in Crohn's disease. *Inflamm Bowel Dis*. 2012;18(4):685-90.
52. Chaparro M, Martinez-Montiel P, Van Domselaar M, Bermejo F, Perez-Calle JL, Casis B, et al. Intensification of infliximab therapy in Crohn's disease: efficacy and safety. *J Crohns Colitis*. 2012;6(1):62-7.
53. Chaparro M, Panes J, Garcia V, Manosa M, Esteve M, Merino O, et al. Long-term durability of infliximab treatment in Crohn's disease and efficacy of dose "escalation" in patients losing response. *J Clin Gastroenterol*. 2011;45(2):113-8.
54. Haveran LA, Sehgal R, Poritz LS, McKenna KJ, Stewart DB, Koltun WA. Infliximab and/or azathioprine in the treatment of Crohn's disease-like complications after IPAA. *Dis Colon Rectum*. 2011;54(1):15-20.
55. Leombruno JP, Nguyen GC, Grootendorst P, Juurlink D, Einarson T. Hospitalization and surgical rates in patients with Crohn's disease treated with infliximab: a matched analysis. *Pharmacoepidemiol Drug Saf*. 2011;20(8):838-48.
56. Sprakes MB, Hamlin PJ, Warren L, Greer D, Ford AC. Adalimumab as second line anti-tumour necrosis factor alpha therapy for Crohn's disease: A single centre experience. *J Crohns Colitis*. 2011;5(4):324-31.
57. Billioud V, Laharie D, Filippi J, Roblin X, Oussalah A, Chevaux JB, et al. Adherence to adalimumab therapy in Crohn's disease: a French multicenter experience. *Inflamm Bowel Dis*. 2011;17(1):152-9.
58. Nugent Z, Blanchard JF, Bernstein CN. A population-based study of health-care resource use among infliximab users. *Am J Gastroenterol*. 2010;105(9):2009-16.
59. Panaccione R, Colombel JF, Sandborn WJ, Rutgeerts P, D'Haens GR, Robinson AM, et al. Adalimumab sustains clinical remission and overall clinical benefit after 2 years of therapy for Crohn's disease. *Aliment Pharmacol Ther*. 2010;31(12):1296-309.
60. Allez M, Vermeire S, Mozziconacci N, Michetti P, Laharie D, Louis E, et al. The efficacy and safety of a third anti-TNF monoclonal antibody in Crohn's disease after failure of two other anti-TNF antibodies. *Aliment Pharmacol Ther*. 2010;31(1):92-101.

61. Sprakes MB, Ford AC, Soares NC, Warren L, Greer D, Donnellan CF, et al. Costs of care for Crohn's disease following the introduction of infliximab: a single-centre UK experience. *Aliment Pharmacol Ther.* 2010;32(11-12):1357-63.
62. Stein DJ, Ananthakrishnan AN, Issa M, Williams JB, Beaulieu DB, Zadvornova Y, et al. Impact of prior irregular infliximab dosing on performance of long-term infliximab maintenance therapy in Crohn's disease. *Inflamm Bowel Dis.* 2010;16(7):1173-9.
63. Hamzaoglu H, Cooper J, Alsahli M, Falchuk KR, Peppercorn MA, Farrell RJ. Safety of infliximab in Crohn's disease: a large single-center experience. *Inflamm Bowel Dis.* 2010;16(12):2109-16.
64. Taxonera C, Rodrigo L, Casellas F, Calvet X, Gomez-Camacho F, Ginard D, et al. Infliximab maintenance therapy is associated with decreases in direct resource use in patients with luminal or fistulizing Crohn's disease. *J Clin Gastroenterol.* 2009;43(10):950-6.
65. Schluender SJ, Ippoliti A, Dubinsky M, Vasiliauskas EA, Papadakis KA, Mei L, et al. Does infliximab influence surgical morbidity of ileal pouch-anal anastomosis in patients with ulcerative colitis? *Dis Colon Rectum.* 2007;50(11):1747-53.
66. Saro C, da la Coba C, Casado MA, Morales JM, Otero B. Resource use in patients with Crohn's disease treated with infliximab. *Aliment Pharmacol Ther.* 2007;26(10):1313-23.
67. Jewell DP, Satsangi J, Lobo A, Probert C, Forbes A, Ghosh S, et al. Infliximab use in Crohn's disease: impact on health care resources in the UK. *Eur J Gastroenterol Hepatol.* 2005;17(10):1047-52.
68. Rutgeerts P, Feagan BG, Lichtenstein GR, Mayer LF, Schreiber S, Colombel JF, et al. Comparison of scheduled and episodic treatment strategies of infliximab in Crohn's disease. *Gastroenterology.* 2004;126(2):402-13.
69. Sands BE, Anderson FH, Bernstein CN, Chey WY, Feagan BG, Fedorak RN, et al. Infliximab Maintenance Therapy for Fistulizing Crohn's Disease. *N Engl J Med.* 2004;350(9):876-85.
70. Vermeire S, Louis E, Carbonez A, Van Assche G, Noman M, Belaiche J, et al. Demographic and clinical parameters influencing the short-term outcome of anti-tumor necrosis factor (infliximab) treatment in Crohn's disease. *Am J Gastroenterol.* 2002;97(9):2357-63.
71. Arnott ID, McDonald D, Williams A, Ghosh S. Clinical use of Infliximab in Crohn's disease: the Edinburgh experience. *Aliment Pharmacol Ther.* 2001;15(10):1639-46.
72. Sandborn WJ, Colombel JF, D'Haens G, Van Assche G, Wolf D, Kron M, et al. One-year maintenance outcomes among patients with moderately-to-severely active ulcerative colitis who responded to induction therapy with adalimumab: subgroup analyses from ULTRA 2. *Aliment Pharmacol Ther.* 2013;37(2):204-13.
73. Sandborn WJ, van Assche G, Reinisch W, Colombel JF, D'Haens G, Wolf DC, et al. Adalimumab induces and maintains clinical remission in patients with moderate-to-severe ulcerative colitis. *Gastroenterology.* 2012;142(2):257-65.e1-3.
74. Tursi A, Elisei W, Brandimarte G, Giorgetti G, Penna A, Castrignano V. Safety and effectiveness of infliximab for inflammatory bowel diseases in clinical practice. *Eur Rev Med Pharmacol Sci.* 2010;14(1):47-55.
75. Steenholdt C, Palarasah Y, Bendtzen K, Teisner A, Brynskov J, Teisner B, et al. Pre-existing IgG antibodies cross-reacting with the Fab region of infliximab predict efficacy and safety of infliximab therapy in inflammatory bowel disease. *Aliment Pharmacol Ther.* 2013;37(12):1172-83.
76. Cottone M, Kohn A, Daperno M, Armuzzi A, Guidi L, D'Inca R, et al. Advanced age is an independent risk factor for severe infections and mortality in patients given anti-tumor necrosis factor therapy for inflammatory bowel disease. *Clin Gastroenterol Hepatol.* 2011;9(1):30-5.
77. Rutgeerts P, D'Haens G, Targan S, Vasiliauskas E, Hanauer SB, Present DH, et al. Efficacy and safety of retreatment with anti-tumor necrosis factor antibody (infliximab) to maintain remission in Crohn's disease. *Gastroenterology.* 1999;117(4):761-9.
78. Colombel JF, Sandborn WJ, Rutgeerts P, Kamm MA, Yu AP, Wu EQ, et al. Comparison of two adalimumab treatment schedule strategies for moderate-to-severe Crohn's disease: results from the CHARM trial. *Am J Gastroenterol.* 2009;104(5):1170-9.
79. Chaparro M, Andreu M, Barreiro-de Acosta M, Garcia-Planella E, Ricart E, Domenech E, et al. Effectiveness of infliximab after adalimumab failure in Crohn's disease. *World J Gastroenterol.* 2012;18(37):5219-24.
80. Barreiro-de-Acosta M, Lorenzo A, Dominguez-Munoz JE. Efficacy of adalimumab for the treatment of extraintestinal manifestations of Crohn's disease. *Rev Esp Enferm Dig.* 2012;104(9):468-72.

81. Lichtenstein GR, Feagan BG, Cohen RD, Salzberg BA, Diamond RH, Price S, et al. Serious infection and mortality in patients with Crohn's disease: more than 5 years of follow-up in the TREAT registry. *Am J Gastroenterol.* 2012;107(9):1409-22.
82. Oussalah A, Chevaux JB, Fay R, Sandborn WJ, Bigard MA, Peyrin-Biroulet L. Predictors of infliximab failure after azathioprine withdrawal in Crohn's disease treated with combination therapy. *Am J Gastroenterol.* 2010;105(5):1142-9.
83. Waugh AW, Garg S, Matic K, Gramlich L, Wong C, Sadowski DC, et al. Maintenance of clinical benefit in Crohn's disease patients after discontinuation of infliximab: long-term follow-up of a single centre cohort. *Aliment Pharmacol Ther.* 2010;32(9):1129-34.
84. Lichtiger S, Binion DG, Wolf DC, Present DH, Bensimon AG, Wu E, et al. The CHOICE trial: adalimumab demonstrates safety, fistula healing, improved quality of life and increased work productivity in patients with Crohn's disease who failed prior infliximab therapy. *Aliment Pharmacol Ther.* 2010;32(10):1228-39.
85. Sandborn WJ, Rutgeerts P, Enns R, Hanauer SB, Colombel JF, Panaccione R, et al. Adalimumab induction therapy for Crohn disease previously treated with infliximab: a randomized trial. *Ann Intern Med.* 2007;146(12):829-38.
86. Casellas F, Rodrigo L, Nino P, Pantiga C, Riestra S, Malagelada JR. Sustained improvement of health-related quality of life in Crohn's disease patients treated with infliximab and azathioprine for 4 years. *Inflamm Bowel Dis.* 2007;13(11):1395-400.
87. Sands BE, Kozarek R, Spainhour J, Barish CF, Becker S, Goldberg L, et al. Safety and tolerability of concurrent natalizumab treatment for patients with Crohn's disease not in remission while receiving infliximab. *Inflamm Bowel Dis.* 2007;13(1):2-11.
88. Rutgeerts P, Sandborn WJ, Fedorak RN, Rachmilewitz D, Tarabar D, Gibson P, et al. Onercept for moderate-to-severe Crohn's disease: a randomized, double-blind, placebo-controlled trial. *Clin Gastroenterol Hepatol.* 2006;4(7):888-93.
89. Lemann M, Mary JY, Duclos B, Veyrac M, Dupas JL, Delchier JC, et al. Infliximab plus azathioprine for steroid-dependent Crohn's disease patients: a randomized placebo-controlled trial. *Gastroenterology.* 2006;130(4):1054-61.
90. Rodrigo L, Perez-Pariente JM, Fuentes D, Cadahia V, Garcia-Carbonero A, Nino P, et al. Retreatment and maintenance therapy with infliximab in fistulizing Crohn's disease. *Rev Esp Enferm Dig.* 2004;96(8):548-54; 54-8.
91. Targan SR, Hanauer SB, van Deventer SJ, Mayer L, Present DH, Braakman T, et al. A short-term study of chimeric monoclonal antibody cA2 to tumor necrosis factor alpha for Crohn's disease. Crohn's Disease cA2 Study Group. *N Engl J Med.* 1997;337(15):1029-35.
92. Pearce CB, Lawrance IC. Careful patient selection may improve response rates to infliximab in inflammatory bowel disease. *J Gastroenterol Hepatol.* 2007;22(10):1671-7.
93. Carter CT, Leher H, Smith P, Smith DB, Waters HC. Impact of persistence with infliximab on hospitalizations in ulcerative colitis. *Am J Manag Care.* 2011;17(6):385-92.
94. Carter CT, Waters HC, Smith DB. Impact of infliximab adherence on Crohn's disease-related healthcare utilization and inpatient costs. *Adv Ther.* 2011;28(8):671-83.
95. Loomes DE, Teshima C, Jacobs P, Fedorak RN. Health care resource use and costs in Crohn's disease before and after infliximab therapy. *Can J Gastroenterol.* 2011;25(9):497-502.
96. Kane SV, Chao J, Mulani PM. Adherence to infliximab maintenance therapy and health care utilization and costs by Crohn's disease patients. *Adv Ther.* 2009;26(10):936-46.
97. Wu EQ, Mulani PM, Yu AP, Tang J, Pollack PF. Loss of treatment response to infliximab maintenance therapy in Crohn's disease: a payor perspective. *Value Health.* 2008;11(5):820-9.
98. Sussman DA, Kubiliun N, Mulani PM, Chao J, Gillis CA, Yang M, et al. Comparison of medical costs among patients using adalimumab and infliximab: a retrospective study (COMPAIRS). *Inflamm Bowel Dis.* 2012;18(11):2043-55.
99. Ollendorf DA, Lidsky L. Infliximab drug and infusion costs among patients with Crohn's disease in a commercially-insured setting. *Am J Ther.* 2006;13(6):502-6.
100. Abraham NS, Richardson P, Castillo D, Kane SV. Dual therapy with infliximab and immunomodulator reduces one-year rates of hospitalization and surgery among veterans with inflammatory bowel disease. *Clin Gastroenterol Hepatol.* 2013;11(10):1281-7.
101. Casellas F, Robles V, Borruel N, Torrejon A, Castells I, Navarro E, et al. Restoration of quality of life of patients with inflammatory bowel disease after one year with antiTNFalpha treatment. *J Crohns Colitis.* 2012;6(9):881-6.

102. Banovic I, Gilibert D, Cosnes J. Perception of improved state of health and subjective quality of life in Crohn's disease patients treated with Infliximab. *J Crohns Colitis*. 2009;3(1):25-31.
103. van Balkom BP, Schoon EJ, Stockbrugger RW, Wolters FL, van Hogezaand RA, van Deventer SJ, et al. Effects of anti-tumour necrosis factor-alpha therapy on the quality of life in Crohn's disease. *Aliment Pharmacol Ther*. 2002;16(6):1101-7.
