# Supplementary material for: Characterizing unmet medical need and the potential role of new biologic treatment options in patients with ulcerative colitis and Crohn’s disease: a systematic review and clinician surveys
Source: PubMed Central journal article supplement — Eur J Gastroenterol Hepatol. 2015 Jun 3;27(7):804–12. doi: 10.1097/MEG.0000000000000378 (PMC4892747; doi:10.1097/meg.0000000000000378), 2015-06-03
Supplement: meg-27-804-s002.pdf [file meg-27-804-s002.pdf]

## Supplemental Digital Content 2. Systematic literature review: methodology

### Contents

|                                   |   |
|-----------------------------------|---|
| Study Protocol.....               | 2 |
| Identification of Studies.....    | 2 |
| Limitors .....                    | 2 |
| Study Selection.....              | 2 |
| Data Extraction Strategy .....    | 3 |
| Appendix A. Study Protocol .....  | 5 |
| Appendix B. Search Strategy ..... | 7 |
| B.1 (Medline + PubMed) .....      | 7 |
| B.2 The Cochrane Library .....    | 8 |
| B.3 NHSEED .....                  | 9 |

## **Study Protocol**

A full protocol for the systematic literature review was written, detailing the patient population, interventions and study designs to be analysed. A summary version of the original study protocol is provided in Appendix A.

## **Identification of Studies**

A comprehensive search strategy was designed to retrieve relevant data from published literature; details of the search strategy are presented in Appendix B.

The following databases were searched:

- Embase
- Medline (through PubMed)
- Cochrane Database of Systematic Reviews
- Cochrane Central Register of Controlled Trials
- NHS Economic Evaluation Database
- Health Technology Assessment Database

The search of databases other than the above, conference proceedings and hand searching of the indexes of key journals was not conducted as part of this review. However, bibliographies of relevant systematic reviews were scanned to identify any additional studies.

## **Limitors**

The searches were limited to articles published in English and in human populations. The searches included 15 EU countries (Austria, Belgium, Denmark, Finland, France, Germany, Greece, Ireland, Italy, Luxembourg, the Netherlands, Portugal, Spain, Sweden, UK [England, Wales, Scotland] and 7 other countries (Australia, Brazil, Canada, Mexico, New Zealand, Russia and USA).

## **Study Selection**

The inclusion and exclusion criteria required to select studies that met the objectives of this review were based on the 'PICOS principle' (Patient, Intervention, Comparator, Outcome and Study Design) and are described in Table S1.

**Table S1: Inclusion Criteria for Studies**

| Inclusion Criteria      |                                                        | Implications                                                                                                                                                                                                                                                                                    |
|-------------------------|--------------------------------------------------------|-------------------------------------------------------------------------------------------------------------------------------------------------------------------------------------------------------------------------------------------------------------------------------------------------|
| <b>Study population</b> | Human                                                  | <b>Animal studies were excluded by the searches and rejected during filtering stages.</b>                                                                                                                                                                                                       |
|                         | Patient population                                     | <b>The searches were performed to include all patients with IBD aged <math>\geq 18</math> years.</b>                                                                                                                                                                                            |
| <b>Study design</b>     | Randomised controlled trials (RCTs)                    | <b>Pre-specified study types were included by the search terms.</b>                                                                                                                                                                                                                             |
|                         | Observational studies                                  | <b>All other study types were either excluded by the searches or rejected during filtering stages, e.g. Reviews, editorials, letters and comments.</b>                                                                                                                                          |
|                         | Economic evaluations                                   | <b>Bibliography of relevant systematic reviews and meta- analyses were scanned for any additional studies.</b>                                                                                                                                                                                  |
| <b>Intervention</b>     | Patients with inadequate response to anti-TNF $\alpha$ | <b>Studies including patients with inadequate response to first/second and/or subsequent TNF<math>\alpha</math> antagonists</b>                                                                                                                                                                 |
|                         |                                                        | <b>Studies reporting dose escalation of anti-TNF<math>\alpha</math>, induction/maintenance/re-induction with anti-TNF<math>\alpha</math>, studies reporting patients failing on immunosuppressive agents/corticosteroids/surgery and then initiating anti-TNF therapy will also be included</b> |
| <b>Other</b>            | English language                                       | <b>All other language publications were excluded by the searches and rejected during filtering stages.</b>                                                                                                                                                                                      |
|                         | Country                                                | <b>The searches were performed to include countries of interest only. Countries that are not of interest will be excluded during filtering stages.</b>                                                                                                                                          |

### Data Extraction Strategy

Bibliographic details and abstracts of all citations retrieved by the literature search were downloaded into Endnote version X3.

#### First Pass of Citations

During this stage, titles and abstracts of citations were screened. Those studies that did not meet the eligibility criteria were excluded at this 'first pass' screening stage. Duplicates of citations (due to overlap in the coverage of the databases) were also excluded during first pass screening. Studies that met the criteria at first pass were included and full text copies were ordered. Full text copies of all references that could potentially meet the eligibility criteria were also ordered at this stage.

## Second Pass of Citations

During this stage, the inclusion/exclusion eligibility criteria were applied to the full text citations and the studies presenting relevant data were included for data extraction.

## Prioritisation of Studies

Due to the large number of potentially valuable studies identified at the second pass stage, a prioritisation approach was adopted to select the most relevant studies for data extraction. The criteria for prioritisation of studies included:

- Publication year
- Publication type (full text publication/conference abstract)
- Countries
- Disease type
- Interventions
- Sample size
- Anti-TNF $\alpha$  failure (yes/no)
- Dose escalation (yes/no)
- Switching (yes/no)
- Data extraction strategy

Where more than one publication was identified describing a single trial, the data were compiled into a single entry in the data extraction table to avoid double counting patients. Each publication was referenced in the grid to recognise that more than one publication might have contributed to the entry. Studies that did not report data of interest were excluded during the extraction stage.

## Appendix A. Study Protocol

| Objectives and research questions |                                                                                                                                                                                                                                                                               |
|-----------------------------------|-------------------------------------------------------------------------------------------------------------------------------------------------------------------------------------------------------------------------------------------------------------------------------|
| <b>Primary study question</b>     | To define the “anti-TNF $\alpha$ failure” patient population, treatment patterns, place in therapy and to generate data (clinical and economic) that supports changing the common clinical practice of “TNF cycling” in support of Vedolizumab for the treatment of CD and UC |
| Studies to include                |                                                                                                                                                                                                                                                                               |
| <b>Population</b>                 | Age: Adult $\geq$ 18 years<br>Gender: No limits, non-pregnant females<br>Disease area: Inflammatory bowel disease (CD and UC)<br>Treatment status: Only patients who have failed prior anti-TNF $\alpha$ therapy                                                              |
| <b>Intervention</b>               | No limitations                                                                                                                                                                                                                                                                |
| <b>Comparators</b>                | No limitations                                                                                                                                                                                                                                                                |
| <b>Outcomes</b>                   | Treatment patterns<br>Clinical outcomes<br>Adverse events<br>Cost outcomes                                                                                                                                                                                                    |
| <b>Study designs</b>              | Included:<br>Randomised controlled trials<br>Non-randomised trials<br>Observational studies<br>Excluded:<br>Review, comments, case reports, editorials                                                                                                                        |
|                                   | NB: Bibliographic searches of identified systematic reviews will be conducted                                                                                                                                                                                                 |
| <b>Language</b>                   | English language only                                                                                                                                                                                                                                                         |
| <b>Publication timeframe</b>      | No limits                                                                                                                                                                                                                                                                     |
| Data sources                      |                                                                                                                                                                                                                                                                               |
| <b>Databases</b>                  | Medline<br>Embase<br>Cochrane Library<br>NHSEED                                                                                                                                                                                                                               |
| <b>Other</b>                      | Bibliographic searching of identified relevant systematic reviews                                                                                                                                                                                                             |
| Information to extract            |                                                                                                                                                                                                                                                                               |
| <b>Study information</b>          | Study objectives<br>Study country/ies/region<br>Study design and methods<br>Number of patients screened and included<br>Interventions (as per categories)<br>Study endpoints<br>Conclusions drawn by investigators                                                            |

|                                                                                                                                                              |                                                                                                                                                                                                                                                                                                                                                                                                                                                                   |
|--------------------------------------------------------------------------------------------------------------------------------------------------------------|-------------------------------------------------------------------------------------------------------------------------------------------------------------------------------------------------------------------------------------------------------------------------------------------------------------------------------------------------------------------------------------------------------------------------------------------------------------------|
| <b>Baseline data</b>                                                                                                                                         | <p>Age<br/>Gender,<br/>Presence of co morbidities<br/>Baseline severity of disease<br/>Baseline demographics<br/>Number of years on anti-TNF<math>\alpha</math> therapy<br/>Number of anti-TNF<math>\alpha</math> treated patients</p>                                                                                                                                                                                                                            |
| <b>Clinical outcomes</b>                                                                                                                                     | <p>Treatment pattern<br/>Clinical response/remission<br/>Inadequate response to anti-TNF<math>\alpha</math><br/>Other clinical outcomes</p>                                                                                                                                                                                                                                                                                                                       |
| <b>Safety and Tolerability Outcomes</b>                                                                                                                      | <p>Total withdrawals for RCTs<br/>Withdrawals due to lack of tolerance to treatment/any adverse events/ serious adverse events related to inadequate treatment response<br/>AEs related to anti-TNF<math>\alpha</math> therapy<br/>Other AEs</p>                                                                                                                                                                                                                  |
| <b>Economic outcomes</b>                                                                                                                                     | <p>Monitoring costs (routine tests, labs etc.)<br/>Direct costs - associated with treatment/management, concomitant medications, adverse events, office visits, hospitalisations related to “anti-TNF<math>\alpha</math> failure patients”<br/>Indirect costs (productivity loss/ absenteeism) for anti-TNF<math>\alpha</math> inadequate responders/failure<br/>Overall total drug costs and total costs of patients initiating anti-TNF<math>\alpha</math>s</p> |
| <b>Analyses</b>                                                                                                                                              |                                                                                                                                                                                                                                                                                                                                                                                                                                                                   |
| <b>Qualitative- summaries of study characteristics including critical appraisal</b>                                                                          |                                                                                                                                                                                                                                                                                                                                                                                                                                                                   |
| <b>Reporting</b>                                                                                                                                             |                                                                                                                                                                                                                                                                                                                                                                                                                                                                   |
| <p><b>As per flowchart for preferred reporting items for systematic reviews and meta-analyses (PRISMA) as presented in Figure 1.</b><br/>MS Word<br/>PDF</p> |                                                                                                                                                                                                                                                                                                                                                                                                                                                                   |

## Appendix B. Search Strategy

### B.1 (Medline + PubMed)

Total number of hits: 3721

| Sr. No. | Search String                                                                                                                                                                                                                                                                     | Hits    |
|---------|-----------------------------------------------------------------------------------------------------------------------------------------------------------------------------------------------------------------------------------------------------------------------------------|---------|
| 1.      | 'crohn disease'/exp OR 'Crohn disease' OR 'Crohns disease'                                                                                                                                                                                                                        | 56543   |
| 2.      | 'Ulcerative Colitis'/exp OR 'UC'                                                                                                                                                                                                                                                  | 73351   |
| 3.      | 'inflammatory bowel disease'/exp OR 'inflammatory bowel disease' OR IBD:ab,ti                                                                                                                                                                                                     | 368185  |
| 4.      | 'colitis'/exp OR colitis:ab,ti                                                                                                                                                                                                                                                    | 131809  |
| 5.      | 'ileitis'/exp OR 'ileitis':ab,ti                                                                                                                                                                                                                                                  | 4703    |
| 6.      | #1 OR #2 OR #3 OR #4 OR #5                                                                                                                                                                                                                                                        | 398325  |
| 7.      | 'anti-tumour necrosis factor alpha' OR 'anti tumor necrosis factor alpha' OR 'anti-tumour necrosis factor alpha antibody' OR 'anti tumor necrosis factor alpha antibody'                                                                                                          | 548     |
| 8.      | 'anti-tumour necrosis factor antibody' OR 'anti tumor necrosis factor antibody' OR 'anti TNF' OR 'anti TNF alpha'                                                                                                                                                                 | 11256   |
| 9.      | Infliximab OR Remicade                                                                                                                                                                                                                                                            | 26759   |
| 10.     | Certolizumab OR Natalizumab                                                                                                                                                                                                                                                       | 6608    |
| 11.     | Adalimumab OR Humira                                                                                                                                                                                                                                                              | 13196   |
| 12.     | Golimumab OR Simponi                                                                                                                                                                                                                                                              | 1627    |
| 13.     | Onercept OR Etanercept                                                                                                                                                                                                                                                            | 17558   |
| 14.     | #7 OR #8 OR #9 OR #10 OR #11 OR #12 OR #13                                                                                                                                                                                                                                        | 45563   |
| 15.     | 'Treatment pathways' OR 'treatment sequence' OR 'treatment switch'                                                                                                                                                                                                                | 1278    |
| 16.     | 'treatment patterns' OR 'treatment paradigm'                                                                                                                                                                                                                                      | 4255    |
| 17.     | 'treatment failure'/exp OR 'treatment failure':ab,ti OR 'TNF cycling':ab,ti OR 'TNF failure':ab,ti                                                                                                                                                                                | 85056   |
| 18.     | 'Dose escalation' OR de-intensification OR 'medical diagnosis' OR 'prior treatments' OR 'previous treatments'                                                                                                                                                                     | 29546   |
| 19.     | 'cost'/exp OR 'health care cost'/exp OR 'cost of illness'/exp OR 'direct costs' OR 'indirect costs'                                                                                                                                                                               | 254902  |
| 20.     | 'quality of life'/exp OR 'quality of life':ab,ti OR qol:ab,ti                                                                                                                                                                                                                     | 285315  |
| 21.     | hospitalization:ab,ti OR employment:ab,ti OR productivity:ab,ti                                                                                                                                                                                                                   | 174758  |
| 22.     | #15 OR #16 OR #17 OR #18 OR #19 OR #20 OR #21                                                                                                                                                                                                                                     | 781288  |
| 23.     | #6 AND #14 AND #22                                                                                                                                                                                                                                                                | 6672    |
| 24.     | 'austria'/exp OR austria:ab,ti OR 'belgium'/exp OR belgium:ab,ti OR 'denmark'/exp OR denmark:ab,ti OR 'finland'/exp OR finland:ab,ti OR 'france'/exp OR france:ca,ab,ti OR 'germany'/exp OR germany:ca,ab,ti OR 'greece'/exp OR greece:ab,ti OR 'ireland'/exp OR ireland:ab,ti OR | 5571890 |

'italy'/exp OR italy:ca,ab,ti OR 'luxembourg'/exp OR luxembourg:ab,ti OR luxemberg:ab,ti OR 'netherlands'/exp OR netherlands:ca,ab,ti OR 'portugal'/exp OR portugal:ab,ti OR 'spain'/exp OR spain:ca,ab,ti OR 'sweden'/exp OR sweden:ab,ti OR 'united kingdom'/exp OR 'united kingdom':ca,ab,ti OR england:ca,ab,ti OR wales:ab,ti OR scotland:ab,ti

|            |                                                                                                                                                                                                                      |          |
|------------|----------------------------------------------------------------------------------------------------------------------------------------------------------------------------------------------------------------------|----------|
| <b>25.</b> | 'canada'/exp OR canada:ca,ab,ti OR 'australia'/exp OR australia:ca,ab,ti OR 'new zealand'/exp OR 'new zealand':ab,ti OR 'mexico'/exp OR mexico:ab,ti OR 'russia'/exp OR russia:ab,ti OR 'brazil'/exp OR brazil:ab,ti | 1344351  |
| <b>26.</b> | 'united states'/exp OR 'united states':ca,ab,ti                                                                                                                                                                      | 6207349  |
| <b>27.</b> | #24 OR #25 OR #26                                                                                                                                                                                                    | 12914291 |
| <b>28.</b> | #23 AND #27                                                                                                                                                                                                          | 4968     |
| <b>29.</b> | #28 AND [humans]/lim AND [english]/lim AND [abstracts]/lim                                                                                                                                                           | 3721     |

## B.2 The Cochrane Library

Total number of hits: 131

| Sr. No.    | Search String                                                                                                                                                            | Hits  |
|------------|--------------------------------------------------------------------------------------------------------------------------------------------------------------------------|-------|
| <b>1.</b>  | MeSH descriptor: [Crohn Disease] explode all trees                                                                                                                       | 895   |
| <b>2.</b>  | MeSH descriptor: [Colitis, Ulcerative] explode all trees                                                                                                                 | 856   |
| <b>3.</b>  | MeSH descriptor: [Inflammatory Bowel Diseases] explode all trees                                                                                                         | 1801  |
| <b>4.</b>  | MeSH descriptor: [Colitis] explode all trees                                                                                                                             | 960   |
| <b>5.</b>  | MeSH descriptor: [Ileitis] explode all trees                                                                                                                             | 46    |
| <b>6.</b>  | 'Crohn disease' OR 'Crohns disease' OR 'Ulcerative Colitis' OR UC OR 'inflammatory bowel disease' OR IBD OR colitis or ileitis                                           | 6575  |
| <b>7.</b>  | #1 OR #2 OR #3 OR #4 OR #5 OR #6                                                                                                                                         | 6579  |
| <b>8.</b>  | 'anti-tumour necrosis factor alpha' OR 'anti tumor necrosis factor alpha' OR 'anti-tumour necrosis factor alpha antibody' OR 'anti tumor necrosis factor alpha antibody' | 1008  |
| <b>9.</b>  | 'anti-tumour necrosis factor antibody' OR 'anti tumor necrosis factor antibody' OR 'anti TNF' OR 'anti TNF alpha'                                                        | 1131  |
| <b>10.</b> | Infliximab OR Remicade                                                                                                                                                   | 721   |
| <b>11.</b> | Certolizumab OR Natalizumab OR antegren OR tysabri OR 'certolizumab pegol' OR cimzia                                                                                     | 181   |
| <b>12.</b> | Adalimumab OR Humira                                                                                                                                                     | 395   |
| <b>13.</b> | Golimumab OR Simponi                                                                                                                                                     | 69    |
| <b>14.</b> | Onercept OR Etanercept                                                                                                                                                   | 599   |
| <b>15.</b> | #8 OR #9 OR #10 OR #11 OR #12 OR #13 OR #14                                                                                                                              | 2463  |
| <b>16.</b> | 'Treatment pathways' or 'treatment sequence' or 'treatment switch'                                                                                                       | 15032 |
| <b>17.</b> | 'treatment patterns' or 'treatment paradigm'                                                                                                                             | 10730 |



|     |                                                                                                                                                                                                                                                                                                                  |        |
|-----|------------------------------------------------------------------------------------------------------------------------------------------------------------------------------------------------------------------------------------------------------------------------------------------------------------------|--------|
| 18. | MeSH descriptor: [Treatment Failure] explode all trees                                                                                                                                                                                                                                                           | 2540   |
| 19. | 'treatment failure' or 'TNF cycling' OR 'TNF failure'                                                                                                                                                                                                                                                            | 27261  |
| 20. | 'Dose escalation' OR de-intensification OR 'medical diagnosis' OR 'prior treatments' OR 'previous treatments'                                                                                                                                                                                                    | 53899  |
| 21. | MeSH descriptor: [Costs and Cost Analysis] explode all trees                                                                                                                                                                                                                                                     | 20266  |
| 22. | MeSH descriptor: [Quality of Life] explode all trees                                                                                                                                                                                                                                                             | 13023  |
| 23. | cost OR 'health care cost' OR 'cost of illness' OR 'direct costs' OR 'indirect costs'                                                                                                                                                                                                                            | 47688  |
| 24. | 'quality of life' OR QoL:ti,ab,kw                                                                                                                                                                                                                                                                                | 27659  |
| 25. | hospitalization OR employment OR productivity                                                                                                                                                                                                                                                                    | 19331  |
| 26. | #16 OR #17 OR #18 OR #19 OR #20 OR #21 OR #22 OR #23 OR #24 OR #25                                                                                                                                                                                                                                               | 139164 |
| 27. | #7 AND #15 AND #26                                                                                                                                                                                                                                                                                               | 229    |
| 28. | austria OR belgium OR denmark OR finland OR france OR germany OR greece OR ireland OR italy OR Luxembourg OR luxemberg OR netherlands OR portugal OR spain OR sweden OR 'united kingdom' OR england OR wales OR Scotland OR canada OR australia OR 'new Zealand OR mexico OR russia OR brazil OR 'united states' | 202026 |
| 29. | #27 AND #28                                                                                                                                                                                                                                                                                                      | 131    |

### B.3 NHSEED

Total number of hits: 40
