# Supplementary material for: Characterizing unmet medical need and the potential role of new biologic treatment options in patients with ulcerative colitis and Crohn’s disease: a systematic review and clinician surveys
Source: PubMed Central journal article supplement — Eur J Gastroenterol Hepatol. 2015 Jun 3;27(7):804–12. doi: 10.1097/MEG.0000000000000378 (PMC4892747; doi:10.1097/meg.0000000000000378), 2015-06-03
Supplement: meg-27-804-s003.pdf [file meg-27-804-s003.pdf]

## Supplemental Digital Content 3. Clinician survey: Questionnaires

### Contents

|                                                                                            |    |
|--------------------------------------------------------------------------------------------|----|
| A1. Ulcerative Colitis and Crohn's Disease - UK Physician Research Questionnaire .....     | 2  |
| Section 1 – Information .....                                                              | 3  |
| Section 2 – Patient details.....                                                           | 3  |
| Section 3 – First-line biologic and lack/loss of response .....                            | 4  |
| Section 4 – Second-line treatment and lack/loss of response.....                           | 10 |
| A2. Ulcerative Colitis and Crohn's Disease - FRENCH Physician Research Questionnaire.....  | 14 |
| Rubrique 1 – Informations .....                                                            | 15 |
| Rubrique 2 – Détails sur les patients .....                                                | 15 |
| Rubrique 3 – Traitement biologique de première intention et absence/perte de réponse ..... | 16 |
| Rubrique 4 – Traitement de seconde intention et absence/perte de réponse.....              | 23 |

## A1. Ulcerative Colitis and Crohn's Disease - UK Physician Research Questionnaire

### Survey Background

CSD Health Research invites you to participate in an online survey commissioned by a pharmaceutical company concerning the treatment of ulcerative colitis (UC) and Crohn's disease (CD) with biologic products. In this survey we will be gathering information about the failure rates seen amongst patients treated with biologic products and understanding how these patients are subsequently treated.

The survey will take approximately 30 minutes to complete. All eligible physicians completing the survey will receive £x. Please read the following text, which explains the intent of this research.

In conducting this project, CSD Health Research would like to confirm that:

- We comply with all UK laws protecting your personal data and the British Healthcare Business Intelligence Association and Market Research Society guidelines
- Your responses will be used by us and the sponsoring pharmaceutical company for market research and public relations purposes only
- Your responses will be collated with other respondents and presented to the sponsor in aggregated or anonymised form
- The research is not intended to be promotional and any information presented is done so solely to explore reactions to such information
- Your responses will be confidential and will not be used for any other purposes or disclosed to any third party without your approval.

The ABPI rule 'clause 20', requires us to obtain consent from all healthcare professionals undertaking market research. In order to comply with this rule, we would appreciate it if you would confirm your consent by ticking the box below.

Yes, I consent to participate with the survey on the basis described above >>[Continue](#)

No, I do not consent to participate >>[Close](#)

### Adverse Event Reporting

We are required to pass onto our client details of adverse events that are mentioned during the course of market research surveys. Although this is a market research survey and what you say will, of course, be treated in confidence, should you raise during the survey an adverse event in a specific patient or group of patients, we will need to report this even if it has already been reported by you directly to the company or the regulatory authorities.

In such a situation, you will be asked whether or not you are willing to waive the confidentiality given to you under the Market Research Codes of conduct specifically in relation to that adverse event. Everything else you say during the course of the survey will continue to remain confidential, and you will still have the option to remain anonymous if you so wish.

Are you willing to continue on this basis?

|   |                                                                                                                |  |                                       |
|---|----------------------------------------------------------------------------------------------------------------|--|---------------------------------------|
| 1 | Yes, and give permission to be contacted by the Drug safety department in relation to any adverse event        |  | <b>PROCEED TO SCREENING QUESTIONS</b> |
| 2 | Yes, but do not give permission to be contacted by the Drug safety department in relation to any adverse event |  | <b>PROCEED TO SCREENING QUESTIONS</b> |
| 3 | No                                                                                                             |  | <b>THANK AND CLOSE</b>                |

## Section 1 – Information

**S1) How many patients do you currently treat with biologics for the following:**

*Please write in number*

Ulcerative colitis  
Crohn's disease

*Open numeric for each  
If either line is less than 10 close*

**S2) Which of the following best describes the type of hospital you treat most of your patients is?**

Teaching Hospital  
General Hospital  
District Hospital  
Other (write in)

*Single answer with write in option*

**S3) What would be your estimate of the population served by this hospital**

*Please write in a number or tick don't know if you cannot estimate this figure*

*Open numeric for each  
Add a don't know tick box option*

## Section 2 – Patient details

**Q1) Thinking about your ulcerative colitis and Crohn's disease patients. What proportion of your patients were in the following age bands at the onset of their condition?**

*Please write in %*

|       | Ulcerative colitis | Crohn's disease |
|-------|--------------------|-----------------|
| < 30  |                    |                 |
| 30–60 |                    |                 |
| > 60  |                    |                 |

*Columns must add to 100%*

**Q2) In your experience, what is the typical time lag between onset of disease to first biologic treatment?**

*Please write in number of months*

Ulcerative colitis  
Crohn's disease

*Open numeric answers for both diseases*

**Q3a) How do you typically measure ulcerative colitis severity? / What scores do you use to define mild, moderate and severe disease?**

Please answer as fully as possible

Open ended

**Q3a) And how do you typically measure Crohn's disease severity? / What scores do you use to define mild, moderate and severe disease?**

Please answer as fully as possible

Open ended

**Q4) At the onset of biologic treatment, what proportion of your patients were classified as having**  
Please write in %

|                  | Ulcerative colitis | Crohn's disease |
|------------------|--------------------|-----------------|
| Moderate disease |                    |                 |
| Severe disease   |                    |                 |

Columns **do not** need to add to 100%

### Section 3 – First-line biologic and lack/loss of response

We would now like you to consider those patients with ulcerative colitis or Crohn's disease who have been treated with their first biologic but have experienced:

**Primary Failure:** i.e. a lack of improvement in clinical signs and symptoms during induction therapy leading to discontinuation of a given biologic therapy

**OR**

**Reduced response:** i.e. a loss of response during maintenance therapy, defined as recurrence of disease activity after achieving an appropriate induction response, without immediate discontinuation of a given biologic therapy

**OR**

**Secondary failure:** i.e. a loss of response during maintenance therapy, defined as recurrence of disease activity after achieving an appropriate induction response, leading to discontinuation of a given biologic therapy

**Q5a) Primary failure: What proportion of ulcerative colitis patients show a lack of improvement in clinical signs/symptoms and consequently discontinue therapy during the induction phase, when treated with the following?**

Please write in %

|               | % of patients | Do not use this product |
|---------------|---------------|-------------------------|
| infliximab    |               |                         |
| adalimumab    |               |                         |
| golimumab     |               |                         |
| certolizumab* |               |                         |

Answer must be 100% or less on each line

Respondents must not be able to tick 'do not use' for all lines

**Q5b) Primary failure: Considering the pool of ulcerative colitis patients that show a lack of improvement in clinical signs/symptoms and consequently discontinue therapy during the induction phase, by treatment used, what proportion of those are attributable to the following reasons?**

*Please consider the main reason for any failure – your answer should add up to 100% in each column*

|                              | infixima<br>b | adalimuma<br>b | golimuma<br>b | certolizumab<br>* |
|------------------------------|---------------|----------------|---------------|-------------------|
| Lack of mechanistic response |               |                |               |                   |
| Lack of bioavailability      |               |                |               |                   |
| Lack of adherence            |               |                |               |                   |
| Disease severity             |               |                |               |                   |
| Other (Please specify)       |               |                |               |                   |

Each column must add to 100%

Suppress any columns where 'do not use' selected at previous question

**Q5c) Primary failure: What proportion of Crohn's disease patients show a lack of improvement in clinical signs/symptoms and consequently discontinue therapy during the induction phase, when treated with the following?**

*Please write in %*

|               | % of patients | Do not use this product |
|---------------|---------------|-------------------------|
| infiximab     |               |                         |
| adalimumab    |               |                         |
| certolizomab* |               |                         |

Answer must be 100% or less on each line

Respondents must not be able to tick 'do not use' for all lines

**Q5d) Primary failure: Considering the pool of Crohn's disease patients that show a lack of improvement in clinical signs/symptoms and consequently discontinue therapy during the induction phase, by treatment used, what proportion of those are attributable to the following reasons?**

*Please consider the main reason for any failure – your answer should add up to 100% in each column*

|                              | infixima<br>b | adalimuma<br>b | certolizomab<br>* |
|------------------------------|---------------|----------------|-------------------|
| Lack of mechanistic response |               |                |                   |
| Lack of bioavailability      |               |                |                   |
| Lack of adherence            |               |                |                   |
| Disease severity             |               |                |                   |
| Other (Please specify)       |               |                |                   |

Each column must add to 100%

Suppress any columns where 'do not use' selected at question 5a

**Q6a) Secondary failure: What proportion of ulcerative colitis patients lose response and consequently discontinue therapy during the maintenance phase, when treated with the following?**

*Please write in %*

|               | % of patients |
|---------------|---------------|
| infliximab    |               |
| adalimumab    |               |
| golimumab     |               |
| certolizumab* |               |

Answer must be 100% or less on each line

Suppress any rows where 'do not use' selected at Q5a

**Q6b) Secondary failure: Considering the pool of ulcerative colitis patients that have lost response and consequently discontinue therapy during the maintenance phase, by treatment used, what proportion fail in the following time frames?**

*Please write in %*

|                        | infliximab | adalimumab | golimumab | certolizumab* |
|------------------------|------------|------------|-----------|---------------|
| 0 to ≤ 3 months        |            |            |           |               |
| 3 to ≤ 6 months        |            |            |           |               |
| > 6 months to ≤ 1 year |            |            |           |               |
| > 1 to ≤ 2 years       |            |            |           |               |
| > 2 to ≤ 3 years       |            |            |           |               |
| > 3 to ≤ 4 years       |            |            |           |               |
| > 4 to ≤ 5 years       |            |            |           |               |
| > 5 years              |            |            |           |               |

Answer in each column must add to 100%

Suppress any columns where 'do not use' selected at Q5a

**Q6c) Secondary failure: What proportion of Crohn's disease patients lose response and consequently discontinue therapy during the maintenance phase, when treated with the following?**

|               | % of patients |
|---------------|---------------|
| infliximab    |               |
| adalimumab    |               |
| certolizomab* |               |

Answer must be 100% or less on each line

Suppress any rows where 'do not use' selected at Q5c

**Q6d) Secondary failure: Considering the pool of Crohn's disease patients that have lost response and consequently discontinue therapy during the maintenance phase, by treatment used, what proportion fail in the following time frames?**

*Please write in %*

|                        | infliximab | adalimumab | certolizomab* |
|------------------------|------------|------------|---------------|
| 0 to ≤ 3 months        |            |            |               |
| 3 to ≤ 6 months        |            |            |               |
| > 6 months to ≤ 1 year |            |            |               |
| > 1 to ≤ 2 years       |            |            |               |
| > 2 to ≤ 3 years       |            |            |               |

|                  |  |  |  |
|------------------|--|--|--|
| > 3 to ≤ 4 years |  |  |  |
| > 4 to ≤ 5 years |  |  |  |
| > 5 years        |  |  |  |

Answer in each column must add to 100%

Suppress any columns where 'do not use' selected at Q5c

**Q7a) Secondary failure: Which of the following, in your experience, are the predominant reasons why ulcerative colitis patients lose response and consequently discontinue therapy during the maintenance phase, according to treatment used?**

*Please tick all that apply*

|                                    | infliximab | adalimuma<br>b | golimuma<br>b | certolizuma<br>b* |
|------------------------------------|------------|----------------|---------------|-------------------|
| Shift in mechanism of inflammation |            |                |               |                   |
| Immunogenicity                     |            |                |               |                   |
| Lack of bioavailability            |            |                |               |                   |
| Severity of disease                |            |                |               |                   |
| Lack of adherence                  |            |                |               |                   |
| Increasing comorbidities           |            |                |               |                   |
| Other                              |            |                |               |                   |

Multiple answers allowed

Suppress any columns where 'do not use' selected at Q5a

**Q7b) Secondary failure: Which of the following, in your experience, are the predominant reasons why Crohn's disease patients lose response and consequently discontinue therapy during the maintenance phase, according to treatment used?**

*Please tick all that apply*

|                                    | infliximab | adalimuma<br>b | certolizomab<br>* |
|------------------------------------|------------|----------------|-------------------|
| Shift in mechanism of inflammation |            |                |                   |
| Immunogenicity                     |            |                |                   |
| Lack of bioavailability            |            |                |                   |
| Severity of disease                |            |                |                   |
| Lack of adherence                  |            |                |                   |
| Increasing comorbidities           |            |                |                   |
| Other                              |            |                |                   |

Multiple answers allowed

Suppress any columns where 'do not use' selected at Q5c

**Q8a) In response to 'reduced response' or 'failure' to the first-line biologic, in what proportion of ulcerative colitis patients would you**

*Please write in %*

|  | infliximab | adalimuma<br>b | golimumab | certolizumab<br>* |
|--|------------|----------------|-----------|-------------------|
|  |            |                |           |                   |

|                                                                                       |  |  |  |  |
|---------------------------------------------------------------------------------------|--|--|--|--|
| Add another treatment (e.g. corticosteroids, immunosuppressants, excluding biologics) |  |  |  |  |
| Increase biologic dose                                                                |  |  |  |  |
| Increase frequency of biologic administration                                         |  |  |  |  |
| Switch to another biologic                                                            |  |  |  |  |
| Offer surgery                                                                         |  |  |  |  |
| Other (please write in)                                                               |  |  |  |  |

Suppress any columns where 'no experience' selected at Q5a

Where 'undergo dose escalation' >0 ask Q8b

Where 'Increase dose frequency' > 0 ask Q8c

If both >0 ask both Q8b and Q8c

Where 'Switch to another biologic' and/or 'Offer surgery' > 0 ask Q9a

**Q8b) Where you would escalate the dose for ulcerative colitis patients following 'reduced response' to the first-line biologic, please tell us the dose (including the unit) you typically start at and the dose (including the unit) you typically escalate to**

Please write in dose

|               | infliximab |      | adalimumab |      | golimumab |      | certolizumab * |      |
|---------------|------------|------|------------|------|-----------|------|----------------|------|
|               | Dose       | Unit | Dose       | Unit | Dose      | Unit | Dose           | Unit |
| From (units): |            |      |            |      |           |      |                |      |
| To (units):   |            |      |            |      |           |      |                |      |

Dose = Open numeric

Unit = text

Suppress any columns where 'do not use' selected at question 5a

**Q8c) Where you would increase dose frequency for ulcerative colitis patients following 'reduced response' to the first-line biologic, please tell us the frequency you typically start at as X doses/X weeks and the frequency you typically increase to**

Please write time in weeks

|                     | infliximab |                | adalimumab |                | golimumab  |                | certolizumab * |                |
|---------------------|------------|----------------|------------|----------------|------------|----------------|----------------|----------------|
|                     | # of doses | Per # of weeks | # of doses | Per # of weeks | # of doses | Per # of weeks | # of doses     | Per # of weeks |
| From (doses/weeks): |            |                |            |                |            |                |                |                |
| To (doses/weeks):   |            |                |            |                |            |                |                |                |

Open numeric

Suppress any columns where 'do not use' selected at question 5a



**Q8d) On average, for ulcerative colitis patients, how many times would you attempt dose optimisation (i.e. increase dose or dose frequency) with the same biologic before switching?**

*Please write in number of times*

|               | Number of times |
|---------------|-----------------|
| infliximab    |                 |
| adalimumab    |                 |
| golimumab     |                 |
| certolizomab* |                 |

*Open numeric*

Suppress any rows where 'do not use' selected at question 5a

**Q8e) In response to 'reduced response' or 'failure' to the first-line biologic, in what proportion of Crohn's disease patients would you**

*Please write in %*

|                                                                                       | infliximab | adalimumab | certolizumab* |
|---------------------------------------------------------------------------------------|------------|------------|---------------|
| Add another treatment (e.g. corticosteroids, immunosuppressants, excluding biologics) |            |            |               |
| Increase biologic dose                                                                |            |            |               |
| Increase frequency of biologic administration                                         |            |            |               |
| Switch to another biologic                                                            |            |            |               |
| Offer surgery                                                                         |            |            |               |
| Other (please write in)                                                               |            |            |               |

Suppress any columns where 'do not use' selected at Q5c

Where 'undergo dose escalation' > 0 ask Q8f

Where 'Increase dose frequency' > 0 ask Q8g

If both > 0 ask both Q8f and Q8g

Where 'Switch to another biologic' and/or 'Offer surgery' > 0 ask Q9b

**Q8f) Where you would escalate the dose for Crohn's disease patients following 'reduced response' to the first-line biologic, please tell us the dose you typically start at and the dose (including the unit) you typically escalate to**

*Please write in dose*

|               | infliximab |      | adalimumab |      | certolizumab* |      |
|---------------|------------|------|------------|------|---------------|------|
|               | Dose       | unit | Dose       | unit | Dose          | unit |
| From (units): |            |      |            |      |               |      |
| To (units):   |            |      |            |      |               |      |

Open numeric

Suppress any columns where 'do not use' selected at Q5c

**Q8g) Where you would increase dose frequency for Crohn's disease patients following 'reduced response' to the first-line biologic, please tell us the frequency you typically start at as X doses/X weeks and the frequency you typically increase to**

*Please write time in weeks*

|                     | infliximab |                | adalimumab |                | certolizumab* |                |
|---------------------|------------|----------------|------------|----------------|---------------|----------------|
|                     | # of doses | Per # of weeks | # of doses | Per # of weeks | # of doses    | Per # of weeks |
| From (doses/weeks): |            |                |            |                |               |                |
| To (doses/weeks):   |            |                |            |                |               |                |

Open numeric

Suppress any columns where 'do not use' selected at Q5c

**Q8h) On average, for Crohn's disease patients, how many times would you attempt dose optimisation (i.e. increase dose or dose frequency) with the same biologic before switching?**

*Please write in number of times*

|               | Number of times |
|---------------|-----------------|
| infliximab    |                 |
| adalimumab    |                 |
| certolizumab* |                 |

Open numeric

Suppress any rows where 'do not use' selected at Q5c

#### Section 4 – Second-line treatment and lack/loss of response

**Q9a) Where you would discontinue first-line biologic treatment and switch to a second-line treatment, what proportion of ulcerative colitis patients will switch between the following:**

*Please consider the first-line treatment listed in the FROM column and indicate your preferred switch options for patients failing first-line biologic therapy in the TO columns.*

*Each row must add to 100%*

| FROM          | TO         |            |           |               |         |
|---------------|------------|------------|-----------|---------------|---------|
|               | infliximab | adalimumab | golimumab | certolizumab* | Surgery |
| infliximab    | -          |            |           |               |         |
| adalimumab    |            | -          |           |               |         |
| golimumab     |            |            | -         |               |         |
| certolizumab* |            |            |           | -             |         |

Rows must add to 100%.

Suppress any columns where 'do not use' selected at Q5a

**Q9b) Where you would discontinue first-line biologic treatment and switch to a second-line treatment, what proportion of Crohn's disease patients will switch between the following:**

Please consider the first line treatment listed in the FROM column and indicate your preferred switch options for patients failing anti-TNF therapy in the TO columns.  
Each row must add to 100%

| FROM          | TO         |            |               |         |
|---------------|------------|------------|---------------|---------|
|               | infliximab | adalimumab | certolizomab* | Surgery |
| infliximab    | -          |            |               |         |
| adalimumab    |            | -          |               |         |
| certolizomab* |            |            | -             |         |

Rows must add to 100%.

Suppress any rows where 'do not use' selected at Q5c

**Q10a) In ulcerative colitis patients that have switched to a second-line biologic following failure of the first-line biologic, how many will experience primary failure to the second biologic?**

|               | % of patients |
|---------------|---------------|
| infliximab    |               |
| adalimumab    |               |
| golimumab     |               |
| certolizumab* |               |

% must be 100% or less

Suppress any rows where 'do not use' selected at Q5a

**Q10b) In ulcerative colitis patients that have switched to a second-line biologic following failure of the first-line biologic, how many will experience secondary failure to the second biologic?**

|               | % of patients |
|---------------|---------------|
| infliximab    |               |
| adalimumab    |               |
| golimumab     |               |
| certolizumab* |               |

% must be 100% or less

Suppress any rows where 'do not use' selected at Q5a

**Q10c) Secondary failure: For ulcerative colitis patients treated with a second biologic to which they have lost response and consequently discontinue therapy during the maintenance phase, by treatment used, what proportion fail in the following time frames?**

Please write in %

|                        | Second biologic |            |           |               |
|------------------------|-----------------|------------|-----------|---------------|
|                        | infliximab      | adalimumab | golimumab | certolizumab* |
| 0 to ≤ 3 months        |                 |            |           |               |
| > 3 to ≤ 6 months      |                 |            |           |               |
| > 6 months to ≤ 1 year |                 |            |           |               |
| > 1 to ≤ 2 years       |                 |            |           |               |

|                  |  |  |  |  |
|------------------|--|--|--|--|
| > 2 to ≤ 3 years |  |  |  |  |
| > 3 to ≤ 4 years |  |  |  |  |
| > 4 to ≤ 5 years |  |  |  |  |
| > 5 years        |  |  |  |  |

Answer in each column must add to 100%

Suppress any columns where 'do not use' selected at Q5a

**Q10d) In Crohn's disease patients that have switched to a second-line biologic following failure of the first-line biologic, how many will experience primary failure to the second biologic?**

Please write in %

|               | % of patients |
|---------------|---------------|
| infliximab    |               |
| adalimumab    |               |
| certolizomab* |               |

Answer must be 100% or less on each line

Suppress any rows where 'do not use' selected at Q5c

**Q10e) In Crohn's disease patients that have switched to a second-line biologic following failure of the first-line biologic, how many will experience secondary failure to the second biologic?**

Please write in %

|               | % of patients |
|---------------|---------------|
| infliximab    |               |
| adalimumab    |               |
| certolizomab* |               |

Answer must be 100% or less on each line

Suppress any rows where 'do not use' selected at Q5c

**Q10f) Secondary failure: For Crohn's disease patients treated with a second biologic to which they have lost response and consequently discontinue therapy during the maintenance phase, by treatment used, what proportion fail in the following time frames?**

Please write in %

|                        | Second biologic |                |                   |
|------------------------|-----------------|----------------|-------------------|
|                        | infliximab      | adalimuma<br>b | certolizoma<br>b* |
| 0 to ≤ 3 months        |                 |                |                   |
| > 3 to ≤ 6 months      |                 |                |                   |
| > 6 months to ≤ 1 year |                 |                |                   |
| > 1 to ≤ 2 years       |                 |                |                   |
| > 2 to ≤ 3 years       |                 |                |                   |
| > 3 to ≤ 4 years       |                 |                |                   |
| > 4 to ≤ 5 years       |                 |                |                   |
| > 5 years              |                 |                |                   |

Answer in each column must add to 100%

Suppress any columns where 'do not use' selected at Q5c

\* certolizumab would be used off-label in this population

## A2. Ulcerative Colitis and Crohn's Disease - FRENCH Physician Research Questionnaire

### Contexte

Cegedim Strategic Data vous invite à participer à une enquête en ligne commandée par un laboratoire pharmaceutique sur le traitement de la rectocolite hémorragique (RCH) et celui de maladie de Crohn (MC) par des biothérapies. Cette enquête est destinée à réunir des informations sur les taux d'échec observés chez les patients traités par les biothérapies et à mieux comprendre comment ces patients sont traités par la suite.

L'enquête devrait prendre environ 30 minutes. Tous les médecins éligibles qui répondront de manière complète à l'enquête recevront la somme de x €. Veuillez prendre connaissance du le texte qui suit, expliquant le but de cette étude.

Pour la conduite de ce projet, Cegedim Strategic Data tient à confirmer que :

- Nous nous conformons à toutes les lois et Codes de Conduite des études de marché qui protègent les données à caractère personnel vous concernant.
- Vos réponses ne seront utilisées par le laboratoire pharmaceutique et nous-mêmes qu'à des fins d'étude de marché et de relations publiques.
- Vos réponses seront rassemblées avec celles d'autres personnes répondant à l'enquête et présentées sous forme consolidée ou de manière anonyme.
- La présente enquête n'est pas destinée à des fins promotionnelles et toutes les informations présentées le sont uniquement afin d'étudier les réactions à ces informations.
- Vos réponses seront confidentielles et ne seront pas utilisées à d'autres fins ou divulguées à des tiers sans votre approbation.

Nous nous devons d'obtenir le consentement de tous les professionnels de santé prenant part à une étude de marché. Afin d'être en conformité avec cette règle, nous vous serions reconnaissants de bien vouloir confirmer votre consentement en cochant la case ci-dessous.

- Oui, je consens à participer à l'enquête sur la base décrite ci-dessus. >>Continue
- Non, je ne consens pas à participer. >>Close

### Notification des évènements indésirables

Nous sommes tenus de communiquer à notre client les détails sur les évènements indésirables mentionnés au cours des études de marché. Bien qu'il s'agisse d'une étude de marché et que ce que vous direz sera bien entendu, traité de manière confidentielle, s'il vous arrivait, au cours de cette enquête, de mentionner un évènement indésirable chez un patient ou un groupe de patients particulier, nous devrions le notifier même si vous l'avez déjà directement signalé au laboratoire ou aux autorités réglementaires.

Si cette situation devait se présenter, nous vous demanderions si vous êtes disposé à lever la confidentialité qui vous est accordée au titre des codes de conduite des études de marché pour ce qui concerne cet évènement indésirable. Hormis ce qui concerne cet évènement indésirable, tout ce que vous direz au cours de l'enquête restera confidentiel et vous aurez toujours la possibilité de garder l'anonymat si vous le souhaitez.

Êtes-vous disposé à continuer sur cette base ?

|   |                                                                                                        |  |                                             |
|---|--------------------------------------------------------------------------------------------------------|--|---------------------------------------------|
| 1 | Oui, et je donne la permission d'être contacté pour ce qui concerne un éventuel évènement indésirable. |  | CONTINUER AVEC LES<br>QUESTIONS DE SCREENER |
| 2 | Oui, mais je ne donne pas la permission d'être contacté                                                |  | CONTINUER AVEC LES                          |

|   |                                                         |  |                       |
|---|---------------------------------------------------------|--|-----------------------|
|   | pour ce qui concerne un éventuel évènement indésirable. |  | QUESTIONS DE SCREENER |
| 3 | Non.                                                    |  | REMERCIER ET CLORE    |

### Rubrique 1 – Informations

#### S1) Combien de patients traitez-vous actuellement avec des biothérapies / traitements biologiques pour les affections suivantes :

*Indiquez un nombre.*

Rectocolite hémorragique  
Maladie de Crohn

*Open numeric for each*

*If either line is less than 10 close (revised 5UC/10CD)*

#### S2) Parmi les types d'hôpitaux suivants, quel est celui dans lequel vous traitez la plupart de vos patients ?

Hôpital universitaire (CHU)  
Hôpital général (CHG)  
Hôpital régional (CHR) / inter-communal (CHI)  
Autre (précisez)

*Single answer with write in option*

#### S3) À combien de personnes estimez-vous la population desservie par cet établissement?

*Indiquez un chiffre ou cochez « je ne sais pas. » si vous n'arrivez pas à estimer ce chiffre.*

*Open numeric for each*

*Add a don't know tick box option*

### Rubrique 2 – Détails sur les patients

#### Q1) Quelle proportion de vos patients atteints de rectocolite hémorragique et de la maladie de Crohn se situaient dans les groupes d'âge suivants lors du diagnostic de leur maladie ?

*Indiquez un pourcentage.*

|         | Rectocolite hémorragique | Maladie de Crohn |
|---------|--------------------------|------------------|
| < 30    |                          |                  |
| 30 à 60 |                          |                  |
| > 60    |                          |                  |

*Columns must add to 100%*

#### Q2) Selon votre expérience, quel est le délai moyen entre le diagnostic de la maladie et l'initiation du premier traitement biologique ?

*Indiquez un nombre de mois.*

Rectocolite hémorragique  
Maladie de Crohn

Open numeric answers for both diseases

**Q3a) De quelle manière mesurez-vous généralement la sévérité de la rectocolite hémorragique ? / Quel(s) score(s) utilisez-vous pour définir une maladie à forme légère, modérée et sévère ?**

Répondez de manière aussi exhaustive que possible.

Open ended

**Q3b) Et de quelle manière mesurez-vous généralement la sévérité de la maladie de Crohn ? / Quel(s) score(s) utilisez-vous pour définir une à forme maladie légère, modérée et sévère ?**

Répondez de manière aussi exhaustive que possible.

Open ended

**Q4) A l'Initiation du traitement biologique, quelle proportion de vos patients étaient classés comme ayant une :**

Indiquez un pourcentage.

|                         | Rectocolite hémorragique | Maladie de Crohn |
|-------------------------|--------------------------|------------------|
| Maladie à forme modérée |                          |                  |
| Maladie à forme sévère  |                          |                  |

Columns **do not** need to add to 100%

### Rubrique 3 – Traitement biologique de première intention et absence/perte de réponse

Nous souhaiterions maintenant que vous preniez en considération les patients atteints de rectocolite hémorragique ou de maladie de Crohn qui ont été traités avec leur premier traitement biologique mais ont fait l'expérience d'un(e) :

**Échec primaire** : à savoir une absence d'amélioration des signes et des symptômes cliniques pendant le traitement d'induction, conduisant à l'arrêt du traitement biologique administré .

**OU**

**Réponse réduite/ échappement thérapeutique** : à savoir une perte de réponse pendant le traitement d'entretien, définie comme la récurrence de la maladie après obtention d'une réponse adéquate à l'induction, sans arrêt immédiat du traitement biologique administré.

**OU**

**Échec secondaire** : à savoir une perte de réponse pendant le traitement d'entretien, définie comme la récurrence de la maladie après obtention d'une réponse adéquate à l'induction, conduisant à l'arrêt du traitement biologique administré

**Q5a) Échec primaire : Quelle proportion de patients atteints de rectocolite hémorragique présentent une absence d'amélioration des signes/symptômes cliniques et arrêtent par conséquent le traitement pendant la phase d'induction, lorsqu'ils sont traités avec l'un des médicaments suivants ?**

Indiquez un pourcentage.

|                       | % de patients | N'utilise pas ce médicaments |
|-----------------------|---------------|------------------------------|
| Remicade (infliximab) |               |                              |
| Humira (adalimumab)   |               |                              |



|                        |  |  |
|------------------------|--|--|
| Simponi (golimumab)    |  |  |
| Cimzia (certolizumab)* |  |  |

Answer must be 100% or less on each line

Respondents must not be able to tick 'do not use' for all lines

**Q5b) Échec primaire : Parmi l'ensemble des patients atteints de rectocolite hémorragique présentant une absence d'amélioration des signes/symptômes cliniques et arrêtant par conséquent le traitement pendant la phase d'induction, par traitement utilisé, quelle proportion peut-on attribuer aux raisons suivantes ?**

*Pensez à la raison principale de chaque échec – le total de vos réponses doit être de 100 % dans chaque colonne.*

|                                         | Remicade (influximab) | Humira (adalimumab) | Simponi (golimumab) | Cimzia (certolizumab)* |
|-----------------------------------------|-----------------------|---------------------|---------------------|------------------------|
| Manque de réponse symptomatique         |                       |                     |                     |                        |
| Mauvaise qualité de la biodisponibilité |                       |                     |                     |                        |
| Manque d'observance                     |                       |                     |                     |                        |
| Sévérité de la maladie                  |                       |                     |                     |                        |
| Autre (précisez)                        |                       |                     |                     |                        |

Each column must add to 100%

Suppress any columns where 'do not use' selected at previous question

**Q5c) Échec primaire : Quelle proportion de patients atteints de maladie de Crohn présentent une absence d'amélioration des signes/symptômes cliniques et arrêtent par conséquent le traitement pendant la phase d'induction, lorsqu'ils sont traités avec l'un des médicaments suivants ?**

*Indiquez un pourcentage.*

|                        | % de patients | N'utilise pas ce médicaments |
|------------------------|---------------|------------------------------|
| Remicade (influximab)  |               |                              |
| Humira (adalimumab)    |               |                              |
| Simponi (golimumab)*   |               |                              |
| Cimzia (certolizumab)* |               |                              |

Answer must be 100% or less on each line

Respondents must not be able to tick 'do not use' for all lines

**Q5d) Échec primaire : Parmi l'ensemble des patients atteints de maladie de Crohn présentant une absence d'amélioration des signes/symptômes cliniques et arrêtant par conséquent le traitement pendant la phase d'induction, par traitement utilisé, quelle proportion peut-on attribuer aux raisons suivantes ?**

*Pensez à la raison principale de chaque échec – le total de vos réponses doit être de 100 % dans chaque colonne.*

|                                 | Remicade (influximab) | Humira (adalimumab) | Simponi (golimumab)* | Cimzia (certolizumab)* |
|---------------------------------|-----------------------|---------------------|----------------------|------------------------|
| Manque de réponse symptomatique |                       |                     |                      |                        |

|                                         |  |  |  |  |
|-----------------------------------------|--|--|--|--|
| Mauvaise qualité de la biodisponibilité |  |  |  |  |
| Manque d'observance                     |  |  |  |  |
| Sévérité de la maladie                  |  |  |  |  |
| Autre (précisez)                        |  |  |  |  |

Each column must add to 100%

Suppress any columns where 'do not use' selected at question 5a

**Q6a) Échec secondaire : Quelle proportion de patients atteints de rectocolite hémorragique présentent une perte de réponse et arrêtent par conséquent le traitement pendant la phase d'entretien, lorsqu'ils sont traités avec l'un des médicaments suivants ?**

*Indiquez un pourcentage.*

|                        | % de patients |
|------------------------|---------------|
| Remicade (infliximab)  |               |
| Humira (adalimumab)    |               |
| Simponi (golimumab)    |               |
| Cimzia (certolizumab*) |               |

Answer must be 100% or less on each line

Suppress any rows where 'do not use' selected at Q5a

**Q6b) Échec secondaire : Parmi l'ensemble des patients atteints de rectocolite hémorragique présentant une perte de réponse et arrêtant par conséquent le traitement pendant la phase d'entretien, par traitement utilisé, quelle proportion connaît un échec dans les délais suivants ?**

*Indiquez un pourcentage.*

|                   | Remicade (infliximab) | Humira (adalimumab) | Simponi (golimumab) | Cimzia (certolizumab)* |
|-------------------|-----------------------|---------------------|---------------------|------------------------|
| 0 à ≤ 3 mois      |                       |                     |                     |                        |
| 3 à ≤ 6 mois      |                       |                     |                     |                        |
| > 6 mois à ≤ 1 an |                       |                     |                     |                        |
| > 1 à ≤ 2 ans     |                       |                     |                     |                        |
| > 2 à ≤ 3 ans     |                       |                     |                     |                        |
| > 3 à ≤ 4 ans     |                       |                     |                     |                        |
| > 4 à ≤ 5 ans     |                       |                     |                     |                        |
| > 5 ans           |                       |                     |                     |                        |

Answer in each column must add to 100%

Suppress any columns where 'do not use' selected at Q5a

**Q6c) Échec secondaire : Quelle proportion de patients atteints de maladie de Crohn présentent une perte de réponse et arrêtent par conséquent le traitement pendant la phase d'entretien, lorsqu'ils sont traités avec l'un des médicaments suivants ?**

|                        | % de patients |
|------------------------|---------------|
| Remicade (infliximab)  |               |
| Humira (adalimumab)    |               |
| Simponi (golimumab)*   |               |
| Cimzia (certolizumab)* |               |

Answer must be 100% or less on each line

Suppress any rows where 'do not use' selected at Q5c

**Q6d) Échec secondaire : Parmi l'ensemble des patients atteints de maladie de Crohn présentant une perte de réponse et arrêtant par conséquent le traitement pendant la phase d'entretien, par traitement utilisé, quelle proportion connaît un échec dans les délais suivants ?**

*Indiquez un pourcentage.*

|                   | Remicade<br>(infliximab) | Humira<br>(adalimumab) | Simponi<br>(golimumab)* | Cimzia<br>(certolizumab)* |
|-------------------|--------------------------|------------------------|-------------------------|---------------------------|
| 0 à ≤ 3 mois      |                          |                        |                         |                           |
| 3 à ≤ 6 mois      |                          |                        |                         |                           |
| > 6 mois à ≤ 1 an |                          |                        |                         |                           |
| > 1 à ≤ 2 ans     |                          |                        |                         |                           |
| > 2 à ≤ 3 ans     |                          |                        |                         |                           |
| > 3 à ≤ 4 ans     |                          |                        |                         |                           |
| > 4 à ≤ 5 ans     |                          |                        |                         |                           |
| > 5 ans           |                          |                        |                         |                           |

Answer in each column must add to 100%

Suppress any columns where 'do not use' selected at Q5c

**Q7a) Échec secondaire : D'après votre expérience, parmi les propositions suivantes, quelles sont les raisons prédominantes pour lesquelles les patients atteints de rectocolite hémorragique présentent une perte de réponse et arrêtent par conséquent le traitement pendant la phase d'entretien, selon le traitement utilisé ?**

*Cochez toutes les réponses applicables.*

|                                       | Remicade<br>(infliximab<br>) | Humira<br>(adalimumab<br>) | Simponi<br>(golimumab<br>) | Cimzia<br>(certolizumab<br>)<br>* |
|---------------------------------------|------------------------------|----------------------------|----------------------------|-----------------------------------|
| Changement du mécanisme inflammatoire |                              |                            |                            |                                   |
| Immunogénicité                        |                              |                            |                            |                                   |
| Manque de biodisponibilité            |                              |                            |                            |                                   |
| Sévérité de la maladie                |                              |                            |                            |                                   |
| Manque d'adhésion                     |                              |                            |                            |                                   |
| Augmentation des comorbidités         |                              |                            |                            |                                   |
| Autre                                 |                              |                            |                            |                                   |

Multiple answers allowed

Suppress any columns where 'do not use' selected at Q5a

**Q7b) Échec secondaire : D'après votre expérience, parmi les propositions suivantes, quelles sont les raisons prédominantes pour lesquelles les patients atteints de maladie de Crohn présentent une perte de réponse et arrêtent par conséquent le traitement pendant la phase d'entretien, selon le traitement utilisé ?**

*Cochez toutes les réponses applicables.*

|  | Remicade<br>(infliximab<br>) | Humira<br>(adalimumab<br>) | Simponi<br>(golimumab)* | Cimzia<br>(certolizumab<br>)<br>* |
|--|------------------------------|----------------------------|-------------------------|-----------------------------------|
|  |                              |                            |                         |                                   |



*Dose = Open numeric*

*Unit = text*

*Suppress any columns where 'do not use' selected at question 5a*

**Q8c) Chez les patients atteints de rectocolite hémorragique pour lesquels vous augmenteriez la fréquence d'administration suite à une « réponse réduite » au traitement biologique de première intention, veuillez indiquer, sous la forme X doses/X semaines, la fréquence à laquelle vous débiteriez généralement le traitement et la fréquence à laquelle vous passeriez ensuite.**

*Indiquez le temps en semaines.*

|                       | Remicade (infliximab) |                      | Humira (adalimumab) |                      | Simponi (golimumab) |                      | Cimzia (certolizumab)* |                      |
|-----------------------|-----------------------|----------------------|---------------------|----------------------|---------------------|----------------------|------------------------|----------------------|
|                       | Nbre de doses         | Par nbre de semaines | Nbre de doses       | Par nbre de semaines | Nbre de doses       | Par nbre de semaines | Nbre de doses          | Par nbre de semaines |
| De (doses/semaines) : |                       |                      |                     |                      |                     |                      |                        |                      |
| À (doses/semaines) :  |                       |                      |                     |                      |                     |                      |                        |                      |

*Open numeric*

*Suppress any columns where 'do not use' selected at question 5a*

**Q8d) En moyenne, pour les patients atteints de rectocolite hémorragique, combien de fois tenteriez-vous une optimisation de la dose (à savoir une augmentation de la dose ou de la fréquence des doses) avec le même traitement biologique avant d'en changer ?**

*Indiquez le nombre de fois.*

|                        | Nombre de fois |
|------------------------|----------------|
| Remicade (infliximab)  |                |
| Humira (adalimumab)    |                |
| Simponi (golimumab)    |                |
| Cimzia (certolizumab)* |                |

*Open numeric*

*Suppress any rows where 'do not use' selected at question 5a*

**Q8e) Face à une « réponse réduite » ou à un « échec » au traitement biologique de première intention, quelle est la proportion de patients atteints de maladie de Crohn pour lesquels vous adopteriez l'une des mesures suivantes ?**

*Indiquez un pourcentage.*

|                                                                                                                          | Remicade (infliximab) | Humira (adalimumab) | Simponi (golimumab)* | Cimzia (certolizumab)* |
|--------------------------------------------------------------------------------------------------------------------------|-----------------------|---------------------|----------------------|------------------------|
| Ajout d'un autre traitement (par ex. des corticoïdes, des immunosuppresseurs, à l'exclusion des traitements biologiques) |                       |                     |                      |                        |
| Augmentation de la dose du traitement biologique                                                                         |                       |                     |                      |                        |
| Augmentation de la fréquence d'administration du traitement biologique                                                   |                       |                     |                      |                        |

|                                                |  |  |  |  |
|------------------------------------------------|--|--|--|--|
| Changement pour un autre traitement biologique |  |  |  |  |
| Proposition d'intervention chirurgicale        |  |  |  |  |
| Autre (précisez)                               |  |  |  |  |

Suppress any columns where 'do not use' selected at Q5c

Where 'undergo dose escalation' >0 ask Q8f

Where 'Increase dose frequency' > 0 ask Q8g

If both >0 ask both Q8f and Q8g

Where 'Switch to another biologic' and/or 'Offer surgery' > 0 ask Q9b

**Q8f) Chez les patients atteints de maladie de Crohn pour lesquels vous augmenteriez la dose suite à une « réponse réduite » au traitement biologique de première intention, veuillez indiquer la dose à laquelle vous débiteriez généralement le traitement et la dose (y compris l'unité) à laquelle vous passeriez ensuite.**

Indiquez une dose.

|               | Remicade (infliximab) |       | Humira (adalimumab) |       | Simponi (golimumab)* |       | Cimzia (certolizumab)* |       |
|---------------|-----------------------|-------|---------------------|-------|----------------------|-------|------------------------|-------|
|               | Dose                  | Unité | Dose                | Unité | Dose                 | Unité | Dose                   | Unité |
| De (unités) : |                       |       |                     |       |                      |       |                        |       |
| À (unités) :  |                       |       |                     |       |                      |       |                        |       |

Open numeric

Suppress any columns where 'do not use' selected at Q5c

**Q8g) Chez les patients atteints de maladie de Crohn pour lesquels vous augmenteriez la fréquence d'administration suite à une « réponse réduite » au traitement biologique de première intention, veuillez nous indiquer, sous la forme X doses/X semaines, la fréquence à laquelle vous débiteriez généralement le traitement et la fréquence à laquelle vous passeriez ensuite.**

Indiquez le temps en semaines.

|                       | Remicade (infliximab) |                      | Humira (adalimumab) |                      | Simponi (golimumab)* |                      | Cimzia (certolizumab)* |                      |
|-----------------------|-----------------------|----------------------|---------------------|----------------------|----------------------|----------------------|------------------------|----------------------|
|                       | Nbre de doses         | Par nbre de semaines | Nbre de doses       | Par nbre de semaines | Nbre de doses        | Par nbre de semaines | Nbre de doses          | Par nbre de semaines |
| De (doses/semaines) : |                       |                      |                     |                      |                      |                      |                        |                      |
| À (doses/semaines) :  |                       |                      |                     |                      |                      |                      |                        |                      |

Open numeric

Suppress any columns where 'do not use' selected at Q5c

**Q8h) En moyenne, pour les patients atteints de maladie de Crohn, combien de fois tenteriez-vous une optimisation de la dose (à savoir une augmentation de la dose ou de la fréquence d'administration) avec le même traitement biologique avant d'en changer ?**

Indiquez le nombre de fois.

|                       | Nombre de fois |
|-----------------------|----------------|
| Remicade (infliximab) |                |
| Humira (adalimumab)   |                |
| Simponi (golimumab)*  |                |

|                        |  |
|------------------------|--|
| Cimzia (certolizumab)* |  |
|------------------------|--|

Open numeric

Suppress any rows where 'do not use' selected at Q5c

#### Rubrique 4 – Traitement de seconde intention et absence/perte de réponse

**Q9a) Pour les cas où vous arrêteriez le traitement biologique de première intention et changeriez pour un traitement de seconde intention, quelle proportion de patients atteints de rectocolite hémorragique passeraient d'un des traitements suivants à un autre :**

*Choisissez le traitement de première intention dans la liste de la colonne DE et indiquez vos préférences de changement pour les patients présentant un échec au traitement biologique de première intention dans les colonnes À.*

*Le total de chaque ligne doit être de 100 %.*

| DE                     | À                     |                     |                     |                        |           |
|------------------------|-----------------------|---------------------|---------------------|------------------------|-----------|
|                        | Remicade (influximab) | Humira (adalimumab) | Simponi (golimumab) | Cimzia (certolizumab)* | Chirurgie |
| Remicade (influximab)  | -                     |                     |                     |                        |           |
| Humira (adalimumab)    |                       | -                   |                     |                        |           |
| Simponi (golimumab)    |                       |                     | -                   |                        |           |
| Cimzia (certolizumab)* |                       |                     |                     | -                      |           |

Rows must add to 100%.

Suppress any columns where 'do not use' selected at Q5a

**Q9b) Pour les cas où vous arrêteriez le traitement biologique de première intention et changeriez pour un traitement de seconde intention, quelle proportion de patients atteints de maladie de Crohn passeraient d'un des traitements suivants à un autre :**

*Choisissez le traitement de première intention dans la liste de la colonne DE et indiquez vos préférences de changement pour les patients présentant un échec au traitement biologique de première intention dans les colonnes À.*

*Le total de chaque ligne doit être de 100 %.*

| DE                     | À                     |                     |                      |                        | Chirurgie |
|------------------------|-----------------------|---------------------|----------------------|------------------------|-----------|
|                        | Remicade (influximab) | Humira (adalimumab) | Simponi (golimumab)* | Cimzia (certolizumab)* |           |
| Remicade (influximab)  | -                     |                     |                      |                        |           |
| Humira (adalimumab)    |                       | -                   |                      |                        |           |
| Simponi (golimumab)*   |                       |                     | -                    |                        |           |
| Cimzia (certolizumab)* |                       |                     |                      | -                      |           |

Rows must add to 100%.

Suppress any rows where 'do not use' selected at Q5c

**Q10a) Chez les patients atteints de rectocolite hémorragique ayant changé pour un traitement biologique de seconde intention après un échec du traitement biologique de première intention, combien connaissent un échec primaire au second traitement biologique ?**

|  |               |
|--|---------------|
|  | % de patients |
|--|---------------|

|                        |  |
|------------------------|--|
| Remicade (infliximab)  |  |
| Humira (adalimumab)    |  |
| Simponi (golimumab)    |  |
| Cimzia (certolizumab)* |  |

% must be 100% or less

Suppress any rows where 'do not use' selected at Q5a

**Q10b) Chez les patients atteints de rectocolite hémorragique ayant changé pour un traitement biologique de seconde intention après un échec du traitement biologique de première intention, combien connaissent un échec secondaire au second traitement biologique ?**

|                        | % de patients |
|------------------------|---------------|
| Remicade (infliximab)  |               |
| Humira (adalimumab)    |               |
| Simponi (golimumab)    |               |
| Cimzia (certolizumab)* |               |

% must be 100% or less

Suppress any rows where 'do not use' selected at Q5a

**Q10c) Échec secondaire : Chez les patients atteints de rectocolite hémorragique traités par un second traitement biologique pour lequel ils présentent une perte de réponse et arrêtent par conséquent le traitement pendant la phase d'entretien, par traitement utilisé, quelle proportion connaissent un échec dans les délais suivants ?**

*Indiquez un pourcentage.*

|                   | Second traitement biologique |                     |                     |                        |
|-------------------|------------------------------|---------------------|---------------------|------------------------|
|                   | Remicade (infliximab)        | Humira (adalimumab) | Simponi (golimumab) | Cimzia (certolizumab)* |
| 0 à ≤ 3 mois      |                              |                     |                     |                        |
| > 3 à ≤ 6 mois    |                              |                     |                     |                        |
| > 6 mois à ≤ 1 an |                              |                     |                     |                        |
| > 1 à ≤ 2 ans     |                              |                     |                     |                        |
| > 2 à ≤ 3 ans     |                              |                     |                     |                        |
| > 3 à ≤ 4 ans     |                              |                     |                     |                        |
| > 4 à ≤ 5 ans     |                              |                     |                     |                        |
| > 5 ans           |                              |                     |                     |                        |

Answer in each column must add to 100%

Suppress any columns where do not use' selected at Q5a

**Q10d) Chez les patients atteints de maladie de Crohn ayant changé pour un traitement biologique de seconde intention après un échec du traitement biologique de première intention, combien connaissent un échec primaire au second traitement biologique ?**

*Indiquez un pourcentage.*

|                       | % de patients |
|-----------------------|---------------|
| Remicade (infliximab) |               |



|                        |  |
|------------------------|--|
| Humira (adalimumab)    |  |
| Simponi (golimumab)*   |  |
| Cimzia (certolizumab)* |  |

Answer must be 100% or less on each line

Suppress any rows where 'do not use' selected at Q5c

**Q10e) Chez les patients atteints de maladie de Crohn ayant changé pour un traitement biologique de seconde intention après un échec du traitement biologique de première intention, combien connaissent un échec secondaire au second traitement biologique ?**

*Indiquez un pourcentage.*

|                        |               |
|------------------------|---------------|
|                        | % de patients |
| Remicade (infliximab)  |               |
| Humira (adalimumab)    |               |
| Simponi (golimumab)*   |               |
| Cimzia (certolizumab)* |               |

Answer must be 100% or less on each line

Suppress any rows where 'do not use' selected at Q5c

**Q10f) Échec secondaire : Chez les patients atteints de maladie de Crohn traités par un second traitement biologique pour lequel ils présentent une perte de réponse et arrêtent par conséquent le traitement pendant la phase d'entretien, par traitement utilisé, quelle proportion connaissent un échec dans les délais suivants ?**

*Indiquez un pourcentage.*

|                   | Second traitement biologique |                     |                      |                        |
|-------------------|------------------------------|---------------------|----------------------|------------------------|
|                   | Remicade (infliximab)        | Humira (adalimumab) | Simponi (golimumab)* | Cimzia (certolizumab)* |
| 0 à ≤ 3 mois      |                              |                     |                      |                        |
| > 3 à ≤ 6 mois    |                              |                     |                      |                        |
| > 6 mois à ≤ 1 an |                              |                     |                      |                        |
| > 1 à ≤ 2 ans     |                              |                     |                      |                        |
| > 2 à ≤ 3 ans     |                              |                     |                      |                        |
| > 3 à ≤ 4 ans     |                              |                     |                      |                        |
| > 4 à ≤ 5 ans     |                              |                     |                      |                        |
| > 5 ans           |                              |                     |                      |                        |

Answer in each column must add to 100%

Suppress any columns where 'do not use' selected at Q5c

\* Le certolizumab serait utilisé hors indication dans cette population

\* Le golimumab serait utilisé hors indication dans cette population
